1 **MicroRNA775 Promotes Intrinsic Leaf Size and Reduces Cell Wall Pectin Level via a**  
2 **Target Galactosyltransferase in *Arabidopsis***

3

4 He Zhang<sup>1</sup>, Zhonglong Guo<sup>1</sup>, Yan Zhuang<sup>2</sup>, Yuanzhen Suo<sup>3</sup>, Jianmei Du<sup>2</sup>, Zhaoxu Gao<sup>2</sup>, Jiawei  
5 Pan<sup>1</sup>, Li Li<sup>1</sup>, Tianxin Wang<sup>1</sup>, Liang Xiao<sup>4</sup>, Genji Qin<sup>1</sup>, Yuling Jiao<sup>5</sup>, Huaqing Cai<sup>6</sup>, Lei Li<sup>1,2,\*</sup>

6

7 <sup>1</sup>State Key Laboratory of Protein and Plant Gene Research, School of Life Sciences and School  
8 of Advanced Agricultural Sciences, Peking University, Beijing 100871, China

9 <sup>2</sup>Peking-Tsinghua Center for Life Sciences, Academy for Advanced Interdisciplinary Studies,  
10 Peking University, Beijing 100871, China

11 <sup>3</sup>Biomedical Pioneering Innovation Center, School of Life Sciences and Beijing Advanced  
12 Innovation Center for Genomics, Peking University, Beijing 100871, China

13 <sup>4</sup>College of Biological Sciences and Technology, Beijing Forestry University, Beijing 100083,  
14 China

15 <sup>5</sup>State Key Laboratory of Plant Genomics, Institute of Genetics and Developmental Biology,  
16 Chinese Academy of Sciences, and National Center for Plant Gene Research, 100101 Beijing,  
17 China

18 <sup>6</sup>National Laboratory of Biomacromolecules, CAS Center for Excellence in Biomacromolecules,  
19 Institute of Biophysics, Chinese Academy of Sciences, Beijing 100101, China

20

21 \*Correspondence should be addressed to lei.li@pku.edu.cn

22 **Abstract**

23 Plants possess unique primary cell walls made of complex polysaccharides that play critical roles  
24 in determining intrinsic cell and organ size. How genes responsible for synthesizing and  
25 modifying the polysaccharides are regulated by microRNAs (miRNAs) to control plant size  
26 remains largely unexplored. Here we identified 23 putative cell wall related miRNAs, termed  
27 CW-miRNAs, in *Arabidopsis thaliana* and characterized miR775 as an example. We showed  
28 that miR775 post-transcriptionally silences *GALT9*, which encodes an endomembrane-located  
29 galactosyltransferase belonging to the glycosyltransferase 31 family. Over-expression of miR775  
30 and deletion of *GALT9* significantly enlarged leaf-related organs, primarily owing to increases in  
31 cell size. Monosaccharide quantification, confocal Raman imaging, and immunolabelling  
32 combined with atomic force microscopy (AFM) revealed that the *MIR775A-GALT9* circuit  
33 modulates pectin level and elastic modulus of the cell wall. We further showed that *MIR775A* is  
34 directly repressed by the transcription factor ELONGATED HYPOCOTYL 5 (HY5). Genetic  
35 analysis confirmed that *HY5* is a negative regulator of leaf size and acts through the *HY5-*  
36 *MIR775A-GALT9* repression cascade to control pectin level. These results demonstrate that  
37 miR775-regulated cell wall remodeling is an integral determinant for intrinsic leaf size in *A.*  
38 *thaliana* and highlight the need to study other CW-miRNAs for more insights into cell wall  
39 biology.

40

## 41 **Introduction**

42 Precise control of organ size is a fundamental feature of living organisms that results in distinct,  
43 species-specific organ sizes and shapes (Bogre et al., 2008; Johnson and Lenhard, 2011; Hong et  
44 al., 2018). Genetic analyses in both animals and plants have established that intrinsic organ size  
45 is determined by the combinatory effects of cell proliferation and cell expansion (Bogre et al.,  
46 2008; Johnson and Lenhard, 2011; Gonzalez et al., 2012; Tumaneng et al., 2012; Hepworth and  
47 Lenhard, 2014; Hong et al., 2018). Over the past two decades, an increasingly detailed picture is  
48 emerging on cell proliferation control in plants, which involves transcriptional regulators  
49 (Mizukami and Fischer, 2000; Powell and Lenhard, 2012; Du et al., 2014), miRNAs (Rodriguez  
50 et al., 2010; Schommer et al., 2014; Yang et al., 2018), and the ubiquitin-proteasome pathway  
51 (Du et al., 2014). By comparison, our understanding of cell size control in plants is relatively  
52 sparse (Ferjani et al., 2007; Hong et al., 2018).

53 Different from metazoan cells, plant cells are enclosed in the cell walls, which locate  
54 between the middle lamella and the plasma membrane. To reach the desired size, plant cells rely  
55 on the balance between the inner turgor pressure and the extensibility of the cell walls (Cosgrove,  
56 2005; Palin and Geitmann, 2012; Hong et al., 2018). During growth and development, cell walls  
57 need to be loosened in a highly controlled way to allow nondestructive cell expansion, which  
58 might increase cell size by several orders of magnitude (Velasquez et al., 2011; Palin and  
59 Geitmann, 2012; Hong et al., 2018). Moreover, being sessile organisms, plants are extremely  
60 sensitive to the environment and exhibit a number of plastic responses, which allow them to  
61 reliably tune size and shape according to the prevailing environmental conditions (Hepworth and  
62 Lenhard, 2014; Hong et al., 2018). For example, in response to shading from neighbors, many  
63 plants undergo increased stem and petiole elongation in the well-characterized shade avoidance  
64 responses. Therefore, the plant cell wall is critical for determining both the intrinsic organ size  
65 and how it is shaped by the environment.

66 Primary plant cell wall is a highly complex and dynamic structure mainly composed of  
67 cellulose, hemicelluloses, and pectin (Somerville et al., 2004; Cosgrove, 2005; Somerville, 2006;  
68 Palin and Geitmann, 2012). These polysaccharide constituents have different structural and  
69 biological roles. Pectin is defined as a group of polysaccharides containing galacturonic acid that  
70 acts as gel-forming polymers to cross-link the hemicellulose and cellulose microfibrils  
71 (Somerville, 2006; Palin and Geitmann, 2012; Atmodjo et al., 2013). Studies using solid-state

72 nuclear magnetic resonance spectroscopy presented compelling evidence for extensive cellulose-  
73 pectin contacts but less cellulose-hemicellulose interactions in the cell walls than previously  
74 envisaged (Wang et al., 2015), suggesting that pectin plays an underappreciated role in cell wall  
75 remodeling.

76 Three major classes of pectin polymers have been identified in the cell wall matrix.  
77 These include homogalacturonan (HG), which possesses a backbone of 1,4-linked  $\alpha$ -D-  
78 galacturonosyluronic acid residues, rhamnogalacturonan I (RG-I), which consists of interspersed  
79  $\alpha$ -D-galacturonosyl and rhamnosyl residues with galactosyl and arabinosyl side-chains, and the  
80 lesser abundant rhamnogalacturonan II (RG-II) (Harholt et al., 2010; Palin and Geitmann, 2012;  
81 Atmodjo et al., 2013). Structural data indicate that these pectic constituents interconnect with each  
82 other in the wall via covalent linkages of their backbones (Atmodjo et al., 2013). Recently,  
83 nanoimaging studies have showed that HG in pavement cell walls may assemble into discrete  
84 nanofilaments rather than an interlinked network (Haas et al., 2020). It was suggested that local  
85 and polarized expansion of the HG nanofilaments could lead to cell enlargement without turgor-  
86 driven growth (Haas et al., 2020). However, biosynthesis and modifications of the pectin  
87 polysaccharides are highly complicated processes and their roles in cell wall remodeling remain  
88 to be fully elucidated. Given that the involved enzymes are likely integral membrane proteins in  
89 their active forms and the lack of robust *in vivo* assays, functional details of the pectin-related  
90 genes in regulating intrinsic organ size remain largely unknown (Qu et al., 2008; Harholt et al.,  
91 2010; Palin and Geitmann, 2012; Parsons et al., 2012; Atmodjo et al., 2013; Tan et al., 2013; Qin  
92 et al., 2017).

93 MiRNAs are an endogenous class of sequence-specific, *trans*-acting small regulatory  
94 RNAs that modulate gene expression mainly at the post-transcriptional level (Voinnet, 2009; Ma  
95 et al., 2010; Yang et al., 2012; Rogers and Chen, 2013). In plants, miRNAs are recognized to  
96 regulate an enormous collection of target genes that are implicated in numerous biological  
97 processes (Voinnet, 2009; Rogers and Chen, 2013; Rodriguez et al., 2016; Guo et al., 2020).  
98 Genetic analysis has uncovered that several miRNAs (e.g. miR319, miR396, and miR408)  
99 participate in regulating cell proliferation and organ growth (Palatnik et al., 2003; Ori et al.,  
100 2007; Rodriguez et al., 2010; Schommer et al., 2014; Zhang et al., 2014; Rodriguez et al., 2016;  
101 Pan et al., 2018; Yang et al., 2018). However, no systematic efforts have been reported to identify  
102 and functionally study miRNAs pertinent to the regulation of primary cell wall, even though

103 hundreds of genes are involved in wall biosynthesis and modifications. We reasoned that  
104 elucidation of the regulatory roles of cell wall related miRNAs, termed CW-miRNAs, should  
105 help expanding our understanding of how cell wall remodeling contributes to intrinsic organ size  
106 adjustment in plants.

107         In the current study, we identified a group of 23 putative CW-miRNAs in *A. thaliana*.  
108 We focused on functional characterization of miR775 as an exemplar CW-miRNA and  
109 delineated the *HY5-MIR775A-GALT9* repression pathway for modulating cell size and leaf size.  
110 Cellular analyses combining monosaccharide quantification, confocal Raman imaging,  
111 immunolabelling, and atomic force microscopy (AFM) revealed that this pathway regulates  
112 pectin level and elastic modulus of the cell wall. Collectively, these results demonstrated the  
113 importance of miRNA-based regulation of cell wall genes in controlling intrinsic organ size.

## 114 **Result**

### 115 **Identification and Analysis of Putative CW-miRNAs in *Arabidopsis***

116 To identify CW-miRNAs in *A. thaliana*, we collected 572 genes annotated as cell wall  
117 biosynthesis related and 491 genes encoding proteins enriched in the Golgi apparatus (Parsons et  
118 al., 2012). Searching against the 427 annotated miRNAs in *A. thaliana*, coupling computational  
119 prediction with degradome sequencing analysis, we identified 23 putative CW-miRNAs that are  
120 predicted to target 78 genes pertinent to primary wall biosynthesis (Figure 1; Supplemental Table  
121 1). Using 34 sequenced small RNA populations derived from six different organ types, we found  
122 that most of these miRNAs did not show strong organ specific expression pattern (Figure 1B).  
123 Together the CW-miRNAs account for 5.4% of all miRNAs annotated in *A. thaliana*. However,  
124 except miR156h that represses a gene encoding a pectin methylesterase inhibitor (Stief et al.,  
125 2014), miR773 that negatively regulates callose deposition in response to fungal infection  
126 (Salvador-Guirao et al., 2018), and miR827 that involves in phosphate homeostasis (Kant et al.,  
127 2011), functions of this cohort of miRNAs have not been investigated.

128         Sequence comparison in representative *A. thaliana* ecotypes and 13 *Brassicaceae*  
129 species revealed that most (17 or 73.9%) CW-miRNAs are only found in *A. thaliana* (Figure 1A).  
130 For example, miR775 was among the first batch of non-conserved miRNAs annotated in *A.*  
131 *thaliana* (Rajagopalan et al., 2006). We found that miR775 is highly conserved in *A. thaliana*  
132 ecotypes but absent in *A. lyrata* and *A. halleri* (Supplemental Figure 1). Consistent with previous  
133 reports (Felippes et al., 2008), we found that the closest pre-miR775a homolog in *A. lyrata*  
134 misses the mature miR775 sequence (Supplemental Figure 1A) and could not fold into the stem-  
135 loop secondary structure typical for miRNA precursors (Supplemental Figure 1B). These results  
136 suggest that miR775 has evolved specifically in *A. thaliana* after its divergence from the  
137 common ancestor of the *Arabidopsis* genus.

138         On the other hand, 75 of the 78 (96.2%) predicted target genes for the CW-miRNAs  
139 have apparent orthologs in the Brassicaceae. *GALT9*, the predicted target gene for miR775,  
140 encodes a galactosyltransferase belonging to the carbohydrate-active glycosyltransferase 31  
141 (Supplemental Figure 2). Sequence alignment revealed that the predicted miR775 binding site in  
142 *GALT9* contains five heterogeneous nucleotides across the examined *Brassicaceae* species  
143 (Figure 1C), more frequent than the surrounding sequences (Figure 1D). The five variable  
144 nucleotides have formed eight polymorphic combinations in the examined *Brassicaceae* species

145 (Figure 1E). Among these and possible paralogs in *A. thaliana*, the miR775 binding site in  
146 *GALT9* exhibited the highest MFE/MED ratio (Supplemental Figure 2B), which is the ratio  
147 between the minimum free energy (MFE) of a predicted miRNA:target duplex to the minimum  
148 duplex free energy (MED) of the miRNA bound to a fully complementary sequence, an  
149 quantitative indicator for likelihood of miRNA targeting (Alves et al., 2009). These results  
150 indicate that complementarity of *GALT9* to miR775 was selected in *A. thaliana*.

151

### 152 **Molecular Validation of *GALT9* as a MiR775 Target**

153 To validate *GALT9* as a miR775 target, we first performed the 5' RNA ligation mediated-rapid  
154 amplification of cDNA ends (5' RLM-RACE) assay (Llave et al., 2002). The detected 5' ends of  
155 truncated *GALT9* transcript locate preferentially at the 14<sup>th</sup> and 15<sup>th</sup> nucleotides within the region  
156 complementary to miR775, counting from the 5' end of miR775 (Figure 2). While this result  
157 supports miR775-guided *GALT9* cleavage, the detected transcript ends deviated by about four  
158 nucleotides from the conventional cleavage site between the 10<sup>th</sup> and 11<sup>th</sup> nucleotides of  
159 complementarity (Llave et al., 2002; German et al., 2009). We therefore performed degradome  
160 sequencing for further analysis. For comparison with the wild type, we generated miR775-  
161 overexpressing plants (*MIR775A-OX*) in which the enhanced Cauliflower Mosaic Virus 35S  
162 promoter was used to drive pre-miR775a expression (Supplemental Figure 3). From the  
163 degradome sequencing data, we retrieved reads mapped to the predicted miR775 binding site in  
164 *GALT9*, which were enriched in *MIR775A-OX* relative to the wild type (Figure 2B). Closer  
165 inspection revealed that the enriched reads were not confined to a single nucleotide but  
166 concentrated in a region several nucleotides downstream of the 10<sup>th</sup> position relative to the 5' end  
167 of miR775 (Figure 2C). These results are consistent with the 5' RLM-RACE data (Figure 2A) to  
168 support miR775-dependent cleavage of the *GALT9* transcript at unconventional sites.

169 Next, we tested whether miR775 is sufficient for repressing *GALT9* using the dual  
170 firefly luciferase (*LUC*) and *Renilla* luciferase (*REN*) reporter system (Liu et al., 2014). We  
171 generated a *GALT9-LUC* reporter construct in which the *GALT9* coding region was fused with  
172 that of *LUC* (Figure 2D). We also generated *GALT9<sup>m</sup>-LUC* by substituting the nucleotides of the  
173 miR775 binding site in *GALT9-LUC* but not the encoded amino acids (Figure 2A and 2D).  
174 Transient expression of these constructs in tobacco protoplasts showed that the *LUC/REN*  
175 chemiluminescence ratio was significantly lowered in the presence of miR775 (Figure 2D).

176 Attenuation of the LUC/REN ratio was abolished in the *GALT9<sup>m</sup>-LUC* plus miR775 combination  
177 (Figure 2D), indicating that miR775 represses *GALT9-LUC* expression in a site-specific manner.

178 Finally, we examined how endogenous *GALT9* level is affected by genetic manipulation  
179 of miR775. In addition to the *MIR775A-OX* lines, we employed the CRISPR/Cas9 system to  
180 delete a 123 bp genomic region in *MIR775A* (the only locus in *A. thaliana*) encompassing  
181 miR775 (Supplemental Figure 4). Homozygous lines with no detectable expression of miR775  
182 were selected and named *mir775* (Supplemental Figure 4B-4D). By quantitative reverse  
183 transcription coupled PCR (RT-qPCR) analysis, we found that the level of miR775 was  
184 significantly increased and decreased in *MIR775A-OX* and *mir775* in comparison to the wild  
185 type, respectively (Figure 2E). *GALT9* transcript level was significantly decreased in *MIR775A-*  
186 *OX* but increased in *mir775* relative to the wild type (Figure 2E). These results indicate that  
187 altering miR775 level is sufficient to reciprocally module *GALT9* transcript abundance.

188

### 189 **The *MIR775A-GALT9* Circuit Controls Organ and Cell Sizes**

190 To elucidate the biological role of miR775, we monitored morphology of the *mir775* plants  
191 throughout the life cycle. In comparison to the wild type, a size reduction of leaf-related organs,  
192 including the cotyledon, the fifth rosette leaf, and the petal, was observed for *mir775* (Figure 3;  
193 Supplemental Figure 4E-4H). Quantification confirmed that *mir775* has significantly smaller  
194 phyllome organs than the wild type (Figure 3D-3F). In contrast, mature organs of *MIR775A-OX*  
195 were significantly larger than those of the wild type (Figure 3). To confirm the *mir775* phenotype,  
196 we generated the *MIR775A-OX mir775* double mutant through genetic crossing (Supplemental  
197 Figure 5). We found that the *35S:pre-miR775a* transgene in the used *MIR775A-OX* line was able  
198 to restore miR775 transcript accumulation and rescue the organ reduction phenotype in the  
199 *mir775* background (Figure 3; Supplemental Figure 5).

200 To test the role of *GALT9* in phyllome organs, we employed the CRISPR/Cas9 system  
201 to delete the entire coding region of *GALT9* (Supplemental Figure 6). In the homozygous  
202 deletion lines (*galt9-1*), *GALT9* expression was drastically compromised in comparison with the  
203 wild type (Supplemental Figure 6A-6C). We also identified an *Arabidopsis* T-DNA line (*galt9-2*)  
204 carrying insertion in the start codon of *GALT9* (Supplemental Figure 6A). Both *galt9* mutants  
205 exhibited significantly enlarged phyllome organs than the wild type (Figure 3), phenotypes  
206 similar to *MIR775A-OX*. We also generated transgenic plants over-expressing *GALT9* (*GALT9-*



207 *OX*) and *GALT9<sup>m</sup>* (*GALT9<sup>m</sup>-OX*; see Figure 2A) driven by the 35S promoter (Supplemental  
208 Figure 7). Both *GALT9-OX* and *GALT9<sup>m</sup>-OX* plants displayed significantly reduced sizes of leaf-  
209 related organs than the wild type (Figure 3; Supplemental Figure 7), phenotypes similar to those  
210 of *mir775*.

211 In contrast to the phyllome, there are organs in *A. thaliana* that rely on heterotrophic  
212 growth to reach the intrinsic sizes, such as the hypocotyl, the silique, and the inflorescence stem  
213 (Geitmann and Ortega, 2009; Peaucelle et al., 2015; Andres-Robin et al., 2018). In comparison to  
214 the wild type, we found that hypocotyl length, silique length, and inflorescence height of the  
215 *mir775* plants were not statistically different from those of the wild type (Figure 4). By contrast,  
216 sizes of these organs of the *MIR775A-OX*, *galt9*, *GALT9-OX*, and *GALT9<sup>m</sup>-OX* plants were  
217 significantly altered compared to the wild type with the exception of hypocotyl length of *GALT9-*  
218 *OX* (Figure 4). Collectively, these results indicate that endogenous miR775 primarily promotes  
219 phyllome organ growth by repressing *GALT9* in *A. thaliana*.

220 In addition to *GALT9*, we have previously reported three other computationally  
221 predicted target genes for miR775 including *DICER-LIKE1* (*DCLI*) (Zhang et al., 2011).  
222 Inspection of the degradome sequencing data from both the wild type and *MIR775A-OX*  
223 backgrounds revealed no evidence for miR775-directed cleavage for these genes (Supplemental  
224 Figure 8). Furthermore, consistent with previous characterizations of the *dcli* mutants (e.g.  
225 Mallory and Vaucheret, 2006), an examined *dcli* T-DNA insertion mutant exhibited  
226 significantly reduced organ sizes in comparison to the wild type (Supplemental Figure 9),  
227 phenotype opposite to that of *galt9* or *MIR775A-OX*. Thus, *GALT9* is a *bona fide* miR775 target  
228 that plays an opposite role to miR775 in determining intrinsic organ size.

229 A change in organ size can be attributed to altered cell size and/or cell number. To  
230 assess the effects of the *MIR775A-GALT9* circuit, we selected four cell types from three organs  
231 for examination by cryo-scanning electron microscopy (cryo-SEM). Observed and quantified  
232 sizes of *MIR775A-OX* and *galt9* epidermal cells on the cotyledon, the petal, and the hypocotyl as  
233 well as the guard cells on the cotyledon were significantly larger than those of the wild type  
234 (Figure 5). Opposite phenotypes were observed for *mir775* and *GALT9-OX* cells (Figure 5A-5E).  
235 Moreover, a highly linear relationship with a virtually 1:1 slope between the cell size and the  
236 organ size was observed for the three examined organ types across the five genotypes (Figure  
237 5F). These results indicate that changes in cell size are primarily responsible for changes in organ

238 size caused by manipulating the *MIR775A-GALT9* circuit.

239

### 240 ***MIR775A-GALT9* Modulates Pectin Level and Cell Wall Elasticity**

241 Members of the *GALT* family have been extensively implicated in cell wall remodeling  
242 (Supplemental Figure 2A) (Bouton et al., 2002; Qu et al., 2008; Qin et al., 2017). As most  
243 proteins involved in cell wall remodeling locate on the endomembrane (Parsons et al., 2012), we  
244 determined the subcellular localization of *GALT9*. RESPONSIVE TO ANTAGONIST1 (*RAN1*)  
245 is a copper transporter reported to reside on the endomembrane (Hirayama et al., 1999). Using  
246 *GALT9* fused with the green fluorescent protein (GFP), we found that *GALT9*-GFP colocalized  
247 with mCherry-tagged *RAN1* transiently co-expressed in the same tobacco leaf epidermal cells  
248 (Figure 6). This observation indicates that transiently expressed *GALT9* is located on the  
249 endomembrane.

250 To infer the molecular function of *GALT9*, we carried out a co-expression analysis and  
251 identified 174 genes that are co-expressed with *GALT9* in *A. thaliana* (Supplemental Dataset 1).  
252 Gene Ontology (GO) analysis revealed that these genes were most significantly enriched with  
253 GO terms related to cell wall biology and pectin metabolism in particular (Figure 6B). Manual  
254 review revealed that 20 of these genes are linked to pectin metabolism and related processes,  
255 including eight genes of the pectin lyase-like superfamily, four genes of the *TRICHOME*  
256 *BIREFRINGENCE-LIKE* family, and eight other genes in pectin synthesis and modifications  
257 based on experimental evidence in the literature (Figure 6C). As examples, co-expression  
258 patterns between *GALT9* and *TRICHOME BIREFRINGENCE* (*TBR*), which was shown to  
259 regulate pectin composition in the trichome and stem (Bischoff et al., 2010), and between  
260 *GALT9* and *POWDERY MILDEW RESISTANT6* (*PMR6*), a member of the pectin lyase-like  
261 superfamily and whose mutation caused smaller rosette leaves with altered pectin composition  
262 (Vogel et al., 2002), are shown in Figure 6D.

263 To confirm the involvement of *GALT9* in pectin metabolism, we performed  
264 monosaccharide composition analysis of the cell walls. We found that the relative amount of  
265 glucose, the primary monosaccharide of cellulose, was not significantly different in the de-  
266 starched fifth rosette leaves from the *mir775*, *MIR775A-OX*, *galt9*, and *GALT9-OX* plants in  
267 comparison to the wild type (Figure 7). In contrast, the relative amount of galacturonic acid, the  
268 representative derivative of pectin polysaccharides, was significantly lower in the *MIR775A-OX*

269 and *galt9* plants but higher in the *mir775* and *GALT9-OX* plants than the wild type (Figure 7A).  
270 Moreover, an inverse linear relationship between the relative amount of galacturonic acid and the  
271 relative cell size was observed among the five genotypes (Figure 7B). This linear relationship  
272 was not found for the relative glucose level (Figure 7B). These results indicate that *MIR775A-*  
273 *GALT9* specifically influences pectin level in the leaf cell walls.

274 Raman imaging is a technique for obtaining high-resolution, chemically specific, and  
275 non-destructive information of plant cell walls (Gierlinger et al., 2012; Zeng et al., 2016). Using  
276 a home-built coherent Raman microscope, we mapped *in situ* pectin distribution in a mutant  
277 defective in *QUARTET2* (*QRT2*). Stronger than wild type signals encircling cotyledon epidermal  
278 cells were observed in *qrt2* (Supplemental Figure 10), consistent with previous reports that  
279 *QRT2* is required for pectin degradation (Rhee and Somerville, 1998). Similar to *qrt2*, we  
280 detected stronger than wild type pectin signals in both *mir775* and *GALT9-OX* plants  
281 (Supplemental Figure 10A). The *MIR775A-OX* and *galt9* plants, in contrast, exhibited the  
282 opposite phenotype with weaker pectin signals than the wild type (Figure 8). This effect was  
283 specific for pectin, as no difference in cellulose deposition among *MIR775A-OX*, *galt9*, and the  
284 wild type was observed (Figure 8A and 8C). Quantification of the signal intensity confirmed that  
285 pectin content was significantly reduced in *MIR775A-OX* and *galt9* (Figure 8D).

286 As HG accounts for more than 60% of plant cell wall pectin (Caffall and Mohnen,  
287 2009), we performed immunohistochemical analysis of cotyledons using a fluorescence-labeled  
288 monoclonal antibody (LM19) specific for HG (Verhertbruggen et al., 2009). Fluorescence  
289 microscopy revealed that LM19 signals in the *MIR775A-OX* and *galt9* seedlings were drastically  
290 reduced in comparison to the wild type (Figure 8E). By contrast, Fluorescent Brightener 28  
291 (FB28), which mainly stains cellulose, generated signals with no obvious difference among the  
292 genotypes (Figure 8E). These results confirmed that *miR775* and *GALT9* reduces and promotes  
293 pectin deposition in the cell walls, respectively.

294 AFM is useful for determining the surface structures and mechanical characters of  
295 biological samples at the nanometer scale (Yakubov et al., 2016). To investigate the link between  
296 pectin content and mechanical property of the cell wall, we employed AFM to directly measure  
297 the elastic properties of the epidermal cells. This analysis showed that the *qrt2* mutant has higher  
298 elastic modulus than the wild type (Supplemental Figure 10B), consistent with the notion that  
299 higher pectin level leads to increased stiffness of the wall. We then applied AFM to measure the

300 elastic properties of the *MIR775A-OX* and *galt9* cotyledon cells and petal cells (Figure 9). In  
301 accordance with the cryo-SEM results (Figure 5), the 3D contour mapped by AFM revealed that  
302 the *MIR775A-OX* and *galt9* cells are larger than the wild type (Figure 9A and 9D). The  
303 *MIR775A-OX* and *galt9* cell walls, however, have elastic moduli significantly lower than the  
304 wild type (Figure 9C and 9F), indicating that the enlarged cells have reduced wall rigidity. Taken  
305 together, our results demonstrate that *MIR775A-GALT9* modulates pectin abundance in the cell  
306 wall and affects resistance to micro-indentation.

307

### 308 ***MIR775A* Is Negatively Regulated by *HY5* in Aerial Organs**

309 A full-length cDNA *BX81802* matches the *MIR775A* locus, allowing the transcription start site  
310 and proximal promoter region (*pMIR775A*) to be determined (Figure 10). To find out how  
311 *MIR775A* is transcriptionally regulated, we examined available whole genome chromatin  
312 immunoprecipitation (ChIP) data and identified an ELONGATED HYPOCOTYL5 (*HY5*)  
313 binding peak in *pMIR775A* (Figure 10A) (Zhang et al., 2011). As a key transcription factor for  
314 photomorphogenesis, *HY5* is known to bind to G-box-like motifs (Oyama et al., 1997; Yadav et  
315 al., 2002; Song et al., 2008). Indeed, we located a typical G-box like motif in *pMIR775A* that  
316 coincides with the *HY5* binding peak (Figure 10A). Using ChIP-qPCR, significant enrichment of  
317 *HY5* occupancy at *pMIR775A* was confirmed (Figure 10B). These results reveal *HY5* as a  
318 plausible upstream regulator for the *MIR775A-GALT9* circuit.

319 To examine the effect of *HY5* on *pMIR775A* *in vivo*, we generated the *35S:GFP* and  
320 *35S:HY5-GFP* effector constructs. As reporters, we used *pMIR775A* to drive *LUC* and *pMIR408*,  
321 which was previously shown to be activated by *HY5* (Zhang et al., 2014), as a positive control.  
322 We tested four effector-reporter combinations through co-infiltration of tobacco leaf epidermal  
323 cells. Attesting to validity of the assay, co-expression of *HY5* with *pMIR408:LUC* robustly  
324 enhanced *LUC* activity (Figure 10C). However, in the presence of *HY5*, the *pMIR775A* activity  
325 was markedly decreased (Figure 10C), indicating that *HY5* negatively regulates *MIR775A*. To  
326 corroborate this regulatory relationship in *A. thaliana*, we fused the  $\beta$ -glucuronidase (*GUS*) gene  
327 with *pMIR775A* and expressed the reporter in either the wild type (*pMIR775A:GUS*) or the *hy5-*  
328 *215* (*pMIR775A:GUS/hy5-215*) genetic background (Figure 10D). In both seedlings and adult  
329 plants, we found that *GUS* activity in the shoot was higher in *hy5-215* than in the wild type  
330 (Figure 10D; Supplemental Figure 11), confirming *HY5*-mediated *MIR775A* repression.

331 Finally, we performed RT-qPCR analysis to monitor the influence of *HY5* on miR775  
332 and *GALT9* transcript accumulation. For this purpose, we also employed a *HY5-OX* line in which  
333 expression of the *HY5* coding region was driven by the *35S* promoter (Gao et al., 2020). This  
334 analysis revealed that miR775 abundance increased in the *hy5-215* shoots but decreased in *HY5-*  
335 *OX* with reference to the wild type (Figure 10E). Conversely, *GALT9* transcript level was  
336 significantly lower in *hy5-215* but higher in *HY5-OX* shoots compared to the wild type (Figure  
337 10E). Collectively these results indicate that *HY5* binds to the *MIR775A* promoter to repress  
338 miR775 accumulation and derepress *GALT9* in aerial organs, thereby forming the *HY5-*  
339 *MIR775A-GALT9* repression cascade.

340 Previously, we reported that *HY5* positively regulates *MIR775A* based on analysis of  
341 miR775 abundance in whole young seedlings (Zhang et al., 2011). To ascertain whether *HY5*  
342 positively or negatively regulates *MIR775A*, we compared GUS activities in different organs of  
343 *pMIR775A:GUS* and *pMIR775A:GUS/hy5-215* plants. This analysis revealed that, in contrast to  
344 the aerial organs, GUS activity in *pMIR775A:GUS/hy5-215* root was consistently lower than that  
345 in the wild type background at different developmental stages (Supplemental Figure 11B-11D).  
346 In separately sampled shoots and roots, miR775 level determined by RT-qPCR was higher and  
347 lower in *hy5-215* compared to the wild type, respectively (Supplemental Figure 11E). These  
348 results indicate that *HY5* differentially regulates *MIR775A* in the aerial and underground organs.

349

### 350 **The *HY5-MIR775A-GALT9* Pathway Regulates Leaf Size**

351 The above findings prompted us to examine the role of *HY5* in leaf size determination. We  
352 generated a null *hy5-ko* allele by deleting almost the entire coding region using the  
353 CRISPR/Cas9 system (Supplemental Figure 12). Similar to the well-characterized *hy5-215* allele,  
354 which carries a point mutation that abolishes proper splicing of the first intron (Oyama et al.,  
355 1997), the *hy5-ko* seedlings exhibited larger cotyledons and longer hypocotyls than the wild type  
356 (Supplemental Figure 12B-12D). In the adult stage, the *hy5* mutants have larger rosette leaves  
357 and longer petioles than the wild type (Supplemental 12E). On the contrary, *HY5-OX* plants  
358 exhibited the opposite phenotypes in both the seedling and adult stages (Supplemental Figure  
359 12C-12E). These results extended previous works documenting the organ enlargement  
360 phenotypes of the *hy5* mutants (Sibout et al., 2006; Brown and Jenkins, 2008; Burko et al., 2020).

361 Using cryo-SEM, we analyzed and quantitated size of epidermal cells from both the

362 cotyledons (Supplemental Figure 12F and 12G) and the fifth rosette leaves of adult plants  
363 (Figure 11). In both cases, we confirmed that the *hy5* mutants have significantly enlarged  
364 epidermal cells compared to the wild type. To test whether these effects were related to the  
365 pectin level, we performed Raman microscopy on the fifth rosette leaves and found that the *hy5*-  
366 *ko* cells have significantly less pectin than the wild type (Figure 11C and 11D). This finding was  
367 corroborated by quantifying the galacturonic acid content in the cell wall of the *hy5-ko* and wild  
368 type leaves (Figure 11E). AFM analysis showed that the *hy5-ko* cell walls have significantly  
369 reduced elastic modulus than the wild type (Figure 11F and 11G). These results indicate that  
370 *HY5* is a negative regulator for leaf size by increasing the pectin level and limiting cell expansion.

371 To genetically analyze whether *HY5* and *MIR775A-GALT9* act in the same pathway to  
372 regulate leaf growth, we generated the *hy5 mir775* and *hy5 GALT9-OX* double mutants through  
373 genetic crossing using *hy5-ko*. Quantification of the size of the fifth rosette leaves revealed that  
374 the leaf enlargement phenotype of *hy5-ko* was suppressed in both *hy5 mir775* and *hy5 GALT9*-  
375 *OX* (Figure 12). By cryo-SEM analysis and chemical quantification, we confirmed that the two  
376 double mutants mitigated the cell enlargement and pectin reduction phenotypes of *hy5-ko* (Figure  
377 12B). Moreover, a linear correlation between the cell size and leaf size was observed for the wild  
378 type, *hy5-ko*, *mir775*, *GALT9-OX*, *hy5 mir775* and *hy5 GALT9-OX* genotypes (Figure 12C).  
379 Conversely, a reverse correlation between cell size and pectin level was observed across the  
380 same genotypes (Figure 12D). Taken together, these results indicate that *MIR775A* and *GALT9*  
381 act downstream of *HY5* in the same genetic pathway to control pectin content and intrinsic leaf  
382 size (Figure 13).



384 **Discussion**

385 Organ size is one of the dominating traits for plant development and architecture. Molecular  
386 genetics studies in the past three decades have identified numerous genes in organ size control  
387 (Bogre et al., 2008; Johnson and Lenhard, 2011; Gonzalez et al., 2012; Hepworth and Lenhard,  
388 2014; Hong et al., 2018). Characterization of these genes has led to the conclusion that organ  
389 size control is primarily exerted by cell number regulation and cell size control is also integral to  
390 the intricate regulatory network governing organ size (Ferjani et al., 2007; Hong et al., 2018).  
391 Because the presence of a rigid plant cell wall, increasing of cell volume must be accompanied  
392 by mechanisms that allow timely wall relaxation. In this study, we identified 23 putative CW-  
393 miRNAs in *A. thaliana* that are potentially pertinent to the regulation of primary wall  
394 biosynthesis (Figure 1A). We selected miR775 as an example for functional characterization and  
395 provided new insights into how miRNAs may regulate organ size by modulating cell wall  
396 biosynthesis and/or modification.

397 We found that *GALT9* is the *bona fide* target for miR775 specifically in *A. thaliana*  
398 (Figures 1-3; Supplemental Figures 1 and 2). *GALT9* is a member of the glycosyltransferase 31  
399 family (Supplemental Figure 2A) and locates to the endomembrane (Figure 6A). It has been  
400 shown that several members of this family are capable of adding galactose to various glycans  
401 (Velasquez et al., 2011; Qin et al., 2017). The closest homolog to *GALT9* in cotton is *GhGALT1*  
402 (Supplemental Figure 2A). It was reported that *GhGALT1* overexpression in cotton resulted in  
403 smaller leaves, reduced boll size, and shorter fibers (Qin et al., 2017). *In vitro* purified  
404 GhGALT1 exhibited galactosyltransferase enzyme activity in galactan backbone biosynthesis  
405 (Qin et al., 2017). In this study, we provided a coherent body of evidence, including co-  
406 expression pattern with pectin related genes (Figure 6B-6D), monosaccharide quantification  
407 (Figure 7), confocal Raman microcopy and pectin immunolabelling (Figure 8; Supplemental  
408 Figure 10), that support an indisputable role of *GALT9* in modulating the level of cell wall  
409 pectin in *A. thaliana*.

410 Moreover, reduction in pectin content in *galt9* is associated with alteration to cell wall  
411 mechanical property. Using AFM, we analyzed both the cotyledon and petal epidermal cells and  
412 observed that the *galt9* and *MIR775A-OX* cell walls displayed significantly lower elastic  
413 modulus than that of the wild type (Figure 9; Supplemental Figure 10). This observation is  
414 consistent with previous AFM analysis of epidermal cells that linked variation in the pectin



415 network to changes in cell wall elasticity (Peaucelle et al., 2015; Xi et al., 2015). Together with  
416 studies on pectin biochemistry (Wolf et al., 2012; Xiao et al., 2014; Peaucelle et al., 2015;  
417 Andres-Robin et al., 2018), these findings suggest that attenuation of the pectin constitute in  
418 *galt9* and *MIR775A-OX* cell walls might compromise cross-link with cellulose, which in turn  
419 reduces elastic resistance to internal turgor pressure. This property of the cell wall would allow  
420 more expandability that translates into enlarged cell sizes, which we observed by cryo-SEM and  
421 AFM (Figures 5 and 9). Consistent with previous suggestions (e.g. Xiao et al., 2014), these  
422 results imply that the capacity for cell expansion is not maximized in the wild type organs due to  
423 rigidification of the pectin cross-linked cell walls. We hypothesize that by tuning pectin content,  
424 GALT9 might act as a downstream component of the regulatory networks that control cell  
425 expansion and present this idea in a conceptual model shown in Figure 13.

426         Regarding phyllome organs, we found that *MIR775A-OX* and *galt9* plants have  
427 significantly larger organs while *mir775* and *GALT9-OX* plants have smaller organs than the  
428 wild type (Figure 3; Supplemental Figures 3-7). Importantly, we did not observe substantial  
429 changes in the number of epidermal cells in any the examined organs (Figure 5). Across multiple  
430 organs of the *mir775*, *MIR775A-OX*, *galt9*, and *GALT9-OX* genotypes, a strong linear correlation  
431 between organ size and cell size was observed (Figure 5F). These changes in cell size resulted in  
432 essentially one-to-one changes in organ size across the examined genotypes (Figure 5F),  
433 suggesting that altered cell proliferation is not the cause for the observed changes in organ size.  
434 These findings thus indicate that the *MIR775A-GALT9* circuit is part of the cellular machinery  
435 that controls intrinsic organ size independent of cell proliferation (Ferjani et al., 2007; Hong et  
436 al., 2018).

437         Organogenesis requires coordinated cellular responses to developmental and  
438 environmental cues to realize the genetically determined growth potential. Through molecular  
439 and genetic analyses, we showed that in aerial organs *MIR775A* is under negative transcriptional  
440 control by *HY5* (Figure 10; Supplemental Figure 11). Extending previous studies (Sibout et al.,  
441 2006; Brown and Jenkins, 2008; Burko et al., 2020), we confirmed that *HY5* is a negative  
442 regulator for leaf size by modulating cell size (Figures 11 and 12; Supplemental Figure 12).  
443 Importantly, we found that the effect of *HY5* on cell size stems from alteration of pectin level and  
444 elasticity of the cell walls (Figures 11 and 12). *HY5-MIR775A-GALT9* is therefore a repression  
445 cascade operating in *A. thaliana* that imposes restriction on cell wall flexibility via GALT9-

446 mediated pectin deposition and helps the plant to reach the desired intrinsic leaf size (Figure 13).  
447 *HY5* is a key gene regulator for light signaling and photomorphogenesis (Oyama et al., 1997;  
448 Burko et al., 2020). Thus, whether the *HY5-MIR775A-GALT9* pathway is a mechanism for  
449 modulating pectin in the establishment of photomorphogenesis warrants investigation.

450 As *HY5* is a negative regulator of *MIR775A* (Figure 10), there should exist positive  
451 regulators for the spatiotemporal accumulation of miR775. Our preliminary results suggest that  
452 members of the class II *TCP* (*TEOSINTE BRANCHEDI*, *CYCLOIDEA*, *PCF*) transcription  
453 factor family, which regulate the transition from cell division to cell expansion in dicot leaves  
454 (Palatnik et al., 2003; Ori et al., 2007; Efroni et al., 2008; Schommer et al., 2014), are candidates  
455 that activate *MIR775A*. It would be interesting to characterize these organogenesis-related factors  
456 that regulate miR775 to further elucidate how this miRNA contributes to pectin dynamics during  
457 leaf development. These efforts should be instrumental to reveal how other CW-miRNAs relay  
458 developmental or environmental cues to regulate cell wall remodeling and prepare the cells  
459 transitioning into expansion-driven growth with proper resistance to turgor pressure to reach the  
460 intrinsic size.

461 As an important class of endogenous regulatory RNAs, miRNAs are known to regulate  
462 leaf organogenesis (Palatnik et al., 2003; Ori et al., 2007; Rodriguez et al., 2010; Schommer et  
463 al., 2014; Rodriguez et al., 2016; Yang et al., 2018). Several conserved miRNA families,  
464 including miR156, miR319, and miR396, have been shown to regulate diverse aspects of leaf  
465 organogenesis involving leaf initiation, phase transition, polarity establishment, and morphology  
466 (Braybrook and Kuhlemeier, 2010; Efroni et al., 2010; Yang et al., 2018). For instance, over  
467 activation of miR319 promotes cell proliferation and results in larger leaves made up of smaller  
468 cells in comparison to the wild type (Palatnik et al., 2003; Efroni et al., 2008). These phenotypes  
469 are in line with the “compensation phenomenon” whereby mutants defective in cell proliferation  
470 may alter cell size to reach relatively the same final organ size (Ferjani et al., 2007; Kawade et  
471 al., 2010; Czesnick and Lenhard, 2015). Our finding on the role of miR775 in regulating leaf size  
472 through cell wall remodeling adds one more node to the miRNA networks governing leaf  
473 development and morphogenesis in *A. thaliana*.

474 The miRNA families with known roles in leaf organogenesis, such as miR156, miR319,  
475 and miR396, are deeply conserved in angiosperm (Yang et al., 2018; Guo et al., 2020). In  
476 contrast, while the target gene *GALT9* is conserved in angiosperm (Figure 1D; Supplemental

477 Figure 2A), miR775 is an evolutionarily young miRNA unique to *A. thaliana* (Figure 1A;  
478 Supplemental Figure 1). Delineation of the *HY5-MIR775A-GALT9* pathway and documentation  
479 of the *mir775* phenotype (Figures 3-5, 10, and 12) demonstrated that *MIR775A* has been  
480 successfully integrated into the *A. thaliana* leaf developmental program. This finding suggests  
481 that the miRNA networks governing leaf development in different plant species may contain  
482 conserved “old” miRNAs interlaced with diverse species-specific “young” miRNAs. To confirm  
483 miRNA diversity in contributing to differential organ size control mechanisms, it would be  
484 interesting to test whether introducing species-specific CW-miRNAs such as miR775 or custom-  
485 designed artificial miRNAs into diverse plant species is sufficient to repress the *GALT9*  
486 orthologs and to modify organ size.

487 In summary, the evidence presented in this work highlights the function of a species-  
488 specific CW-miRNA in regulating cell and organ size in *A. thaliana*. Future investigation of  
489 other CW-miRNAs should provide additional insights into how plants orchestrate a complex  
490 sequence of molecular behaviors to modify the cell walls during development and in response to  
491 environmental cues. In addition to further elucidating the regulatory programs, these efforts  
492 would serve as a proof-of-concept to employ CW-miRNAs to sculpture plant size and  
493 architecture, which determine many agronomic traits in crops (Tang and Chu, 2017).

494



## 496 **Methods**

### 497 **Plant Materials and Growth Conditions**

498 The wild type plant used in this study was *A. thaliana* ecotype Col-0. To produce the  
499 *35S:MIR775A* and *35S:GALT9* constructs, the genomic regions containing pre-miR775a and the  
500 *GALT9* coding region were PCR amplified using the Pfusion DNA polymerase (New England  
501 Biolabs) and primers listed in Supplemental Table 2. The PCR products were cloned into the  
502 *35S-pKANNIBAL* vector (Li et al., 2010). The *35S:GALT9<sup>m</sup>* construct was generated by  
503 substituting the nucleotides of the miR775 binding site within the *GALT9* coding region but not  
504 the encoded amino acids using primers listed in Supplemental Table 2. Following transformation  
505 and selection with BASTA (20 mg L<sup>-1</sup>) (bioWORLD), transformants were allowed to propagate  
506 to the T<sub>2</sub> generation for analysis. The *HY5-OX* plants were as previously described (Gao et al.,  
507 2020). The *pMIR775A:GUS* line was generated by cloning the 1,064 bp genomic fragment  
508 upstream of the full-length cDNA BX81802 into the pCAMBIA-1381Xa vector (CAMBIA). The  
509 construct was used to transform wild type plants following the standard floral dipping method  
510 and selected with Hygromycin (20 mg L<sup>-1</sup>). T<sub>2</sub> generation plants were screened for GUS activity  
511 and a designated line was used for crossing into the *hy5-215* background.

512 A CRISPR/Cas9 system specific for plants was used to delete *MIR775A*, *GALT9*, and  
513 *HY5* as described (Mao et al., 2013). In the modified pCAMBIA1300 vector, the *35S* and the  
514 *AtU6-26* promoter respectively drive *Cas9* and pairs of sgRNA designed to target both ends of  
515 the target genes. The resulting constructs were introduced into wild type plants via  
516 transformation. T<sub>1</sub> generation plants were individually genotyped by PCR and sequencing to  
517 identify deletion events. Approximately 200 individual T<sub>2</sub> generation plants were further  
518 genotyped to identify Cas9-free homozygous mutant lines.

519 To grow *Arabidopsis* plants, surface sterilized seeds were plated on agar-solidified MS  
520 media including 1% (w/v) sucrose and incubated at 4°C for three days in the dark. Germinated  
521 seedlings were either allowed to grow on the plate for three weeks (16 h light/8 h dark at  
522 22°C/20°C) or transferred commercial soil and maintained in a growth chamber (16 h light/8 h  
523 dark at 22°C/20°C, 50% relative humidity). The light intensity was approximately 120 μmol m<sup>-2</sup>  
524 s<sup>-1</sup>. Tobacco seedlings used for transient assay were *Nicotiana benthamiana*, which were grown  
525 under settings of 16 h light/8 h dark, 25°C/21°C, 50% relative humidity, and light intensity of  
526 150-200 μmol m<sup>-2</sup> s<sup>-1</sup>.

527

## 528 **Identification of CW-miRNAs**

529 The 572 cell wall biosynthesis related genes were collected by GO term search. The 491 genes  
530 encoding Golgi-enriched proteins were obtained from previous studies (Parsons et al., 2012).  
531 Full-length cDNA sequences for a nonredundant combination of these genes were obtained from  
532 TAIR ([www.arabidopsis.org](http://www.arabidopsis.org)). Searching against the 427 annotated miRNAs in *A. thaliana*  
533 (miRBase, version 22) (Kozomara et al., 2018) was done using the computational tools  
534 psRNATarget (Dai and Zhao, 2011) and psRobot (Wu et al., 2012). This process produced two  
535 separate outputs, which were further searched against degradome sequencing data generated by  
536 the CleaveLand4 or StarScan pipeline (Addo-Quaye et al., 2009; Liu et al., 2015). Possible  
537 miRNA-target pairs predicted by both tools or by either one but compatible with degradome data  
538 were combined into a nonredundant dataset, which contained 23 miRNAs and 78 target genes  
539 listed in Supplemental Table 1. Conservation of CW-miRNAs was determined by searching  
540 against miRNAs in miRBase (version 22) and PmiREN (Guo et al., 2020). *Brassicaceae* species  
541 with genome sequences but no miRNA annotation were manually checked using BLASTN (E-  
542 value <  $1e^{-10}$ ) and RNAfold for evaluating the secondary structures as previously reported  
543 (Gruber et al., 2008). The predicted target genes were searched against seven Brassicaceae  
544 species with sequenced genomes for possible orthologs using BLASTP (E-value <  $1e^{-10}$ ).

545

## 546 **Degradome Sequencing and Analysis**

547 Total RNA from *MIR775A-OX* leaves was isolated using Trizol reagent (Invitrogen). Degradome  
548 library construction using biotinylated random primers was performed as previously described  
549 (German et al., 2008; 2009). The library was subjected to single-end sequencing (50 bp) on the  
550 Illumina Hiseq 2500 platform. A total of 63,558,618 clean reads were generated and 55,077,460  
551 mapped to the TAIR10 *A. thaliana* genome using Bowtie2 (Langmead and Salzberg, 2012),  
552 allowing no more than two mismatches. The sequencing data were deposited to the Sequence  
553 Read Archive database (SRR10322040). Three sets degradome sequencing data from the wild  
554 type seedlings (SRR3945024, SRR3945025, and SRR3945026) were used as control. Reads  
555 mapped to the predicted target sites were used to extrapolate the positions of the 5' transcript  
556 ends and to calculate the RPM values using an in-house Perl script.

557

## 558 **Quantitative RNA Analyses**

559 Total RNA was isolated using the Quick RNA Isolation kit (Huayueyang). Each sample was  
560 taken from the pooled tissues, such as leaves or roots. All experiments were repeated on at least  
561 three sets of independently prepared RNA. mRNA and miRNA were reverse transcribed into  
562 cDNA using the SuperScript III reverse transcriptase (Invitrogen) and the miRcute Plus miRNA  
563 First-Strand cDNA Synthesis kit (Tiangen), respectively. Quantitative PCR was performed with  
564 the ABI PRISM Fast 7500 Real-Time PCR engine using the TB Green Premix Ex TaqII (Tli  
565 RNaseH Plus) (TaKaRa) and the miRcute Plus miRNA qPCR kit (SYBR Green) (Tiangen) with  
566 three technical replicates, respectively. *Actin7* and 5S RNA were used as internal controls.  
567 Relative amounts of mRNA and miRNA were calculated using the comparative threshold cycle  
568 method.

569

## 570 **5' RLM-RACE**

571 The assay was performed using the 5'-Full RACE kit (TaKaRa) according to the manufacturer's  
572 instructions with modifications. Total RNA was isolated from seedlings and ligated to the 5'  
573 RNA adaptor by T4 RNA ligase (TaKaRa). Reverse transcription was performed with 9-nt  
574 random primers and the cDNA amplified by PCR with an adaptor primer and a gene-specific  
575 primer. This was followed by a nested PCR and cloning of the products using the Mighty TA-  
576 cloning kit (TaKaRa). Twenty independent clones were randomly picked and sequenced.

577

## 578 **REN/LUC Dual Luciferase Assays**

579 The *REN/LUC* construct was modified from the previous version (Liu et al., 2014) by using the  
580 *Actin2* promoter to drive the LUC fusion proteins. The *GALT9<sup>m</sup>-LUC* reporter construct was  
581 generated by substituting the nucleotides in the miR775 binding site within *GALT9* by PCR  
582 using primers listed in Supplemental Table 2. Three combinations of the two effectors and/or  
583 reporter constructs were used to transiently co-transform tobacco protoplasts as previously  
584 described (Liu et al., 2014). Chemiluminescence was detected using the NightSHADE LB 985  
585 system (Berthold) in the presence of 20 mg mL<sup>-1</sup> potassium luciferin (Gold Biotech). The  
586 LUC/REN ratio was calculated to infer effectiveness of miR775 targeting.

587

## 588 **Protein Localization**

589 The *GALT9* and *RAN1* coding sequences were respectively cloned into the pJIM19-  
590 GFP/mCherry/ vectors. *Agrobacterium* GV3101 cells harboring the 35S:*GALT9-GFP* and  
591 35S:*RAN1-mCherry* constructs were mixed and co-infiltrated into tobacco leaf epidermal cells  
592 with a syringe. The cells were observed three days thereafter using an LSM 710 laser scanning  
593 confocal microscope (Zeiss). Colocalization was analyzed using the Coloc 2 module in ImageJ.

594

### 595 **Co-expression Analysis**

596 The *GALT9* co-expressed genes in *A. thaliana* were obtained from the ATTED-II database  
597 (version 9) (Obayashi et al., 2018). The 174 co-expressed genes were identified based on the  
598 mutual rank index as a co-expression measure using a cutoff value of 400. The co-expressed  
599 genes were visualized using the built-in tools in ATTED-II.

600

### 601 **Cryo-SEM**

602 The method for cryo-SEM was as previously described (Esch et al., 2004) with minor  
603 modifications. The scanning electron microscope FEI Helios NanoLab G3 UC (Thermo  
604 Scientific) and the Quorum PP3010T workstation (Quorum Technologies), which has a cryo  
605 preparation chamber connected directly to the microscope, were used as a unit. Plant samples  
606 were frozen in subcooled liquid nitrogen (-210°C) and then transferred in vacuum cabin to the  
607 cold stage of the chamber for sublimation (-90°C, 5 min) and sputter coating (10 mA, 30 sec)  
608 with platinum. Images were taken using the electron beam at 2 kV and 0.2 nA with a working  
609 distance of 4 mm. Projective cell area of indicated samples was measured using ImageJ. Average  
610 cell size was determined by measuring 100 cells from at least three samples.

611

### 612 **Chemical Analysis of Cell Wall Components**

613 Cell wall cellulose level was determined using the Cellulose Extraction and Determination kit  
614 (Comin Biotechnology, [www.cominbio.com](http://www.cominbio.com)). Approximately 300 mg tissues per sample were  
615 homogenized in 1 mL 80% ethanol, heated at 90°C for 20 min, cooled to room temperature, and  
616 centrifuged at 6000g for 10 min. The insoluble pellets were washed once in 1 mL 80% ethanol  
617 and once in 1 mL acetone by vortexing and centrifugation at 6000g for 10 min. The pellets were  
618 resuspended in 1 mL solution I provided in the kit, de-starched for 15 h at room temperature, and  
619 collected by centrifugation at 6000g for 10 min, and dried. Five milligrams of the resulting cell



620 wall materials were homogenized in 0.5 mL distilled water, mixed with 0.75 mL concentrated  
621 sulfuric acid on ice, incubated for 30 min, and centrifuged at 8000g for 10 min at 4°C. Glucose  
622 determination in the supernatants was based on the anthrone assay (Yuan et al., 2019; Huang et  
623 al., 2020) using reagents provided in the kit and following the manufacturer's protocol. The  
624 glucose concentration from the blue-green samples was measured by absorbance at 630 nm using  
625 a NanoPhotometer P-class USB spectrophotometer (Implen GmbH).

626 Pectin level was determined using the Pectin Extraction and Determination kit (Comin  
627 Biotechnology). Briefly, approximately 50 mg tissues per sample were homogenized in 1 mL  
628 extraction buffer I provided in the kit, heated at 90°C for 30 min, cooled to room temperature,  
629 and centrifuged at 5000g for 10 min. The insoluble pellets were washed in 1 mL extraction  
630 buffer I by vortexing and centrifugation at 5000g for 10 min. The pellets were resuspended in 1  
631 mL extraction buffer II provided in the kit, heated at 90°C for 1 h, and centrifuged at 8000g for  
632 15 min. Galacturonic acid in the supernatants was determined by colorimetry as previously  
633 described (Taylor, 1993) using reagents provided in the kit. Absorbance of the pink- to red-  
634 colored samples at 530 nm was read on the NanoPhotometer P-class USB spectrophotometer.

635

### 636 **GUS Staining**

637 Care was taken to make sure whole plants or seedlings were submerged and evenly incubated at  
638 room temperature for 6 h in a GUS staining solution (1 mM 5-bromo-4-chloro-3-indolyl-b-D-  
639 glucuronic acid, 100 mM Na<sub>3</sub>PO<sub>4</sub> buffer, 3 mM each K<sub>3</sub>Fe(CN)<sub>6</sub>/K<sub>4</sub>Fe(CN)<sub>6</sub>, 10 mM EDTA,  
640 and 0.1% Nonidet P-40). After staining, chlorophyll was removed using 70% ethanol for 4 h,  
641 which was repeated three times.

642

### 643 **Confocal Raman Imaging**

644 Freshly detached *Arabidopsis* cotyledons and young leaves were washed sequentially with 70%,  
645 100%, and 70% ethanol for 10 min each to remove chlorophyll. After that, the samples were kept  
646 in water. Label-free imaging of cellulose and pectin was performed with a home-built coherent  
647 Raman microscope, fitted with a picoEmerald (Applied Physics & Electronics) picosecond laser  
648 as light source, which supplies tunable pump beam and fixed Stokes beam. As previously  
649 described (Gierlinger et al., 2012), 1100 cm<sup>-1</sup> (asymmetric stretching vibration of the glycoside  
650 bond C-O-C) and 854 cm<sup>-1</sup> (C-O-C skeletal mode of  $\alpha$ -anomers) were used for specific *in situ*

651 mapping of cellulose and pectin, respectively. The pump beams were respectively tuned to 952.5  
652 nm and 975.5 nm, synchronized, and visualized with an inverted microscope (Olympus)  
653 equipped with a 25× objective lens and a coherent Raman detection module. Each image was  
654 acquired with 512 by 512 pixels and averaged by 5 frames. A background image was acquired  
655 for each sample by only illuminating with the pump laser beam. For normalization, difference of  
656 the signal intensity between each image and the corresponding background image was divided  
657 by the background image using ImageJ.

658

### 659 **Pectin Immunolabelling**

660 This procedure was performed as previously described (Qi et al., 2017). Briefly, seven-day-old  
661 seedlings were fixed in absolute methanol under vacuum and embedded in Steedman's wax  
662 (Sigma-Aldrich). After rehydration, 8 μm sections were prepared and pre-treated for 1 h with 2%  
663 (w/v) BSA in PBS, and then incubated overnight with the primary antibody LM19 (PlantProbes)  
664 diluted 1:500 in 0.1% BSA. After three washes in BST buffer (0.1% BSA and 0.1% (v/v) Tween  
665 20), sections were incubated for 1 h with the secondary antibody Alexa Fluor 546 goat anti-rat  
666 IgG (Life Technologies) diluted 1:1,000 in 0.1% BSA. Sections were mounted in ProLong  
667 Antifade (Life Technologies) with cover slips and the Fluorescent Brightener 28 dye solution  
668 (Sigma-Aldrich) added. Fluorescence imaging was performed with an LSM 710 laser scanning  
669 confocal microscope (Zeiss).

670

### 671 **AFM Analysis**

672 Freshly detached cotyledons and petals were subject to AFM analysis as described with  
673 modifications (Peaucelle et al., 2015; Xi et al., 2015). Briefly, the samples were attached to glass  
674 slide using transparent nail polish and submerged under water at room temperature to prevent  
675 plasmolysis. The topographical images of epidermal cells were scanned with a BioScope  
676 Resolve atomic force microscope equipped with a ScanAsyst-Fluid cantilever (Bruker) of 20 nm  
677 tip radius and 0.7 N m<sup>-1</sup> spring constant. For topography, peak force error and DMT modulus  
678 images, Peak Force QNM mode of the acquisition software were used, with peak force frequency  
679 at 2 kHz and peak force set-point at 3 nN. The topology image size was 10 × 10 μm<sup>2</sup> or 20 × 20  
680 μm<sup>2</sup> with a resolution of 256 × 256 pixels recorded at a scan rate of 0.2 Hz. To map apparent  
681 Young's modulus, 1 to 2 mm-deep indentations were performed along the topological skeletons

682 of epidermal cells to ensure relative normal contact between the probe and sample surface. At  
683 least three indentation positions were chosen for each cell, with each position consecutively  
684 indented three times, making at least nine indentation force curves per cell. Data were analyzed  
685 with Nanoscope Analysis version 1.8.

686 **Supplemental Data**

687 Supplemental Figure 1. Comparison of Pre-miR775a Homologs in *A. thaliana* and *A. lyrata*.

688 Supplemental Figure 2. MiR775 Specifically Targets *GALT9* in *A. thaliana*.

689 Supplemental Figure 3. Characterization of *MIR775A-OX* Lines.

690 Supplemental Figure 4. Generation and Characterization of the *mir775* Mutant Lines.

691 Supplemental Figure 5. Characterization of the *MIR775A-OX mir775* Line.

692 Supplemental Figure 6. Generation and Characterization of the *galt9* Mutant Lines.

693 Supplemental Figure 7. Characterization of the *GALT9-OX* Lines.

694 Supplemental Figure 8. Degradome Sequencing Profiles of Predicted MiR775 Targets.

695 Supplemental Figure 9. Phenotypic Comparison of the *galt9* and *dcl1* Mutants.

696 Supplemental Figure 10. Analysis of the *qrt2* Mutant Defective in Pectin Turnover.

697 Supplemental Figure 11. *HY5* Differentially Regulates *MIR775A* in the Shoot and the Root.

698 Supplemental Figure 12. Generation and Characterization of Mutants for *HY5*.

699 Supplemental Table 1. Putative CW-miRNAs and Predicted Target Genes in *A. thaliana*.

700 Supplemental Table 2. Oligonucleotide Sequences of the Primers Used in This Study.

701 Supplemental Dataset 1. *GALT9* Co-expressed Genes in *A. thaliana*.

702 **Accession Number**

703 Sequence data from this article can be found in the *Arabidopsis* Genome Initiative or  
704 GenBank/EMBL databases under the following accession numbers: *MIR775A* (At1g78206), *HY5*  
705 (At5g11206), *GALT9* (At1g53290), *DCLI* (At1g01040), and *QRT2* (At3g07970). T-DNA  
706 insertion mutants used are *galt9* (SALK\_015338), *dcli* (SALK\_056243C), and *qurt2*  
707 (SALK\_031337).

708

709 **Author Contributions**

710 L.L. designed and supervised the research. H.Z., Y.Z., J.D., J.P., L.L, T.W., and H.C. performed  
711 the research. H.Z., Y.S., Z.G. (Guo), Z.G. (Gao), L.X., G.Q., and Y.J. analyzed the data. H.Z.  
712 and L.L. wrote the paper.

713

714 **Acknowledgements**

715 We thank Drs. Dong Liu and Chan Li at the National Center for Protein Science at Peking  
716 University for technical assistance in AFM operation and image analysis, Dr. Yiqun Liu and Ms.  
717 Yifeng Jiang at the Core Facilities of School of Life Sciences at Peking University for assistance  
718 with SEM. This work was supported by grants from the National Key Research and  
719 Development Program of China (2017YFA0503800) and the National Natural Science  
720 Foundation of China (31621001).

721

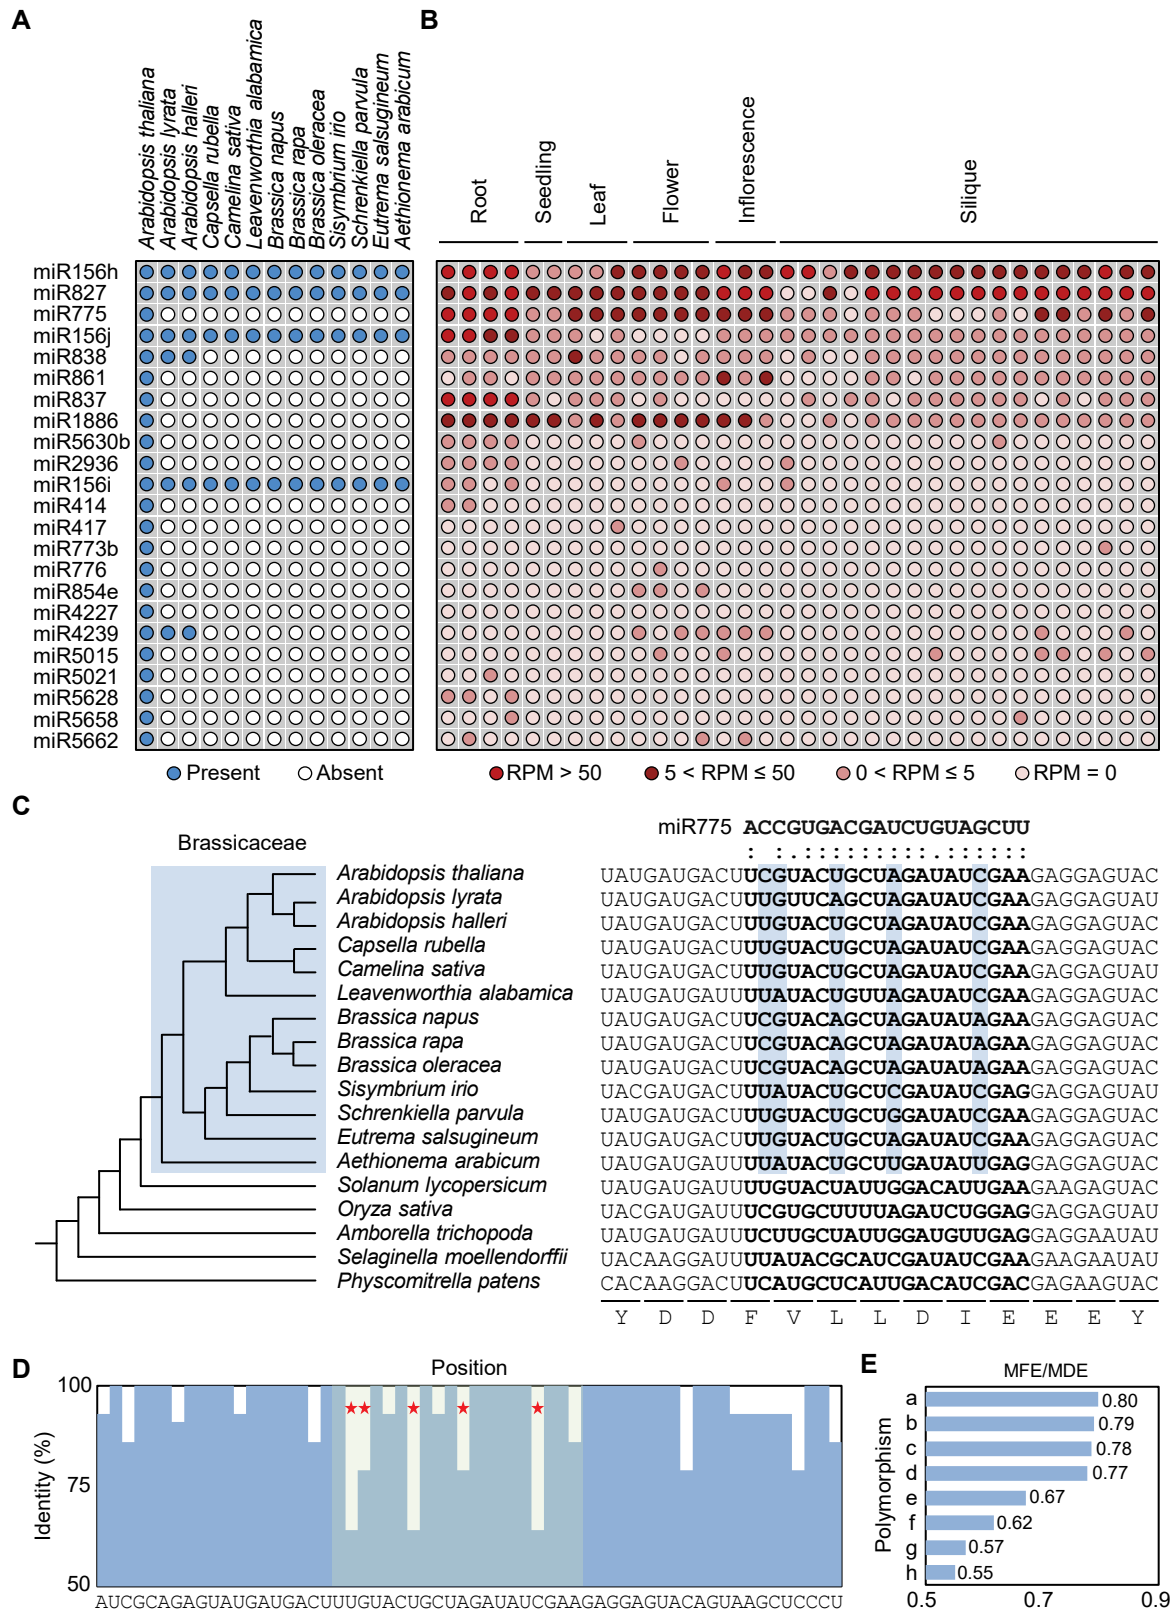

**Figure 1. Identification and Analysis of Putative CW-miRNAs in *A. thaliana*.**

**Figure 1. Identification and Analysis of Putative CW-miRNAs in *A. thaliana*.**

(A) Conservation of the 23 putative CW-miRNAs in *Brassicaceae*. Circles in blue indicate presence of a given CW-miRNA in the corresponding species. (B) Expression profile of the CW-miRNAs in *A. thaliana*. RPM (reads per million) values in 34 small RNA sequencing datasets, which are grouped into six organ types based on similarity of the sampled plant materials, are used to profile the miRNAs. (C) Comparison of the complementarity between miR775 and its possible binding site in *GALT9* homologs. On the left is a phylogenetic tree reconstructed with closest *GALT9* homologs from 18 species. Species in *Brassicaceae* are shaded in blue. On the right is an alignment of sequences flanking the miR775 binding site (in bold). The five polymorphic nucleotides within the miR775 binding site are shaded in green. (D) Quantification of nucleotide conservation in *GALT9* at the miR775 binding site across the 18 examined species. Red stars indicate the high-diversity nucleotides. The consensus sequence is shown below. (E) Calculated MFE/MED ratios for predicted miR775:target duplexes. Lower case letters represent observed combinations of the five polymorphic nucleotides. a, CGUAC; b, UGAAC; c, UGUAC; d, UGUGC; e, UAUAC; f, UAUCC; g, UAUUU; h, CGAAA.



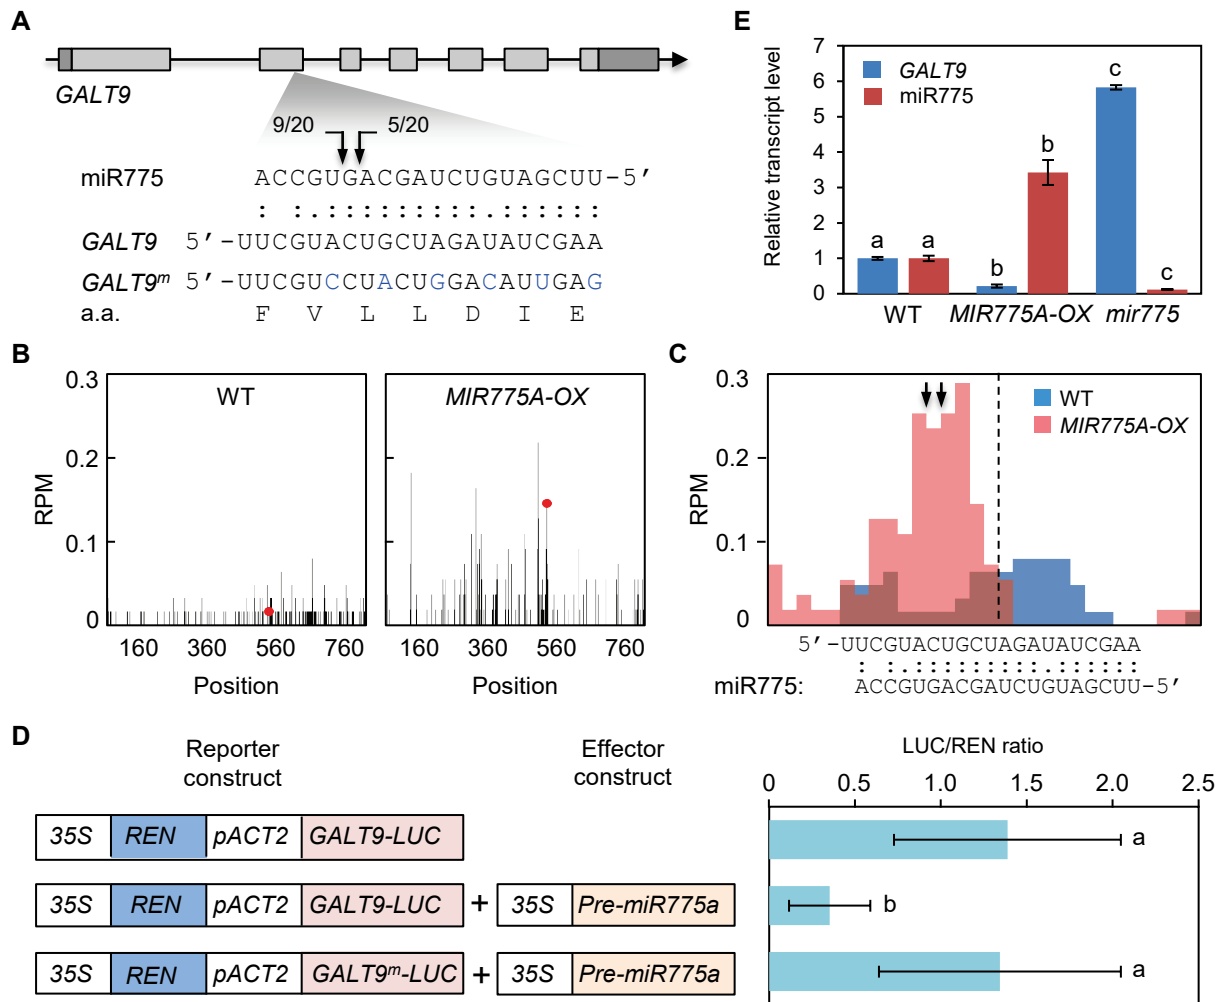

## Figure 2. Validation of *GALT9* as an Authentic MiR775 Target.

(A) 5' RLM-RACE analysis of *GALT9*. Gene structure of *GALT9* is shown on top. Base pairing between miR775 and *GALT9* is shown on bottom. Arrows mark detected cleavage sites along with frequency of the corresponding clones. Substituted nucleotides for making *GALT9<sup>m</sup>* are colored in blue. (B) Comparison of degradome sequencing data obtained from the wild type (left) and *MIR775A-OX* (right) plants. Frequency of the sequenced 5' ends is plotted against the position in the *GALT9* transcript. Red dots indicate position of reads with the highest frequency mapped to the miR775 binding site. (C) Sliding window analysis of degradome sequencing data at the miR775 binding site. Step of 4 nucleotides was used. Dashed line marks the position between the 10<sup>th</sup> and 11<sup>th</sup> nucleotides from the 5' end of miR775. Arrows indicate positions of the cleavage sites mapped by 5' RLM-RACE in A. (D) REN/LUC dual luciferase assay validating *GALT9* repression by miR775. The *Actin2* promoter was used to drive expression of *GALT9-LUC* or *GALT9<sup>m</sup>-LUC*. The 35S:*pre-miR775a* effector and the reporters were used to transiently co-transform tobacco protoplasts. The LUC/REN ratio of chemiluminescence is shown on the right. Data are means  $\pm$  SD from four independent transformation events. Different letters denote combinations with significant difference (Student's *t*-test,  $p < 0.05$ ). (E) Quantitative analysis of the miR775 and *GALT9* transcript levels in seedlings of the three indicated genotypes. Data are means  $\pm$  SD from three technical replicates. Different letters denote groups with significant difference (Student's *t*-test,  $p < 0.01$ ).

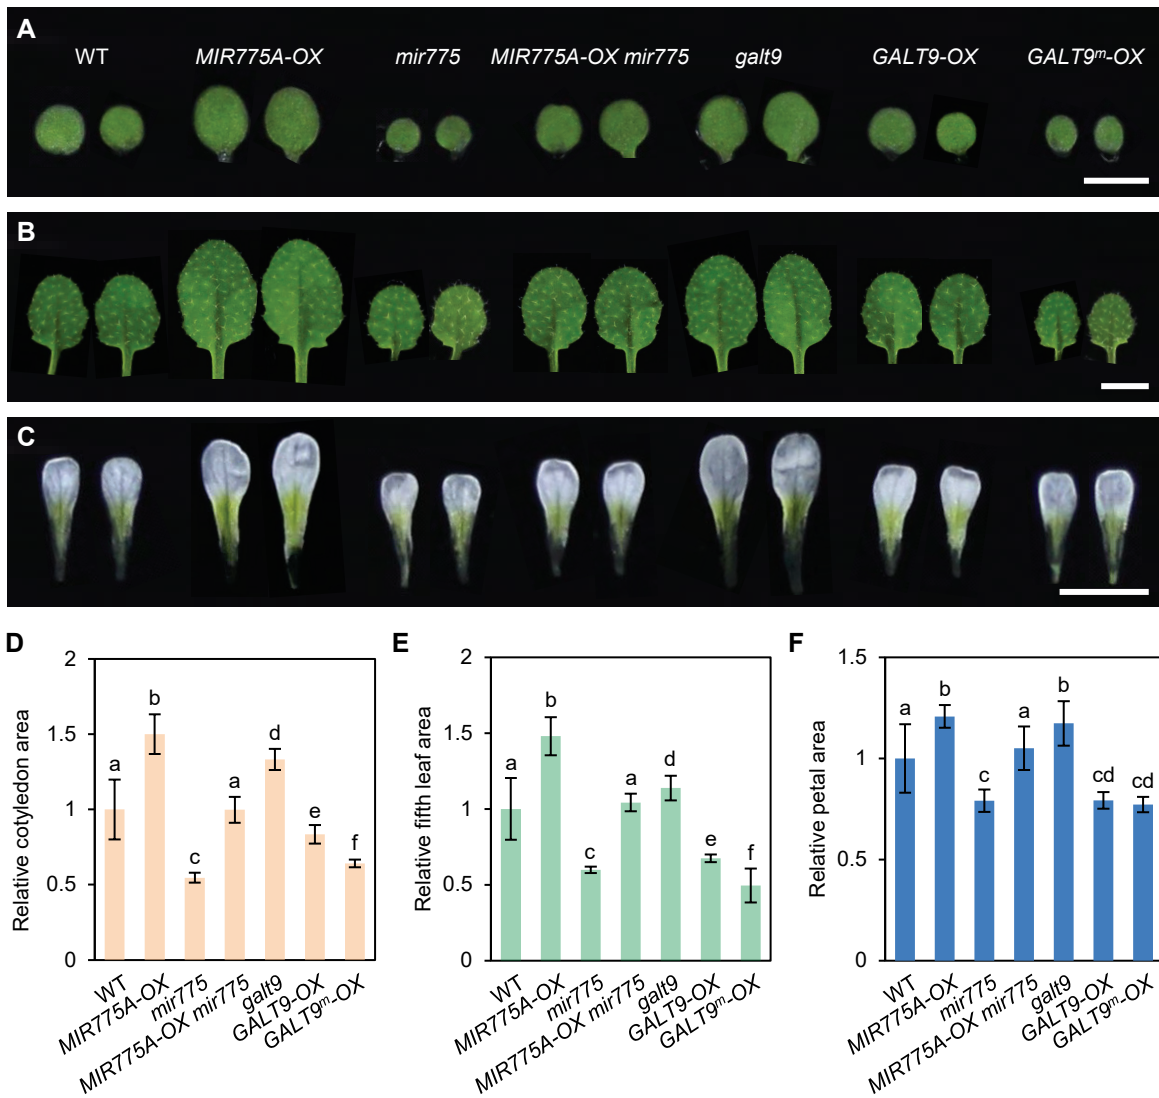

**Figure 3. *MIR775A* and *GALT9* Oppositely Regulate Size of Leaf-related Organs.**

(A-C) Morphological comparison of three representative organ types across the indicated genotypes. (A) Cotyledon of seven-day-old seedlings; (B) The fifth rosette leaf of three-week-old plants; (C) petal of open flowers. Bars, 2 mm. (D-F) Quantitative size measurement of cotyledons (D), the fifth rosette leaves (E), and the petals (F). Data are mean  $\pm$  SD from individual organs normalized against the wild type. Different letters denote genotypes with significant difference (Student's *t*-test,  $n = 30$ ,  $p < 0.001$  for D,  $n = 20$ ,  $p < 0.01$  for E,  $n = 30$ ,  $p < 0.001$  for F).

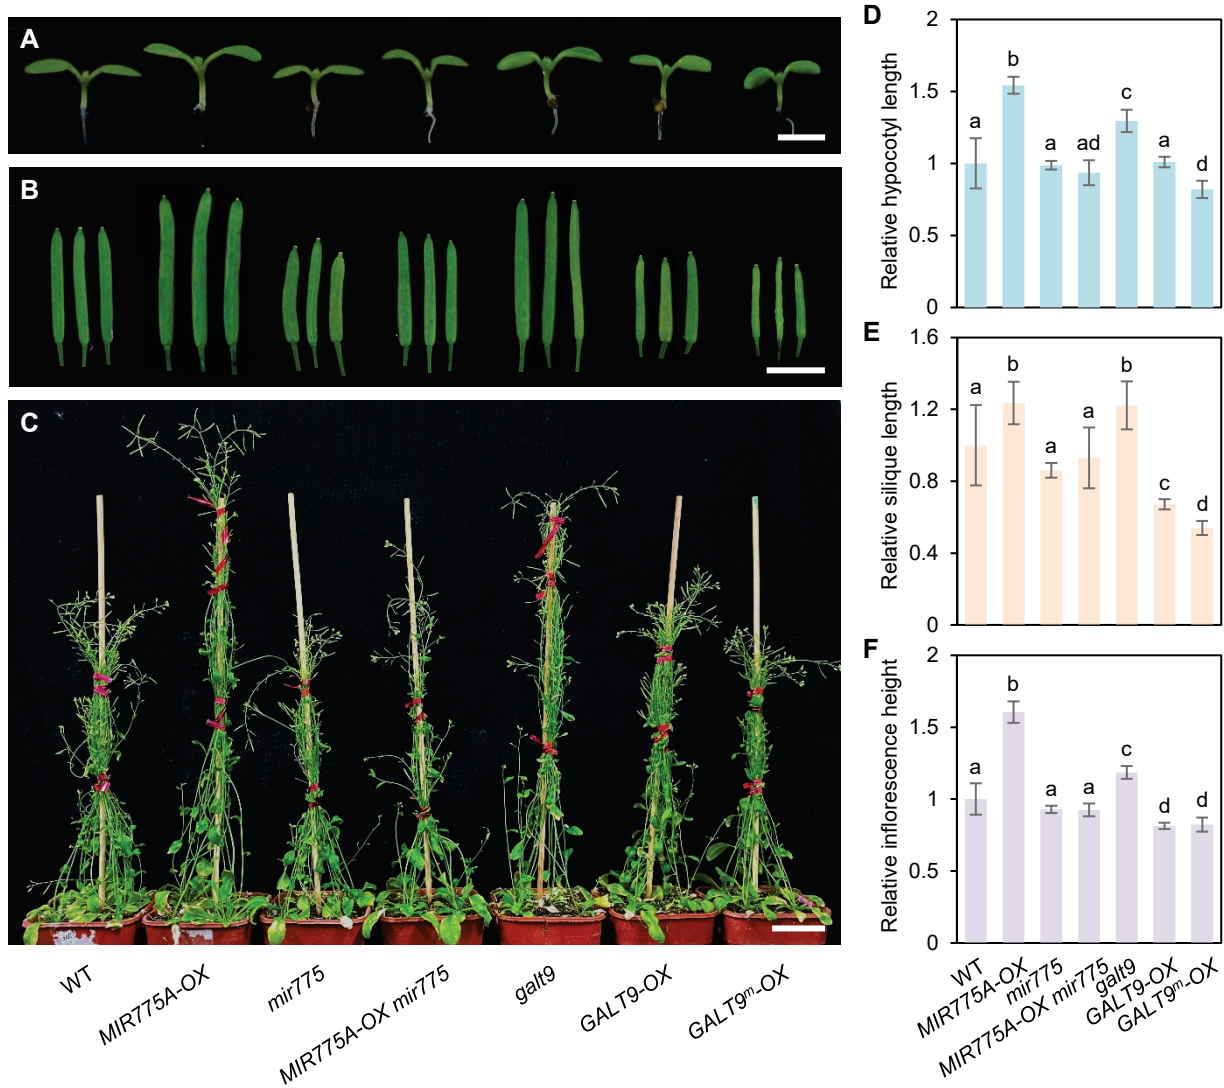

**Figure 4. *MIR775A* and *GALT9* Play Different Roles in Regulating Size of Heterotrophic Organs.**

(A-C) Morphological comparison of three representative organs with heterotrophic growth across the indicated genotypes. (A) Hypocotyl of seven-day-old seedlings, bar, 2 mm; (B) Mature silique, bar, 2 mm; (C) Mature inflorescence, bar, 2 cm. (D-F) Quantitative measurement of hypocotyl length (D), silique length (E), and inflorescence height (F). Values are mean  $\pm$  SD from individual organs normalized to the wild type. Different letters denote genotypes with significant difference (Student's *t*-test,  $n = 15$ ,  $p < 0.01$  for D,  $n = 30$ ,  $p < 0.001$  for E,  $n = 26$ ,  $p < 0.001$  for F).

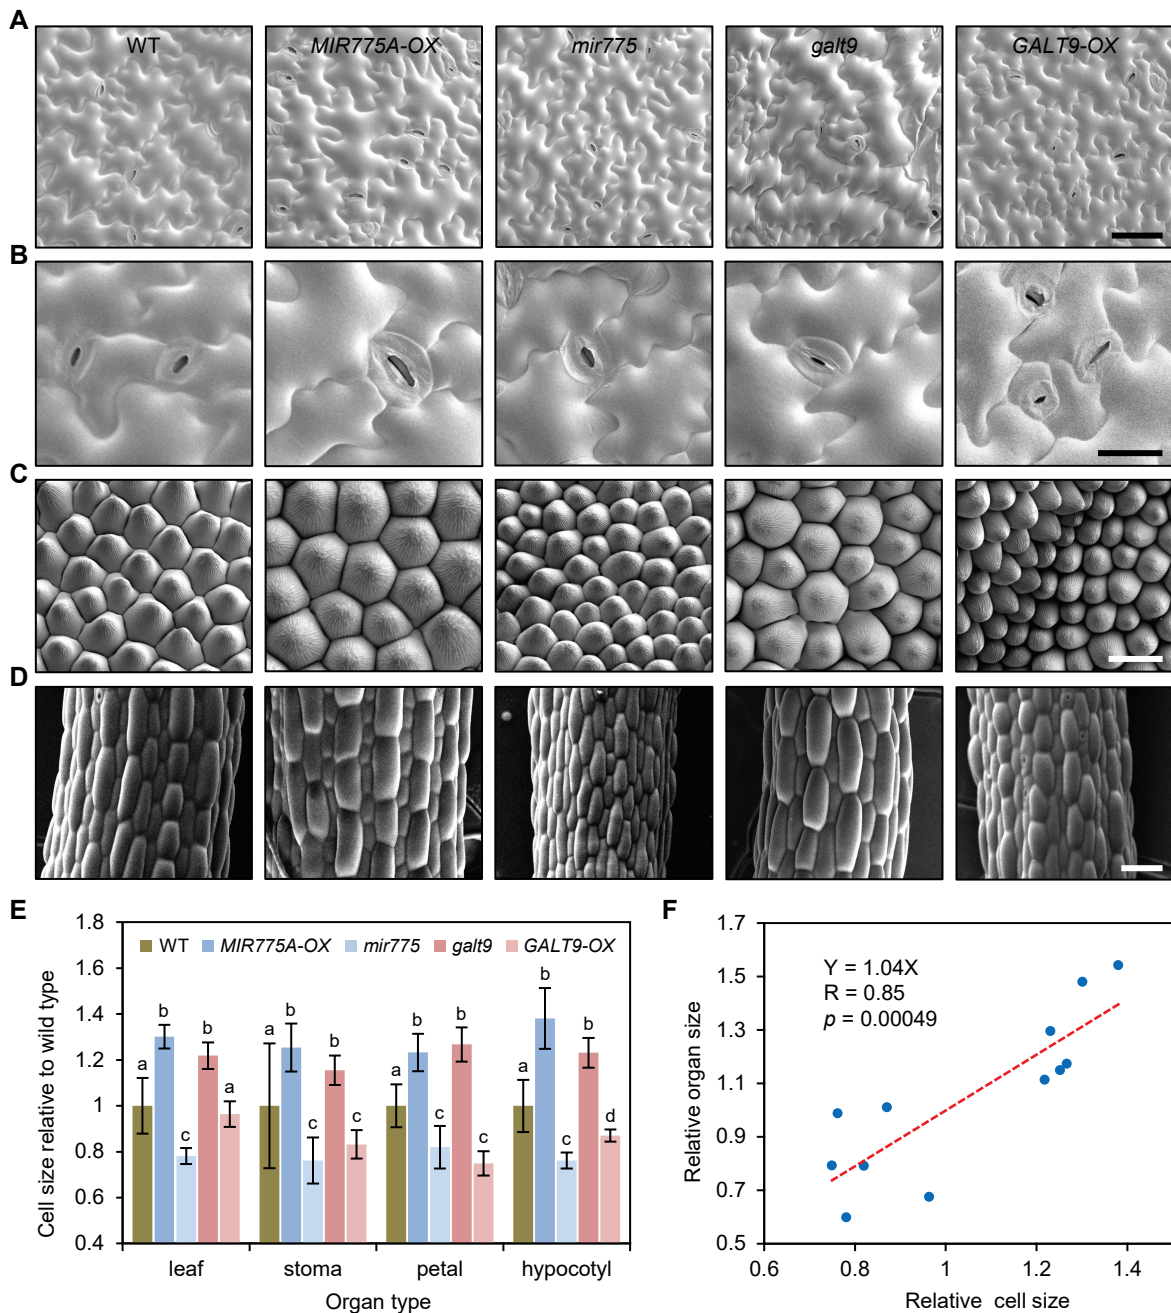

**Figure 5. The *MIR775A-GALT9* Circuit Controls Cell Size.**

(A-D) cryo-SEM analysis of epidermal cells of the five indicated genotypes. Shown are representative images for cotyledon (A), bar, 50  $\mu$ m; stoma including guard cells (B), bar, 20  $\mu$ m; petal (C), bar, 20  $\mu$ m; and hypocotyl (D), bar, 50  $\mu$ m. (E) Quantification of epidermal cell size from cotyledon, petal, and hypocotyl and stoma area. Data are mean  $\pm$  SD relative to the wild type from 30 individual cells of several individual plants. Different letters denote genotypes with significant difference (Student's *t*-test,  $p < 0.01$  for A, C and D,  $p < 0.05$  for B). (F) Correlation between cell size and organ size. Relative organ and cell sizes of three organs (cotyledon, petal, and hypocotyl) across the wild type, *MIR775A-OX*, *mir775*, *galt9*, and *GALT9-OX* genotypes were used for a linear regression analysis.

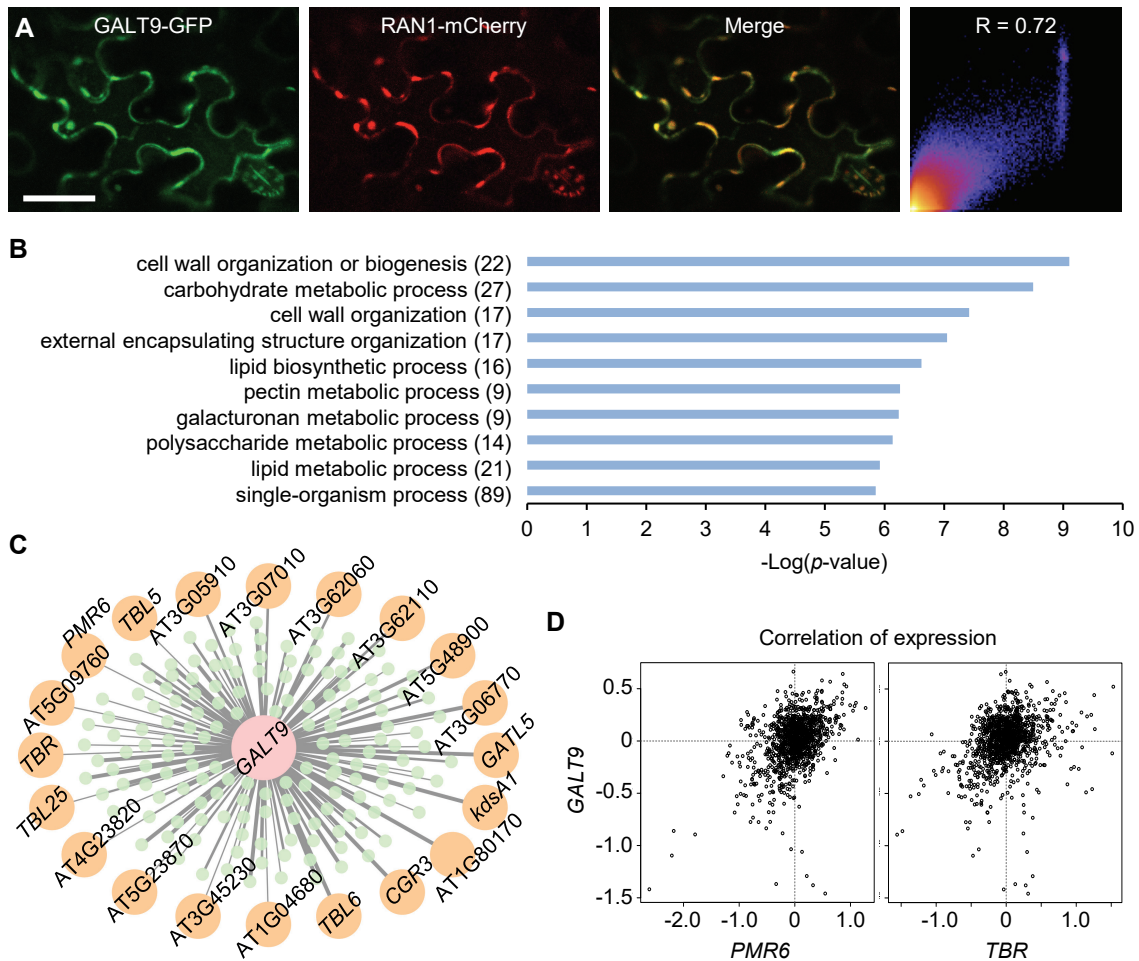

### Figure 6. *GALT9* Has a Deduced Role in Pectin Metabolism.

(A) Colocalization of *GALT9*-GFP with *RAN1*-mCherry in tobacco leaf epidermal cells. Scatter plot on the right shows correlation of GFP and mCherry fluorescence intensity. R, Pearson correlation coefficient. Bar, 50  $\mu$ m. (B) Top ten most significantly enriched GO terms in the biological process category associated with the 174 *GALT9* co-expressed genes. Numbers in parentheses are co-expression genes associated with each term. (C) Concentric display of *GALT9* co-expression genes with the 20 pectin-related genes shown on the periphery. Narrow lines representing mutual rank value above 200, medium lines representing 50-200, and wide lines representing 0-50. (D) Correlation pattern between *GALT9* and the pectin-related genes *PMR6* and *TBR*. Axes are  $\text{Log}_2$ -transformed expression levels against the averaged level of each gene.

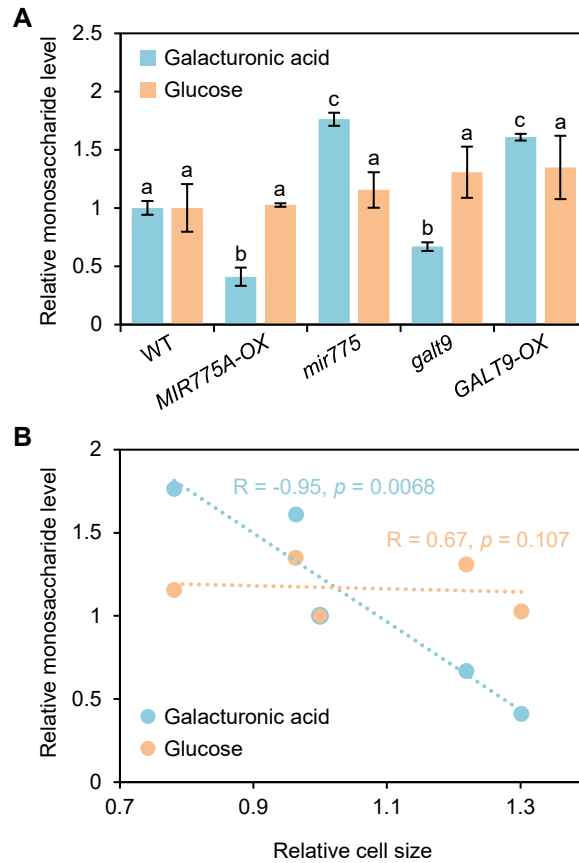

**Figure 7. The *MIR775A-GALT9* Circuit Regulates Cell Wall Pectin Level.**

**(A)** Quantification of the relative glucose and galacturonic acid levels in the cell walls. Hydroxylated cell wall materials extracted from the de-starched fifth rosette leaf of the indicated genotypes were used for monosaccharide measurement by colorimetry. Data are mean  $\pm$  SD from three technical replicates performed on pooled leaves. Within a set of measurements, different letters denote genotypes with significant difference (Student's *t*-test,  $p < 0.01$ ). **(B)** Correlation between relative cell size and the two quantified cell wall monosaccharides across the five genotypes by a linear regression analysis.

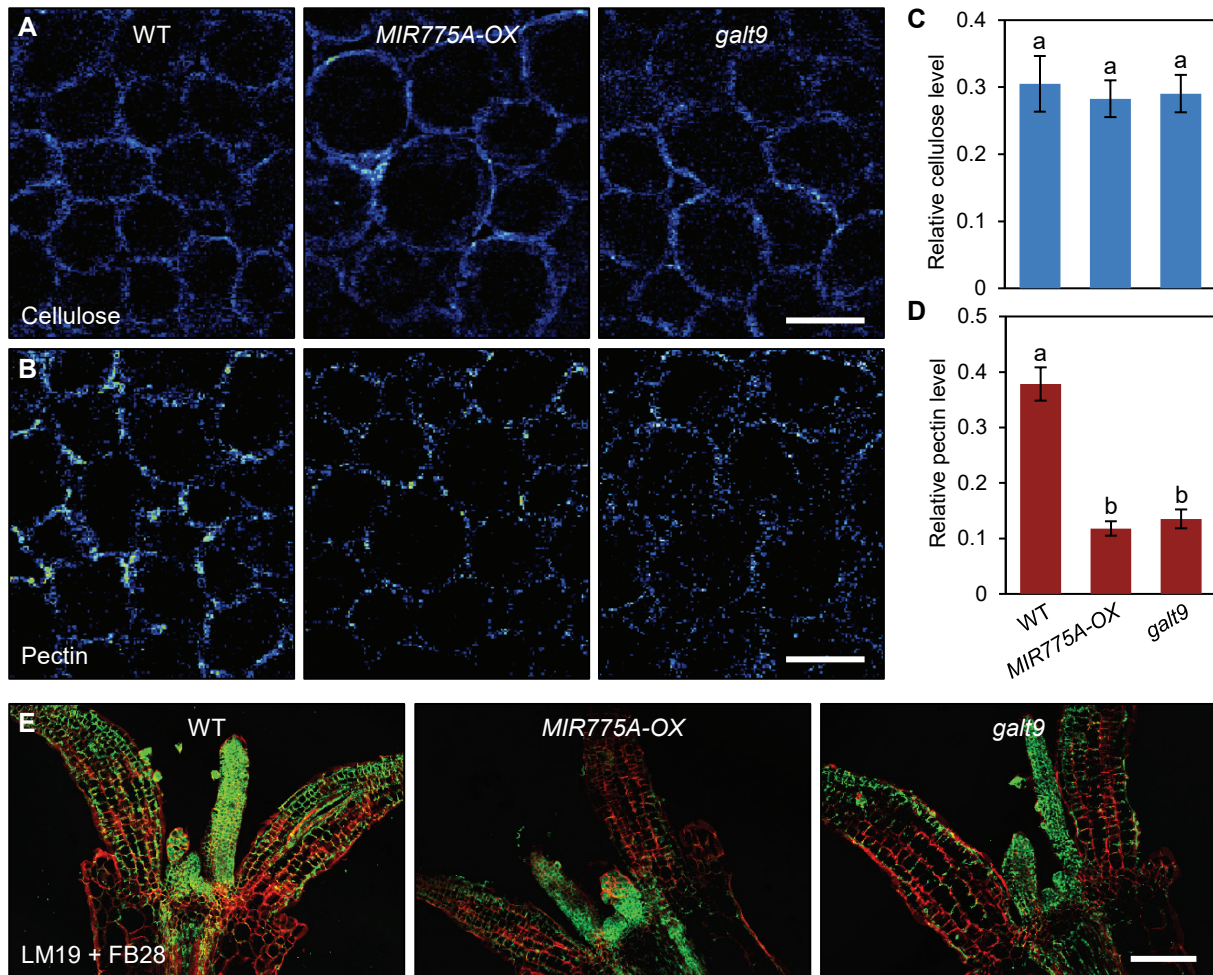

**Figure 8. *MIR775A-OX* and *galt9* Seedlings Have Reduced Cell Wall Pectin.**

(A-B) Examination of cell wall constituents by confocal Raman microscopy. Cotyledon mesophyll cells of seven-day-old wild type, *MIR775A-OX*, and *galt9* seedlings were imaged for cellulose (A) at 1100 cm<sup>-1</sup> and pectin (B) at 854 cm<sup>-1</sup>. Bars, 50 μm. (C-D) Relative cellulose and pectin levels deduced from Raman images. Average intensity in a 25 μm by 25 μm area at the cell corner was used to represent the level of the wall components. Data are mean ± SD of 15 areas from five cotyledons. Different letters denote genotypes with significant difference (Student's *t*-test, *p* < 0.01). (E) Immunohistochemical localization of pectin. The LM19 antibody (green) and the FB28 dye (red) were used to stain seven-day-old seedlings and examined by fluorescence microscopy. Bar, 100 μm.

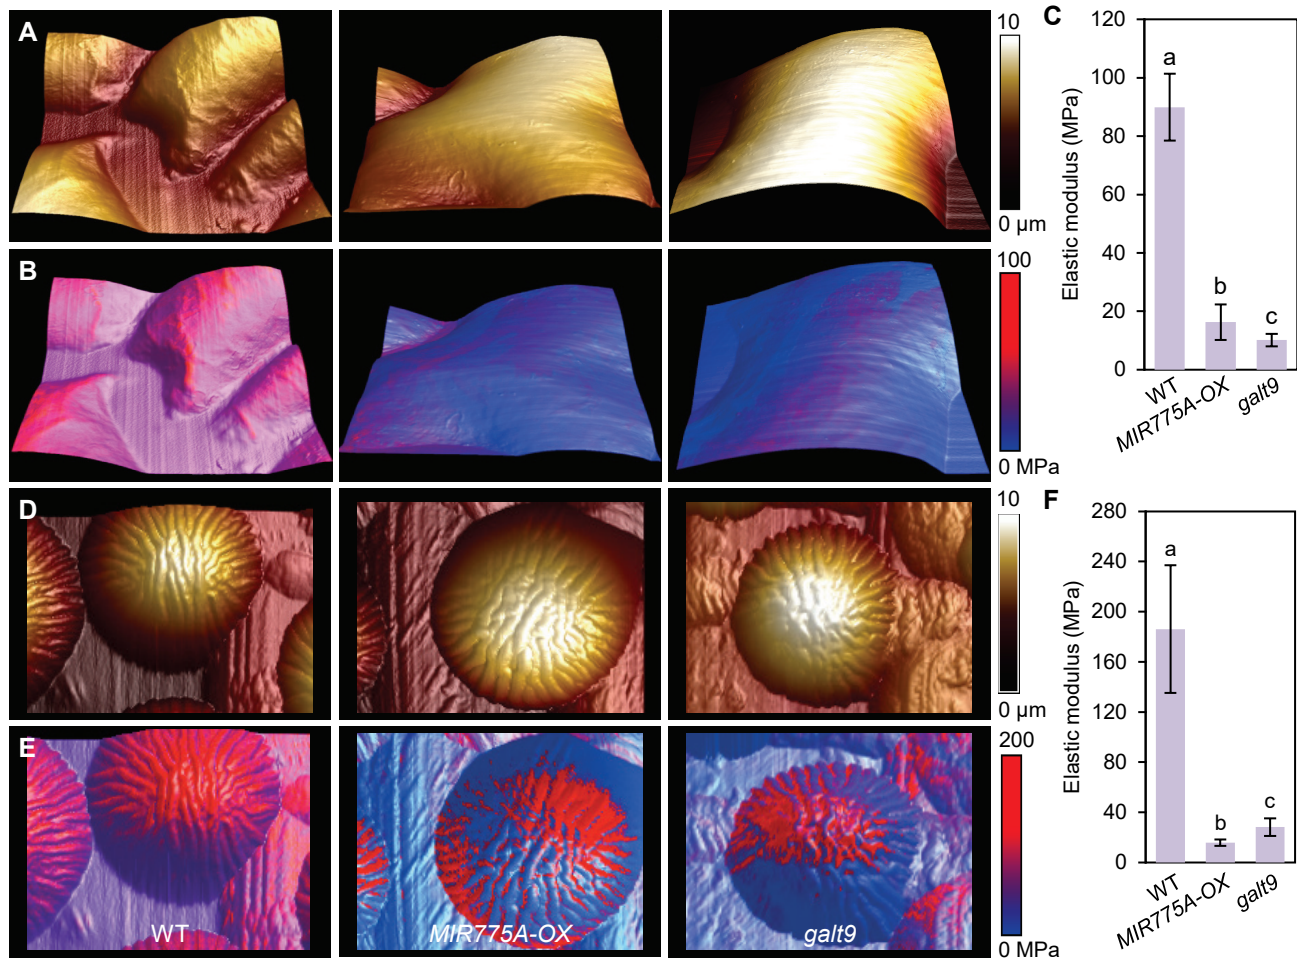

**Figure 9. *MIR775A-OX* and *galt9* Epidermal Cells Have Reduced Elastic Modulus.**

(A) AFM mapping of three-dimensional topography of epidermal cells. Individual cells of seven-day-old cotyledons were analyzed. Colors represent distance from the base, which is the deepest point the probe reaches. (B) Cell topography overlaid with elastic modulus. Colors indicate elasticity. (C) Quantification of apparent Young's modulus using the Peak Force QNM mode. Each measurement was the average in a 5  $\mu\text{m}$  by 5  $\mu\text{m}$  area of a cell with the highest modulus. Data are mean  $\pm$  SD of 10 cells from three cotyledons. Different letters denote genotypes with significant difference (Student's *t*-test,  $p < 0.001$ ). (D-F) Cell topography (D), topography overlaid with elasticity (E), and apparent Young's modulus (F) of the petal epidermal cells. Individual cells of petals of open flowers were analyzed. Each measurement was the average in a 10  $\mu\text{m}$  by 10  $\mu\text{m}$  area with the highest modulus. Data are mean  $\pm$  SD of 10 cells from three petals. Different letters denote significant difference (Student's *t*-test,  $p < 0.001$ ).



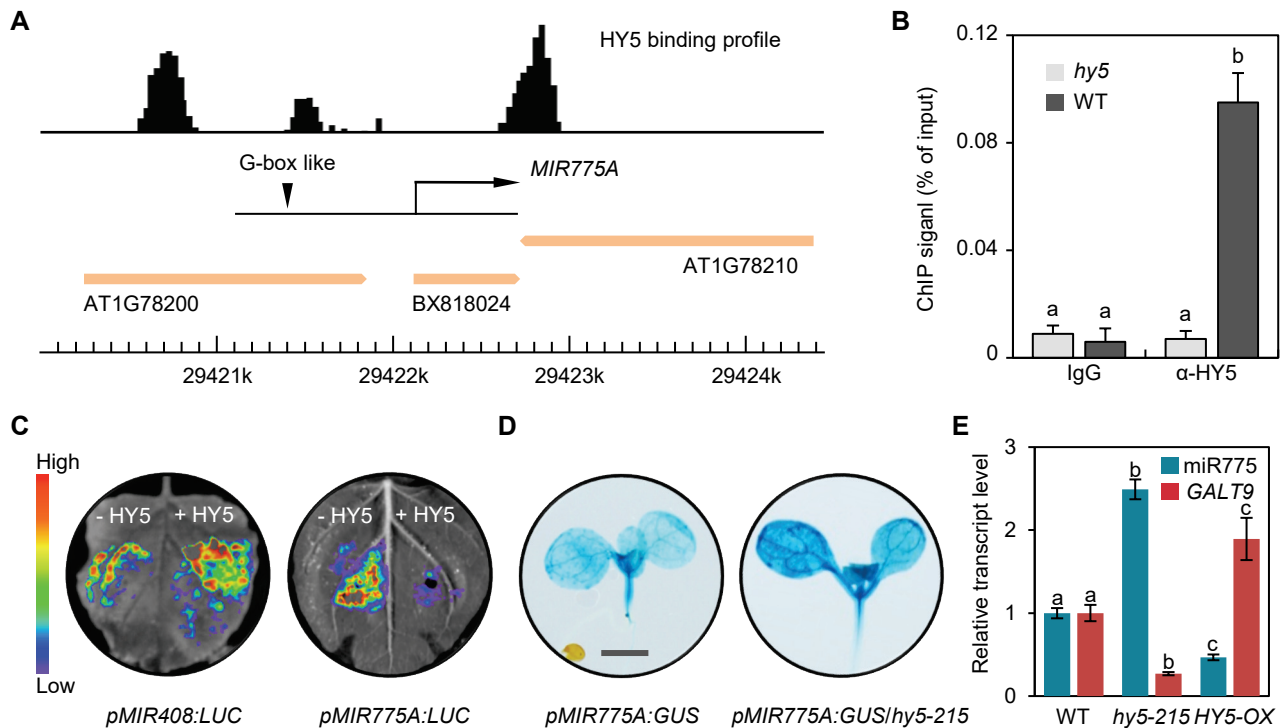

**Figure 10. HY5 Represses *MIR775A* Expression by Directly Binding to Its Promoter.**

(A) HY5 occupancy profile at the *MIR775A* locus. HY5 binding profile is based on global ChIP data mapped onto the *Arabidopsis* genome coordinates. Loci are represented by block arrows. Position of *MIR775A*, defined by the full-length cDNA *BX818024*, is depicted as a black arrow. The triangle marks the G-box like motif. (B) Confirmation of HY5 binding to *pMIR775A* by ChIP-qPCR. ChIP was performed in light-grown wild type and *hy5* seedlings with or without the anti-HY5 antibody. Values are normalized to the respective DNA inputs. Data are  $\pm$  SD from three technical replicates. Different letters denote significant difference (Student's *t*-test,  $p < 0.001$ ). (C) Transient expression assay for testing the effect of HY5 on *pMIR775A* activity. Either the *pMIR775A:LUC* or *pMIR408:LUC* construct was co-infiltrated with the *35S:HY5-GFP* (+HY5) or the vector alone (-HY5) in tobacco epidermal cells and imaged for LUC activity. (D) GUS staining for HY5-dependent *pMIR775A* activity in *A. thaliana*. The same *pMIR775A:GUS* reporter gene was expressed in either the wild type or the *hy5-215* background. Bar, 1 mm. (E) RT-qPCR analysis of the relative *miR775* and *GALT9* transcript abundance in the wild type, *hy5-215*, and *HY5-OX* seedlings. Data are means  $\pm$  SD from three technical replicates. Different letters denote groups with significant difference (Student's *t*-test,  $p < 0.01$ ).

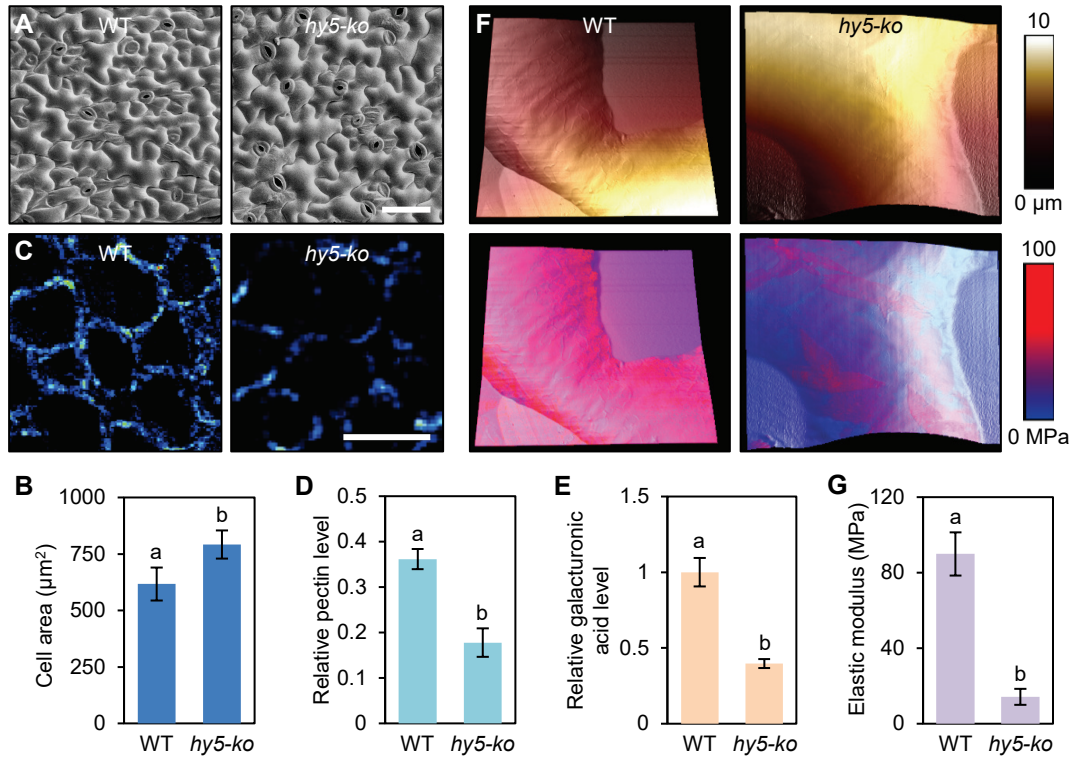

**Figure 11. *HY5* Is a Negative Regulator of Leaf Size.**

(A) Enlargement of the *hy5-ko* epidermal cells in comparison to the wild type. The upper side of the fifth leaf from three-week-old plants was used for cryo-SEM analysis. Bar, 50 μm. (B) Quantification of epidermal cell size. Data are mean ± SD of 100 individual cells from five rosette leaves. Different letters denote significant difference (Student's *t*-test,  $p < 0.001$ ). (C) Imaging pectin in mesophyll cells by confocal Raman microscopy. Bar, 50 μm. (D) Average intensity of Raman images was used to deduce relative pectin levels. Data are mean ± SD of 15 areas from five leaves. Different letters denote significant difference (Student's *t*-test,  $p < 0.01$ ). (E) Quantification of the relative galacturonic acid level in the wild type and *hy5-ko* cell walls. Data are mean ± SD from three technical replicates performed on pooled leaves. Different letters denote significant difference (Student's *t*-test,  $p < 0.01$ ). (F) Topography of the wild type and *hy5-ko* cotyledon epidermal cells mapped by AFM (top) and cell topography overlaid with elasticity (bottom). (G) Quantification of apparent Young's modulus. Each measurement was the average in a 5 μm by 5 μm area of a cell with the highest modulus. Data are mean ± SD of 10 cells from three cotyledons. Different letters denote significant difference (Student's *t*-test,  $p < 0.001$ ).

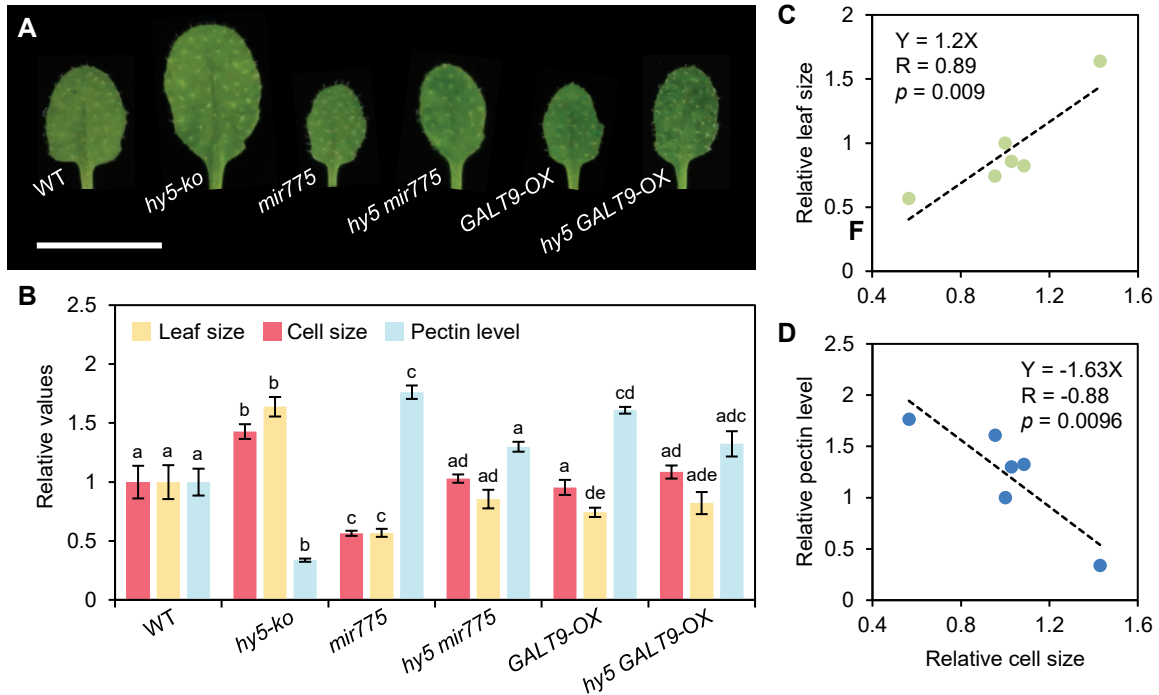

**Figure 12. The *HY5-MIR775A-GALT9* Pathway Regulates Leaf Size.**

(A) Morphology of the fifth rosette leaves of three-week-old plants from the indicated genotypes. Bar, 5 mm. (B) Quantification of the leaf size, epidermal cell size, and pectin level relative to the wild type. Data are mean  $\pm$  SD from 10 individual plants for leaf size, from 100 individual cells of several plants for cell size, and from three technical replicates performed on pooled leaves for galacturonic acid level. Within each set of measurements, different letters denote genotypes with significant difference (Student's *t*-test,  $p < 0.05$  for leaf size;  $p < 0.01$  for cell size and galacturonic acid level). (C-D) Linear regression between cell sizes and organ sizes (C) and between cell sizes and galacturonic acid levels (D) across the six genotypes.

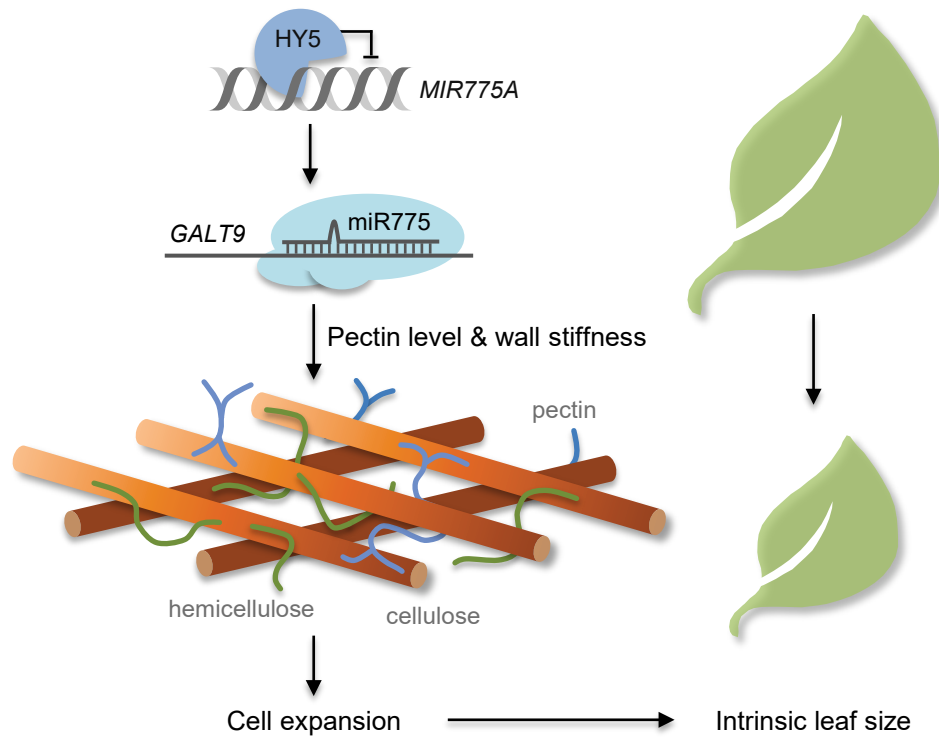

**Figure 13. Model for the *HY5-MIR775A-GALT9* Pathway in Controlling Intrinsic Leaf Size.**

*HY5-MIR775A-GALT9* is a delineated double repression cascade for regulating *GALT9* accumulation for leaf size determination. *GALT9* participates in cell wall remodeling by promoting the pectin constituent and reducing cell wall elasticity, which may prepare the cells with proper resistance to turgor pressure for reaching the intrinsic size during leaf development.

**Supplemental Table 1. Putative CW-miRNAs and Predicted Target Genes in *A. thaliana*.**

| MiRNA   | Target    | Description                                                        |                                |
|---------|-----------|--------------------------------------------------------------------|--------------------------------|
| miR156h | AT5G38610 | PECTIN METHYLESTERASE INHIBITOR                                    |                                |
| miR156i | AT1G13560 | AMINOALCOHOLPHOSPHOTRANSFERASE1                                    |                                |
|         | AT3G01390 | VACUOLAR MEMBRANE ATPASE10                                         |                                |
|         | AT5G38610 | PECTIN METHYLESTERASE INHIBITOR SUPERFAMILY PROTEIN                |                                |
| miR156j | AT2G33040 | GAMMA SUBUNIT OF MITOCHONDRIAL ATP SYNTHASE                        |                                |
|         | AT5G38610 | PECTIN METHYLESTERASE INHIBITOR SUPERFAMILY PROTEIN                |                                |
| miR1886 | AT1G02800 | GLYCOSIDE HYDROLASE FAMILY9                                        |                                |
|         | AT2G36870 | XYLOGLUCAN ENDOTRANSGLYCOSYLASE/HYDROLASE                          |                                |
| miR2936 | AT1G15690 | INORGANIC H PYROPHOSPHATASE FAMILY PROTEIN                         |                                |
|         | AT1G15690 | PYROPHOSPHATE-ENERGIZED INORGANIC PYROPHOSPHATASE                  |                                |
| miR414  | AT1G09210 | CALRETICULIN 1B                                                    |                                |
|         | AT1G56340 | CALRETICULIN 1A                                                    |                                |
|         | AT2G16600 | ROTAMASE CYP3                                                      |                                |
|         | AT3G25520 | RIBOSOMAL PROTEIN L5                                               |                                |
|         | AT4G33740 | MYB-LIKE PROTEIN X                                                 |                                |
|         | AT5G12110 | ELONGATION FACTOR 1-BETA 1                                         |                                |
|         | AT5G13850 | NASCENT POLYPEPTIDE-ASSOCIATED COMPLEX SUBUNIT ALPHA-LIKE PROTEIN3 |                                |
|         | AT5G61790 | CALNEXIN1                                                          |                                |
|         | AT4G33330 | GLUCURONYLTRANSFERASE                                              |                                |
|         | AT2G31210 | BHLH TRANSCRIPTION FACTOR                                          |                                |
|         | AT3G50240 | KINESIN-RELATED PROTEIN                                            |                                |
|         | miR417    | AT5G66460                                                          | ENDO-BETA-MANNANASE            |
|         | miR4227   | AT4G12650                                                          | ENDOMEMBRANE PROTEIN 70 FAMILY |
| miR4239 | AT3G57330 | AUTOINHIBITED Ca <sup>2+</sup> -ATPASE11                           |                                |
| miR5015 | AT1G71040 | LOW PHOSPHATE ROOT2                                                |                                |
| miR5021 | AT1G09330 | ECHIDNA GOLGI APPARATUS MEMBRANE PROTEIN-LIKE PROTEIN              |                                |
|         | AT1G10950 | TRANSMEMBRANE NINE1                                                |                                |
|         | AT1G11310 | SEVEN TRANSMEMBRANE MLO FAMILY PROTEIN                             |                                |
|         | AT1G11680 | CYTOCHROME P450 51G1                                               |                                |
|         | AT1G71940 | SNARE ASSOCIATED GOLGI PROTEIN FAMILY                              |                                |
|         | AT2G18840 | INTEGRAL MEMBRANE YIP1 FAMILY PROTEIN                              |                                |
|         | AT2G20120 | CONTINUOUS VASCULAR RING                                           |                                |
|         | AT2G26680 | FKBM FAMILY METHYLTRANSFERASE                                      |                                |
|         | AT3G08550 | ELONGATION DEFECTIVE1                                              |                                |
|         | AT3G09440 | HEAT SHOCK PROTEIN 70 FAMILY PROTEIN                               |                                |
|         | AT3G21160 | ALPHA-MANNOSIDASE2                                                 |                                |
|         | AT3G26370 | O-FUCOSYLTRANSFERASE FAMILY PROTEIN                                |                                |
|         | AT3G49310 | MAJOR FACILITATOR SUPERFAMILY PROTEIN                              |                                |
|         | AT3G52300 | ATP SYNTHASE D CHAIN                                               |                                |
|         | AT4G30190 | H(+)-ATPASE2                                                       |                                |

|          |           |                                                                     |
|----------|-----------|---------------------------------------------------------------------|
|          | AT4G30440 | UDP-D-GLUCURONATE 4-EPIMERASE1                                      |
|          | AT4G34180 | CYCLASE FAMILY PROTEIN                                              |
|          | AT5G20350 | TIP GROWTH DEFECTIVE1                                               |
|          | AT5G51570 | SPFH/BAND 7/PHB DOMAIN-CONTAINING MEMBRANE-ASSOCIATED PROTEIN       |
|          | AT5G23870 | PECTIN ACETYLESTERASE FAMILY PROTEIN                                |
|          | AT5G26670 | PECTIN ACETYLESTERASE FAMILY PROTEIN                                |
|          | AT3G26370 | O-FUCOSYLTRANSFERASE FAMILY PROTEIN                                 |
|          | AT1G24170 | GALACTURONOSYLTRANSFERASE                                           |
|          | AT4G36160 | NAC-DOMAIN TRANSCRIPTION FACTOR                                     |
|          | AT5G33290 | XYLOGALACTURONAN XYLOSYLTRANSFERASE                                 |
|          | AT4G02130 | GALACTURONOSYLTRANSFERASE                                           |
|          | AT5G61130 | CALLOSE BINDING                                                     |
|          | AT1G53000 | NUCLEOTIDE-DIPHOSPHO-SUGAR TRANSFERASES SUPERFAMILY PROTEIN         |
| miR5628  | AT2G02860 | SUCROSE TRANSPORTER2                                                |
| miR5630b | AT1G33120 | RIBOSOMAL PROTEIN L6 FAMILY                                         |
| miR5658  | AT1G14670 | ENDOMEMBRANE PROTEIN 70 FAMILY                                      |
|          | AT1G32090 | EARLY-RESPONSIVE TO DEHYDRATION4                                    |
|          | AT3G27220 | GALACTOSE OXIDASE/KELCH REPEAT SUPERFAMILY PROTEIN                  |
|          | AT3G47670 | PLANT INVERTASE/PECTIN METHYLESTERASE INHIBITOR SUPERFAMILY PROTEIN |
|          | AT4G11220 | VIRB2-INTERACTING PROTEIN2                                          |
|          | AT5G55500 | BETA-1,2-XYLOSYLTRANSFERASE                                         |
|          | AT5G57655 | XYLOSE ISOMERASE FAMILY PROTEIN                                     |
|          | AT1G05310 | PECTIN LYASE-LIKE SUPERFAMILY PROTEIN                               |
|          | AT2G06850 | ENDOXYLOGLUCAN TRANSFERASE EXGT-A1                                  |
|          | AT3G54920 | PECTATE LYASE-LIKE PROTEIN                                          |
|          | AT4G29230 | NAC DOMAIN CONTAINING PROTEIN75                                     |
|          | AT1G62760 | PECTIN METHYLESTERASE INHIBITOR                                     |
|          | AT1G20190 | ALPHA-EXPANSIN FAMILY PROTEIN                                       |
|          | AT3G06260 | GALACTURONOSYLTRANSFERASE                                           |
|          | AT5G62380 | NAC-DOMAIN TRANSCRIPTION FACTOR                                     |
|          | AT3G62660 | GALACTURONOSYLTRANSFERASE                                           |
| miR5662  | AT3G49010 | BREAST BASIC CONSERVED1                                             |
| miR773b  | AT2G26890 | GRAVITROPISM DEFECTIVE2                                             |
| miR775   | AT1G53290 | GALACTOSYLTRANSFERASE                                               |
| miR776   | AT2G32530 | CELLULOSE SYNTHASE                                                  |
| miR827   | AT1G63010 | VACUOLAR PHOSPHATE TRANSPORTER1                                     |
| miR837   | AT5G24810 | ABC1 FAMILY PROTEIN                                                 |
| miR838   | AT1G43170 | RIBOSOMAL PROTEIN1                                                  |
|          | AT1G51630 | O-FUCOSYLTRANSFERASE FAMILY PROTEIN                                 |
|          | AT1G51630 | PRENYLATED RAB ACCEPTOR 1.B1                                        |
| miR854e  | AT3G56110 | PRENYLATED RAB ACCEPTOR1                                            |
| miR861   | AT3G58730 | VACUOLAR ATP SYNTHASE SUBUNIT D                                     |
|          | AT1G71990 | LEWIS-TYPE ALPHA 1,4-FUCOSYLTRANSFERASE                             |

---

**Supplemental Table 2. Oligonucleotide Sequences of the Primers Used in This Study.**

| No.                   | For plasmid construction | Sequence (5 to 3)                                       |
|-----------------------|--------------------------|---------------------------------------------------------|
| 1                     | MIR775-OX-F              | GCTCTAGACGCTTGTCTTCTTCTTTGCTGAT                         |
| 2                     | MIR775-OX -R             | GGGGTACCCCTCATTTTCACATTACCACTTCGT                       |
| 3                     | MIR775-sgRNA1-F          | GATTGGCGGTTGGCGACTGAATAAG                               |
| 4                     | MIR775-sgRNA1-R          | AAACCTTATTCAGTCGCCAACC GCC                              |
| 5                     | MIR775-sgRNA2-F          | GATTGTATCAGTTGATTTAAACAT                                |
| 6                     | MIR775-sgRNA2-R          | AAACATGTTTAAAATCAACTGATAC                               |
| 7                     | pMIR775-F                | GGGAAAGCTTTGTGGATAG                                     |
| 8                     | pMIR775-R                | CATCAAGAACACGATTATG                                     |
| 9                     | pre-miR775-F             | GCTCTAGACGTTGCACTACGTGACATTGA                           |
| 10                    | pre-miR775-R             | CATGCCATGGTGGCACTGCTAGACATCGAAA                         |
| 11                    | GALT9-OX-F               | GGGTCTAGAATGCATTCTCCTCGTAAGCT                           |
| 12                    | GALT9-OX-R               | AAAGGTACCTTCATCATCTGATGGCAAAG                           |
| 13                    | GALT9-sgRNA1-exon1-F     | GATTGACTCGCCCGCGCCGATCAA                                |
| 14                    | GALT9-sgRNA1-exon1-R     | AAACTTGATCGGCGCGTGGCGAGTC                               |
| 15                    | GALT9-sgRNA2-3UTR-F      | GATTGCTTTATAAACCTCTTCTCAG                               |
| 16                    | GALT9-sgRNA2-3UTR-R      | TCGACCTGCAGGCATGCAAGCTTGTCACGATTCTTACGCCCT              |
| 17                    | GALT9-fLuc-N             | CATGCCATGGTTCGACTGCTAGATATCGAAGACGCCAAAAACATAAAGAAAGGCC |
| 18                    | GALT9m-fLuc-N            | CATGCCATGGGCGTACTCGATCATATGGAAGACGCCAAAAACATAAAGAAAGGCC |
| 19                    | GALT9-GFP-F              | TGAACTAGTATGCATTCTCCTCGTAAGC                            |
| 20                    | GALT9-GFP-R              | GCCACGCGTTCATCATCTGATGGCA                               |
| 21                    | GALT9-CDS-F              | ATGCATTCTCCTCGTAAGCTA                                   |
| 22                    | GALT9-CDS-R              | TCATTATCATCTGATGGCAA                                    |
| 23                    | GALT9-Bsite-mutation-F   | TTCGTTCTCCTCGACATAGAGGAGGAGTAC                          |
| 24                    | GALT9-Bsite-mutation-R   | CTCTATGTCGAGGAGAACGAAGTCATCATA                          |
| 25                    | GALT9-mutation-F         | TTTGTCTACTGGACATAGAG                                    |
| 26                    | GALT9-mutation-R         | GAAATCGCAGAGTATGATGAC                                   |
| 27                    | C-GFP-1305.1-F           | TGAACTAGTATGCATTCTCCTCGTAAGC                            |
| 28                    | C-GFP-1305.1-R           | GCCACGCGTTCATCATCTGATGGCA                               |
| 29                    | pGALT9-F                 | GCATGCAAGCTTACATTTTGAGTCCGAT                            |
| 30                    | pGALT9-R                 | GCCGCCGCCACGCGTGTGTGCCTAC                               |
| 31                    | sgHY5-2-1F               | ATTGTGTTGTCTTAGTAGCGAAGC                                |
| 32                    | sgHY5-2-1R               | AAACGCTTCGCTACTAAGACAACA                                |
| 33                    | sgHY5-3-F                | ATTGAAGACTACAATAAGAGAACT                                |
| 34                    | sgHY5-3-R                | AAACAGTTCCTTATTGTAGTCTT                                 |
| <b>For RT-qPCR</b>    |                          |                                                         |
| 35                    | 5sRNA-F                  | GATGCGATCATACCAGCACTAA                                  |
| 36                    | 5sRNA-R                  | GATGCAACACGAGGACTTCCC                                   |
| 37                    | miR775_qPCR_F            | GCTTCGATGTCTAGCAGTGCCA                                  |
| 38                    | Actin7-F                 | GGTGTTCATGGTTGGTATGGGTC                                 |
| 39                    | Actin7-R                 | CCTCTGTGAGTAGAACTGGGTGC                                 |
| 40                    | GALT9-qPCR_F             | TATCGAAGAGGAGTACAGTAAG                                  |
| 41                    | GALT9-qPCR_R             | TAGCAGAGAGAGTCGATCTG                                    |
| 42                    | HY5-qRT-F                | CCATCAAGCAGCGAGAGGTCATCAA                               |
| 43                    | HY5-qRT-R                | CGCCGATCCAGATTCTTACC GGAA                               |
| <b>For genotyping</b> |                          |                                                         |
| 44                    | 5 RACE -RPM-F            | CTAATACGACTCACTATAGGGCAAGCAGTGGTATCAACGCAGAGT           |
| 45                    | GALT9-GSP-R              | GATTACGCCAAGCTTATTCATTGCCAGCATCCACGCACCT                |
| 46                    | Lb1.3                    | ATTTTGCCGATTTTCGGAAC                                    |
| 47                    | SALK015338-LP            | GATGGCTAACCCCGTAGATTC                                   |
| 48                    | SALK015338-RP            | TGCGATAGCTGGTAGACAACAC                                  |
| 49                    | MIR775-KO-F              | TGACTCTCATGGCTGTGTGCTAG                                 |
| 50                    | MIR775-KO-R              | AGCTTGTAGGGGAAAGGGAGATAG                                |
| 51                    | GALT9-KO-F               | TCGAGCTTCTTGACACCAC                                     |

|    |              |                        |
|----|--------------|------------------------|
| 52 | GALT9-KO-R   | TGCAGGTTGCTCGAAGAAA    |
| 53 | hy5_215-F    | GTCATCAAGCTCTGCTCCACAT |
| 54 | hy5_215-R    | AAGACACCTCTTCAGCCGCTTG |
| 55 | HY5-CRISPR-F | CAGAGATCTGACGGCGGTA    |
| 56 | HY5-CRISPR-R | CCTTTCTACTACAGTGTCAC   |

---



**A**

```

A. lyrata      AATATAA-----GATGGTGACGAACGACTGAATAAAATGACTTAAAC--TGCGGTTACGTGGTCATTTGAGAACTGTGATGAGT
A. thaliana (Col-0) AACATCATGGCGGTGG-----CGACTGAATAAGAGGATTTAAACGTTGC-ACTACGT-GACA-TTGA-AACTGT-----
A. thaliana (Cvi-0) AACATCNTGGCGGTGG-----CGACTGAATAAGAGGATTTAAACGTTGC-ACTACGT-GACA-TTGA-AACTGT-----
A. thaliana (Bur-0) AACATCNTGGCGGTGG-----CGACTGAATAAGAGGATTTAAACGTTGC-ACTACGT-GACA-TTGA-AACTGT-----
A. thaliana (Ler-0) AACATCNTGGCGGTGG-----CGACTGAATAAGANNNNTTAAACGTTGC-ACTACGT-GACA-TTGA-AACTGT-----
A. thaliana (Ws-0) AACATCNTGGCGGTGG-----CGACTGAATAAGAGGATTTAAACGTTGC-ACTACGT-GACA-TTGA-AACTGT-----

A. lyrata      ATACAATGGTTTTTATGCTCAGCACAATTTTCAAAGCATCTCTATGTTTATGCTCATCACAGTTCTTGATTACCCACTAAACCG
A. thaliana (Col-0) -----CTTTCAA--CATTCCAATATTT-----CAACTTTCGAATACCCAATATTTGG
A. thaliana (Cvi-0) -----CTTTCAA--CATTCCAATATTT-----CAACTTTCGAATACCCAATATTTGG
A. thaliana (Bur-0) -----CTTTCAA--CATTCCAATATTT-----CAACTTTCGAATACCCAATATTTGG
A. thaliana (Ler-0) -----CTTTCAA--CATTCCAATATTT-----CAACTTTCGAATACCCAATATTTGG
A. thaliana (Ws-0) -----CTTTCAA--CATTCCAATATTT-----CAACTTTCGAATACCCAATATTTGG

A. lyrata      ATGTTTAAAAACCTTT-----ATGTTT-AAACCAA---ATTATTTGTCTCCCAT---ATT-ATCCGT
A. thaliana (Col-0) TTTGTTCAAAGACATTTTCGATGTCTAGCAGTGCCAATGTTTAAATCAACTGATAATTT-----TGGAATTAATGTGT
A. thaliana (Cvi-0) TTTGTTNAAAGACATTTTCGATGTCTAGCAGTGCCAATGTTNAAAATCANCTGATAATTT-----TGGAATTAATGTGT
A. thaliana (Bur-0) TTTGTTNAAAGACATTTTCGATGTCTAGCAGTGCCAATGTTNAAAATCANCTGATAATTT-----TGGAATTAATGTGT
A. thaliana (Ler-0) TTTGTTNAAAGACATTTTCGATGTCTAGCAGTGCCAATGTTNAAAATCANCTGATAATTT-----TGGAATTAATGTGT
A. thaliana (Ws-0) TTTGTTNAAAGACATTTTCGATGTCTAGCAGTGCCAATGTTNAAAATCANCTGATAATTT-----TGGAATTAATGTGT
    
```

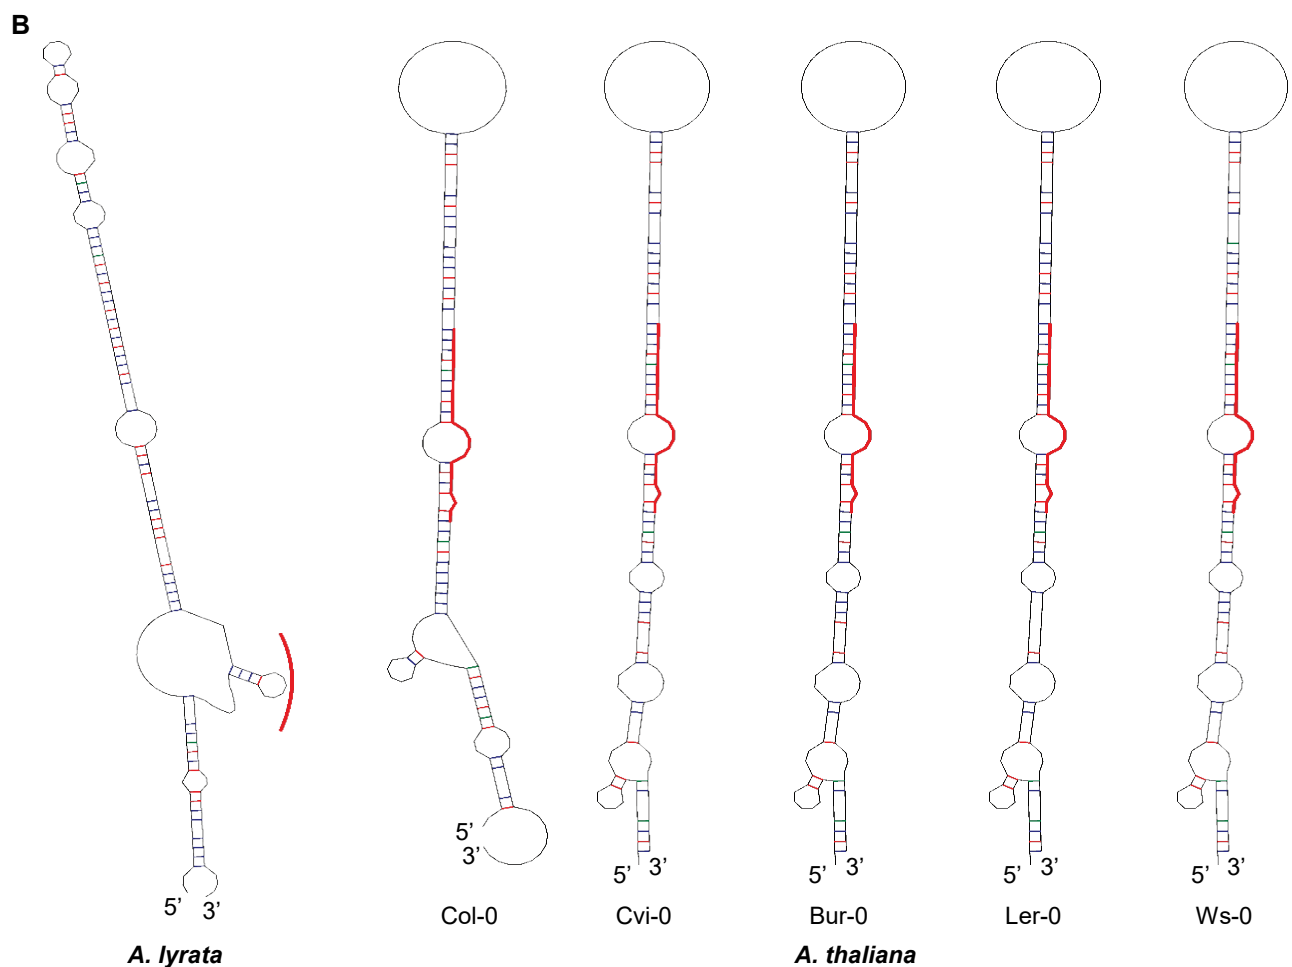

**Supplemental Figure 1. Comparison of Pre-miR775a Homologs in *A. thaliana* and *A. lyrata*.**

(A) Alignment of pre-miR775a sequences from five representative *A. thaliana* ecotypes with the closest homolog in *A. lyrata*. Sequences are 29,422,419-29,422,603 on *A. thaliana* (Col-0) chromosome 1 and 18,060,424-18,060,639 on *A. lyrata* chromosome 2. Region corresponding to mature miR775 is underlined in red. (B) Predicted secondary structures from sequences in A. Red lines indicate the region corresponding to miR775 in *A. thaliana*. Supports Figure 1 in the main manuscript.

A

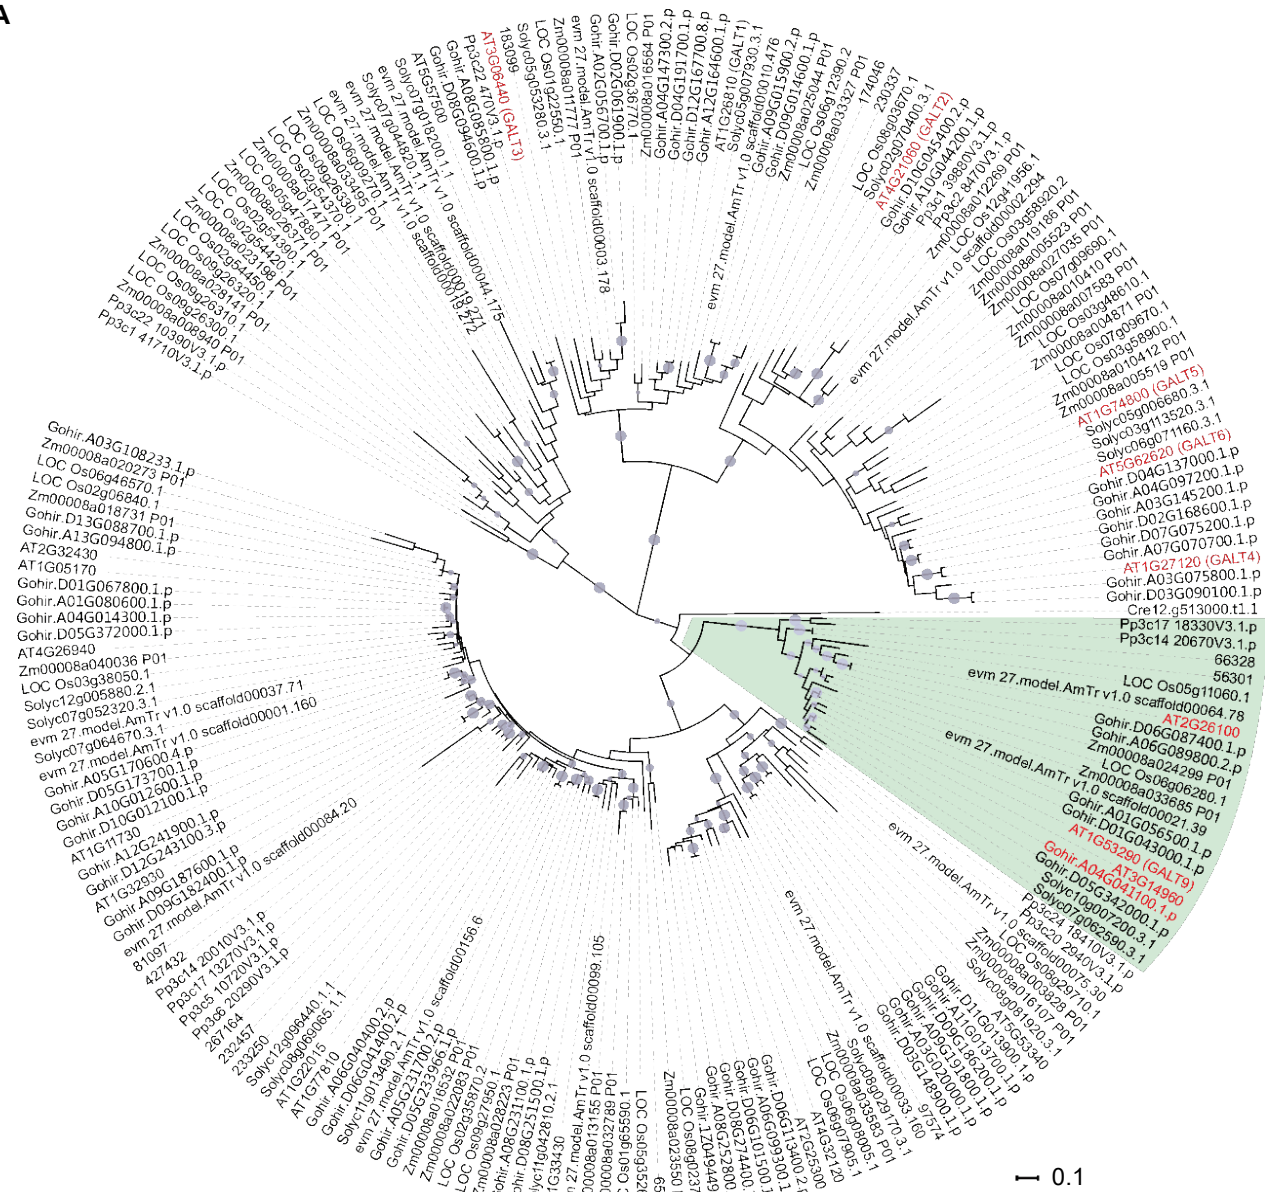

B

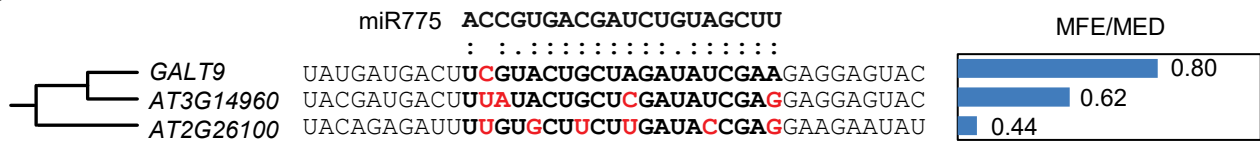

### Supplemental Figure 2. MiR775 Specifically Targets GALT9 in *A. thaliana*.

(A) Phylogeny of representative members of the glycosyltransferase 31 family. Shown is an unrooted neighbor joining tree built with the JTT model. Bootstrap values are from 1,000 iterations. Circles indicate branches with a bootstrap value > 60. The clade containing *GATL9* is shade in green. Genes known for involvement in primary cell wall biosynthesis are highlighted in red. (B) Sequence alignment at the miR775 binding site, shown in bold, between *GALT9* and two closest homologs in *A. thaliana*. Nucleotides undermining complementarity with miR775 are shown in red. The MFE/MED ratios are shown on the right, which indicate that only *GALT9* is a potential target for miR775. Supports Figure 1 in the main manuscript.

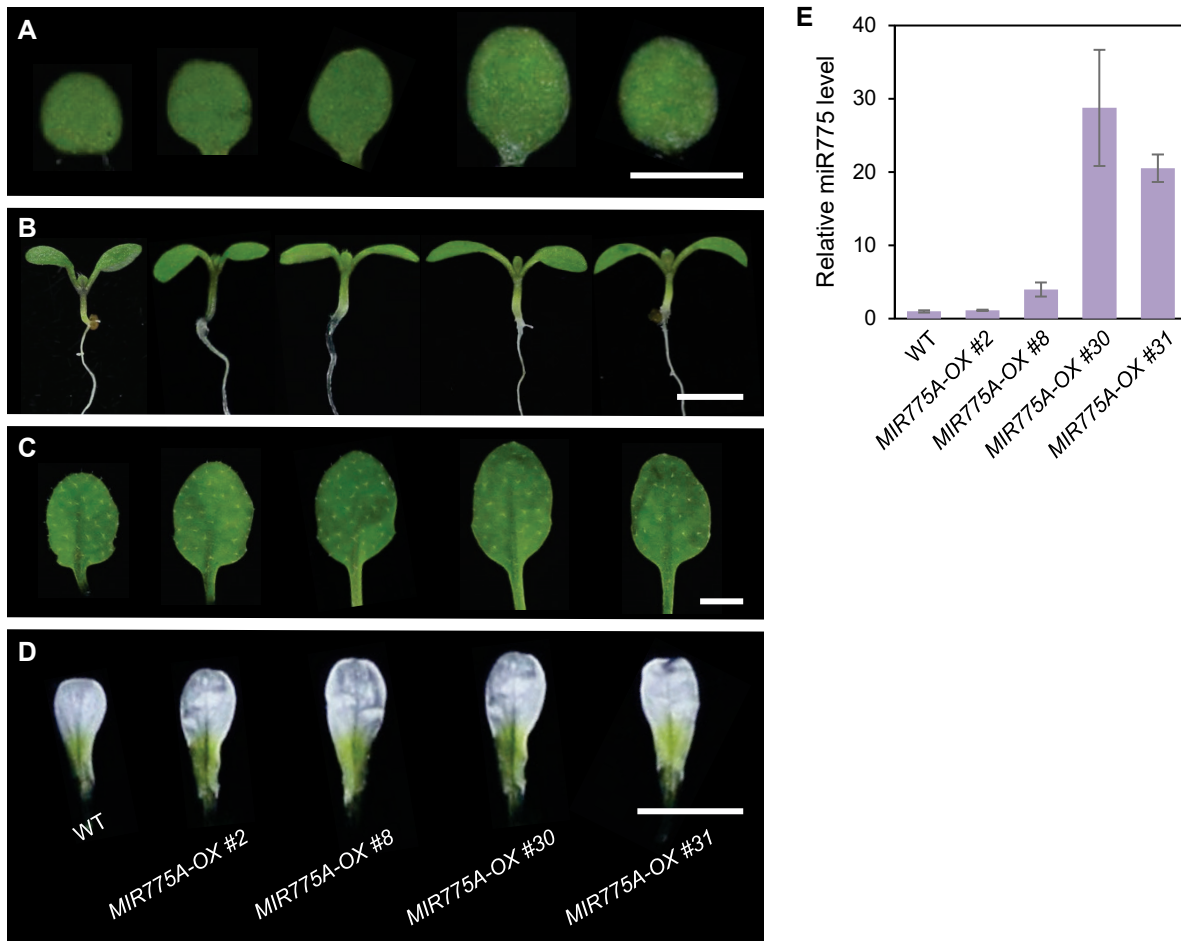

### Supplemental Figure 3. Characterization of *MIR775A-OX* Lines.

(A-D) Morphological comparison of the indicated lines. Shown are cotyledon of eight-day-old seedlings (A), seedling showcasing the hypocotyl (B), the fifth rosette leaf of three-week-old plants (C), and petal of open flowers (D). Bars, 2 mm. *MIR775A-OX* was generated by expressing the *35S:pre-miR775a* transgene (*pre-miR775a* under control of the enhanced *35S* promoter) in *A. thaliana*. Seventeen independent  $T_1$  lines were obtained and four further analyzed at the  $T_2$  generation. Line #8 was selected for subsequent analyses. (E) RT-qPCR analysis of relative miR775 abundance in the selected lines. Data are means  $\pm$  SD from three technical replicates. Supports Figures 2-4 in the main manuscript.

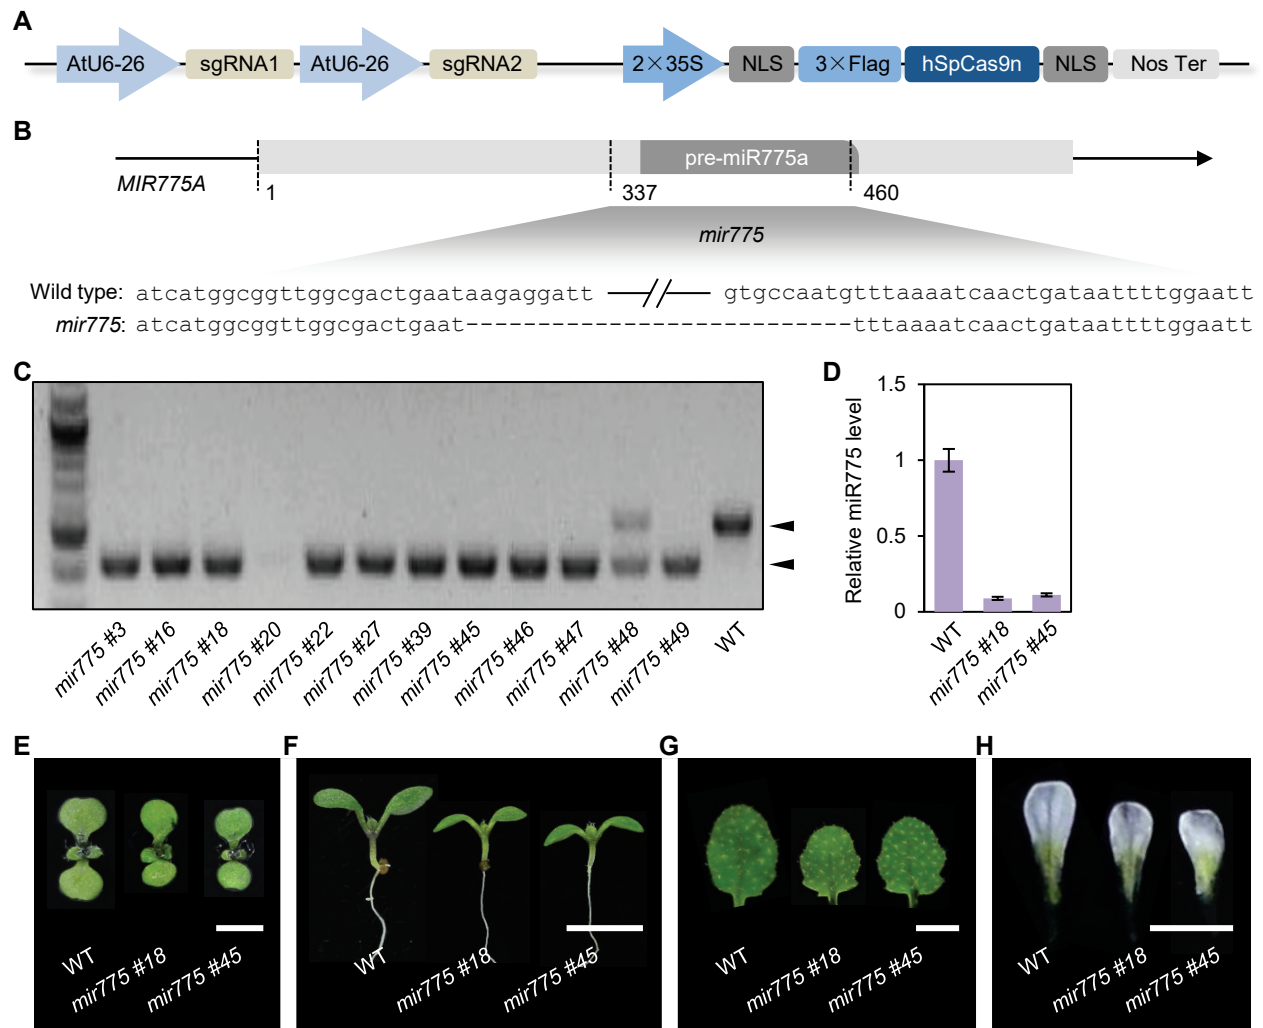

#### Supplemental Figure 4. Generation and Characterization of the *mir775* Mutant Lines.

(A) Diagram showing the CRISPR/Cas9 vector for simultaneously introducing Cas9 with paired sgRNAs. (B) Scheme for generating *mir775* deletion using the CRISPR/Cas9 system. Numbers mark positions according to the full length cDNA *BX818024*. The paired sgRNAs are designed to delete a 123 bp region encompassing pre-miR775a. Sequence comparison for a typical deletion allele with reference to the wild type allele is shown on the bottom. (C) Genotyping result for 10 independent homozygous *mir775* lines. Genomic DNA from individual deletion lines was PCR-amplified and gel-separated. Size polymorphisms according to the wild type and deletion alleles are indicated. Lines #18 and #45 were selected for subsequent analyses. (D) RT-qPCR analysis of relative miR775 abundance in the two selected lines. Data are means  $\pm$  SD from three technical replicates. (E-H) Morphological comparison of the indicated lines. From left to right: eight-day-old seedlings showcasing the cotyledon (E), seedlings showcasing the hypocotyl (F), the fifth rosette leaves of three-week-old plants (G), and petals of open flowers (H). Bars, 2 mm. Supports Figures 3 and 4 in the main manuscript.

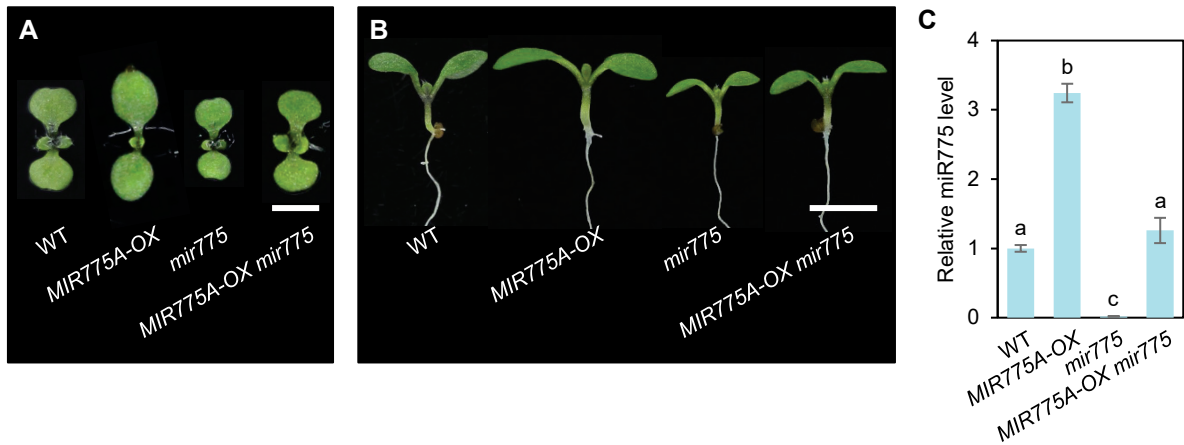

### Supplemental Figure 5. Characterization of the *MIR775A-OX mir775* Line.

(A-B) Morphological comparison of the indicated genotypes. Eight-day-old seedlings were photographed to showcase the cotyledon (A) and the hypocotyl (B). *MIR775A-OX mir775* was created by crossing  $T_3$  generation *MIR775A-OX* line #8 to *mir775*.  $F_2$  progenies homozygous for *mir775* and resistant to BASTA (*MIR775A-OX* positive) were selected for analyses. Bars, 2 mm. (C) RT-qPCR analysis of relative miR775 abundance in the indicated genotypes. Data are means  $\pm$  SD from three technical replicates. Different letters denote groups with significant difference (Student's *t*-test,  $p < 0.001$ ). Supports Figures 3 and 4 in the main manuscript.

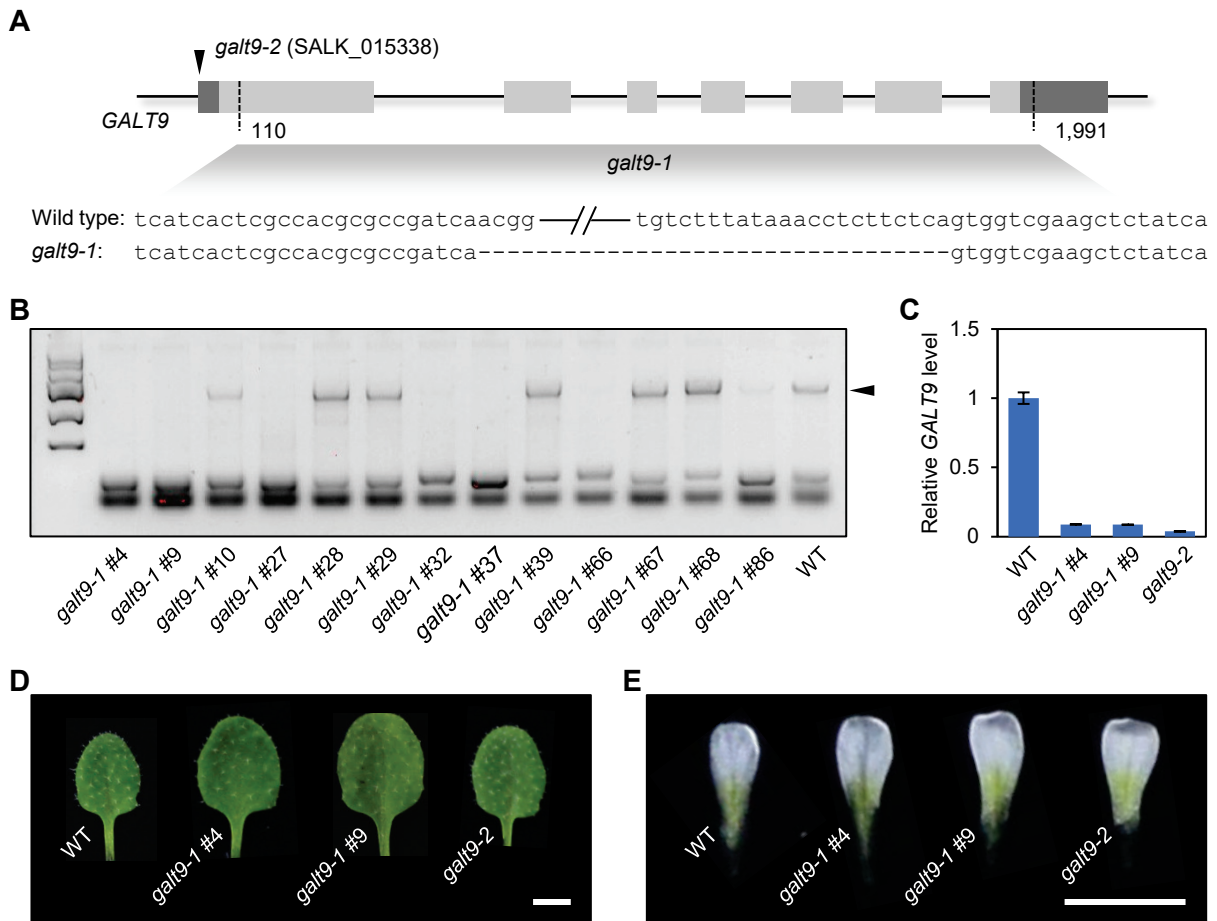

### Supplemental Figure 6. Generation and Characterization of the *galt9* Mutant Lines.

(A) Scheme for generating *galt9* deletion mutants using the CRISPR/Cas9 system. Exons of *GALT9* are shown as horizontal boxes. Two sgRNAs are designed to create paired cleavage sites positioned at 110 and 1,991, resulting in a 1,882 bp deletion. The corresponding mutant was named *galt9-1*. A T-DNA insertion line (SALK\_015338) with the T-DNA inserted into the start codon was named *galt9-2*. (B) Genotyping result for the deletion lines. A total of seven independent homozygous lines were identified. PCR product corresponding to the wild type allele is marked. Lines #4 and #9 were selected for subsequent analyses. (C) RT-qPCR analysis of relative *GALT9* transcript levels in the indicated lines in comparison to the wild type. Data are means  $\pm$  SD from three technical replicates. (D-E) Morphology of the fifth rosette leaf (D) and petal (E) of the indicated genotypes. Bars, 2 mm. Supports Figures 3 and 4 in the main manuscript.

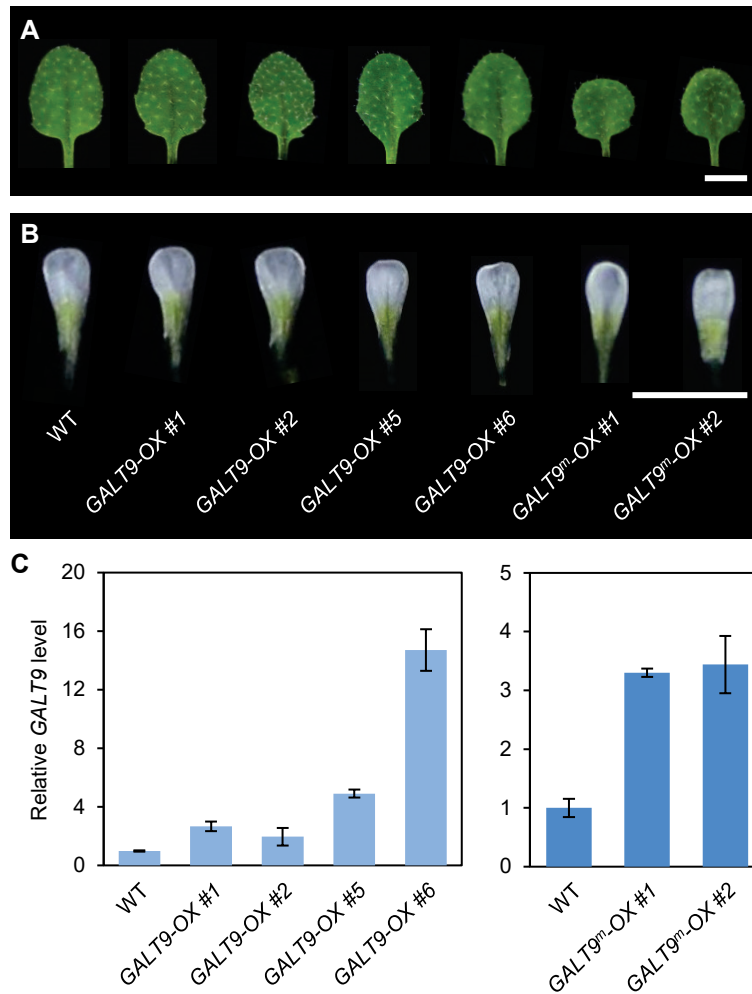

### Supplemental Figure 7. Characterization of the *GALT9*-OX Lines.

(A-B) Morphological comparison of the fifth rosette leaf from three-week-old plants (A) and petal from open flowers (B). Bars, 2 mm. *GALT9*-OX was generated by expressing the *GALT9* coding region under control of the enhanced 35S promoter in *A. thaliana*. Twelve independent T<sub>1</sub> lines were obtained and four further analyzed at the T<sub>2</sub> generation. *GALT9<sup>m</sup>*-OX was generated by substituting the nucleotides of the miR775 binding site in *GALT9* but not the encoded amino acids. Six independent T<sub>1</sub> lines were obtained and two further analyzed at the T<sub>2</sub> generation. (C) RT-qPCR analysis of relative *GALT9* transcript levels in the indicated lines in comparison to the wild type. Data are means ± SD from three technical replicates. Supports Figures 3 and 4 in the main manuscript.

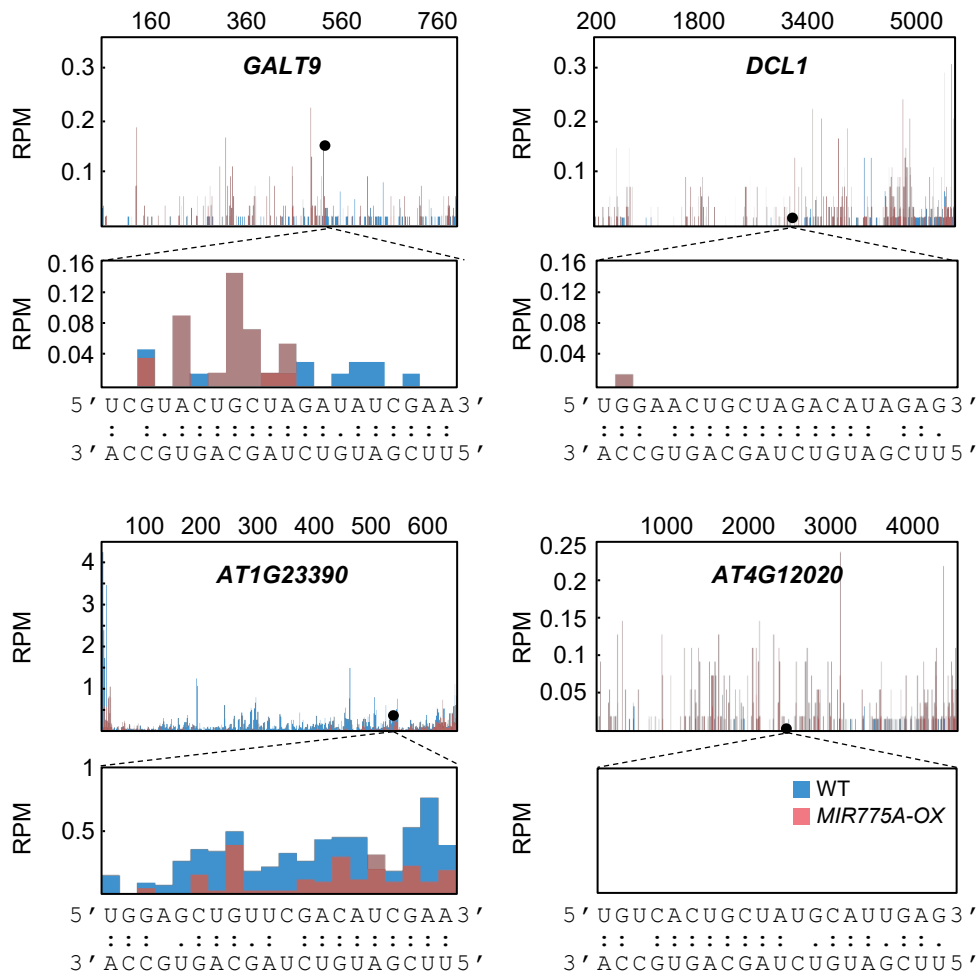

### Supplemental Figure 8. Degradome Sequencing Profiles of Predicted MiR775 Targets.

Degradome sequencing data were obtained from the wild type and *MIR775A-OX* plants. Shown on top are normalized frequencies of reads with unique 5' ends mapped to the four potential miR775 target genes. Enlarged views at the predicted miR775-binding sites are shown on the bottom along with base pairing pattern to miR775. Supports Figure 2 in the main manuscript.



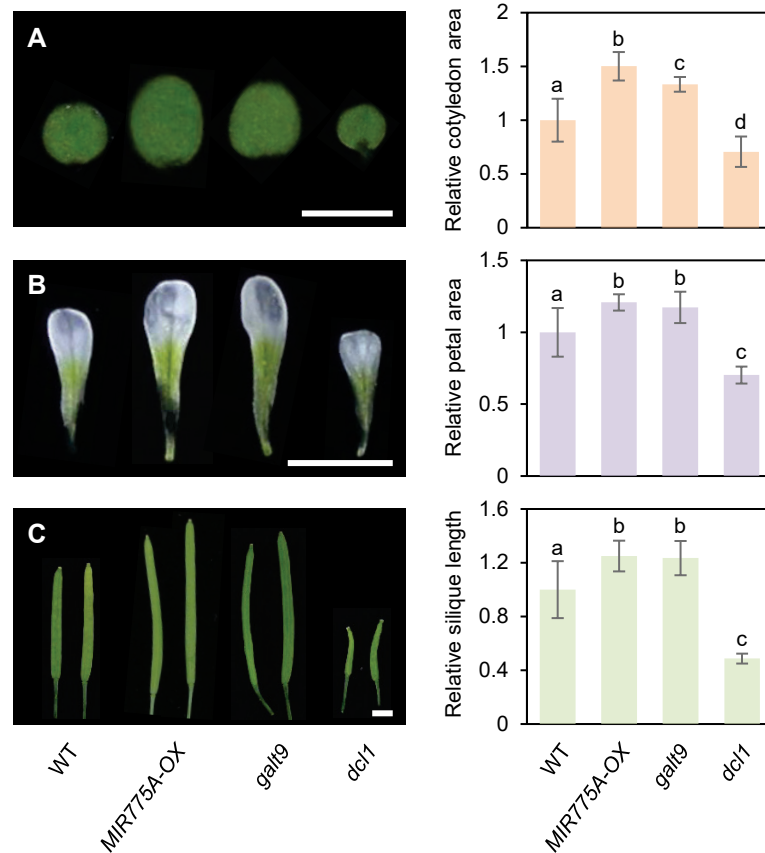

**Supplemental Figure 9. Phenotypic Comparison of the *galt9* and *dcl1* Mutants.**

(A-C) Morphological comparison of the indicated genotypes. Photographs of eight-day-old cotyledons (A), petals of open flowers (B), and mature siliques (C) are shown on the left. Bars, 2 mm. Quantifications of the relative cotyledon area, petal area, and silique length are shown on the right. Data are means  $\pm$  SD from 30 individual organs normalized to the wild type. Different letters denote genotypes with significant difference (Student's *t*-test,  $p < 0.01$ ). Supports Figures 2-4 in the main manuscript.

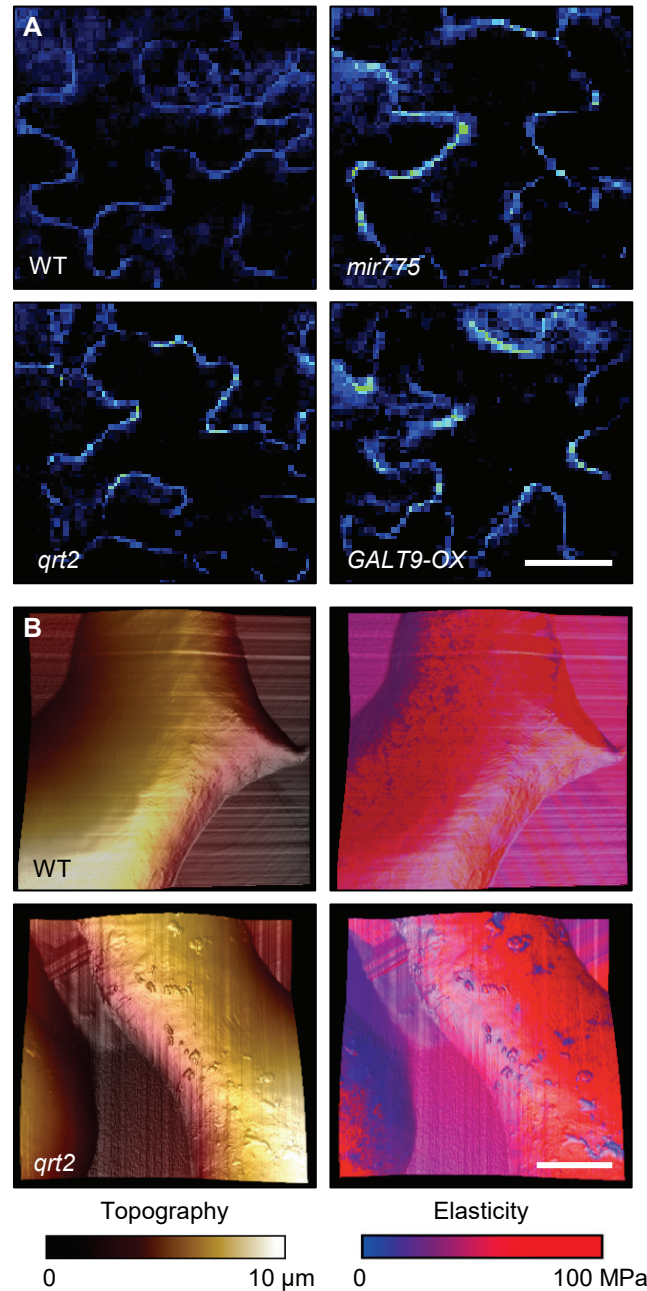

**Supplemental Figure 10. Analysis of the *qrt2* Mutant Defective in Pectin Turnover.**

(A) Examination of cell wall pectin by Raman microscopy. Cotyledon cells of seven-day-old wild type, *mir775*, *GALT9-OX*, and *qrt2* seedlings were imaged for pectin. Bar, 20 μm. (B) Topography of the wild type and *qrt2* cotyledon epidermal cells mapped by AFM (left) and topography overlaid with elasticity (right). Bar, 5 μm. Supports Figures 8 and 9 in the main manuscript.

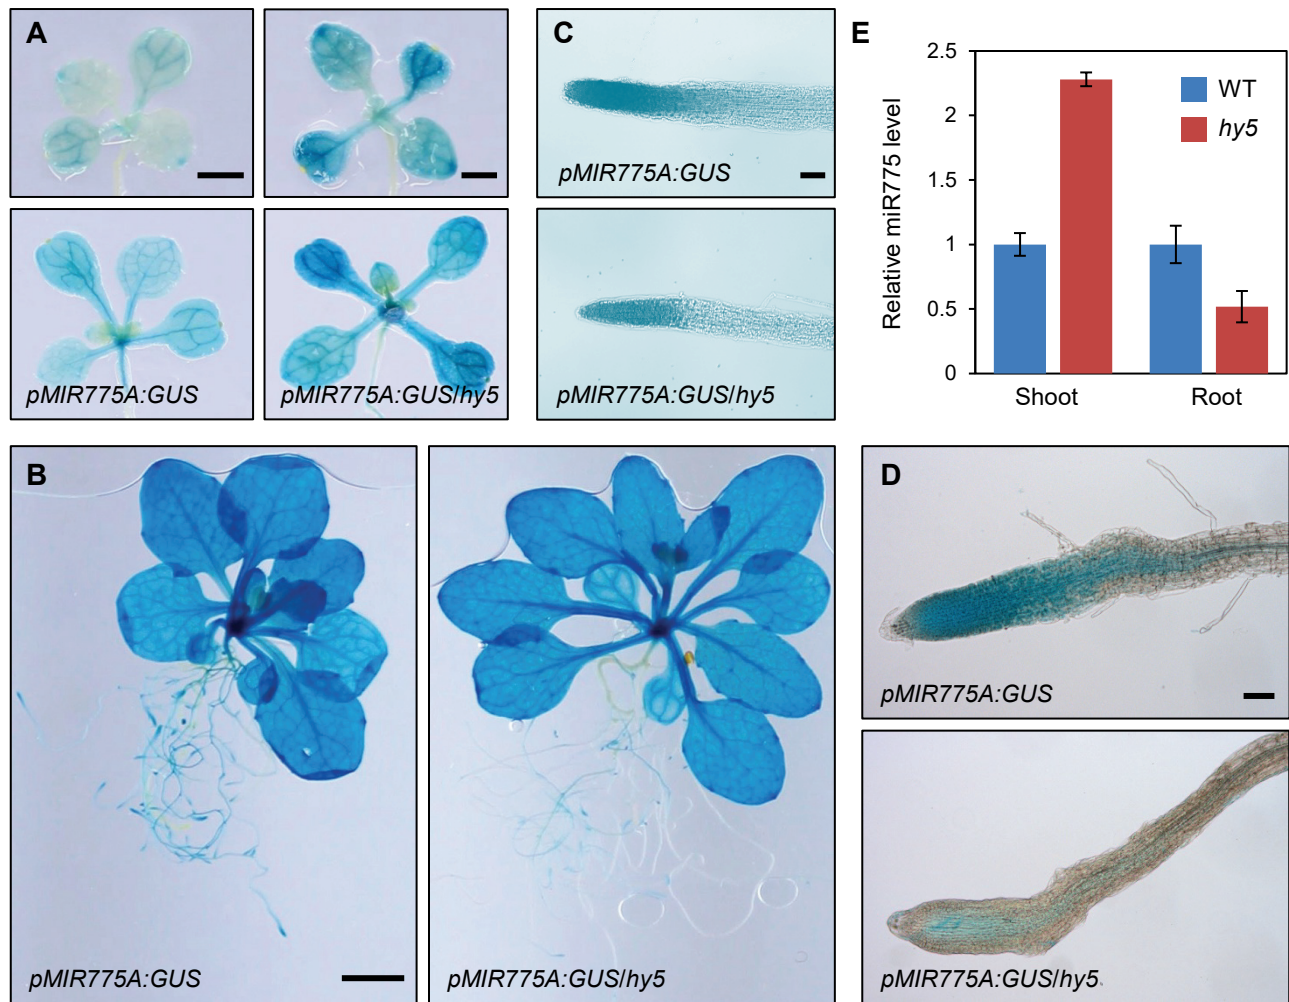

**Supplemental Figure 11. *HY5* Differentially Regulates *MIR775A* in the Shoot and the Root.**

(A) GUS staining for *pMIR775A* activities in the wild type and *hy5-215* backgrounds. Ten- (left) and 12-day-old (right) *pMIR775A:GUS* and *pMIR775A:GUS/hy5-215* seedlings (right) were stained for GUS activity. Bars, 1 mm. (B) The *pMIR775A:GUS* and *pMIR775A:GUS/hy5* adult plants with approximately ten true leaves were stained for GUS activity. Bar, 2 cm. (C-D) Root tips of *pMIR775A:GUS* and *pMIR775A:GUS/hy5* at the seedling (C) and adult (D) stages were compared for GUS activity. Bars, 50  $\mu$ m. (E) Quantitative analysis of relative miR775 levels separately in the shoot and the root of wild type and *hy5-215* seedlings by RT-qPCR. Data are means  $\pm$  SD from three technical replicates. Supports Figure 10 in the main manuscript.

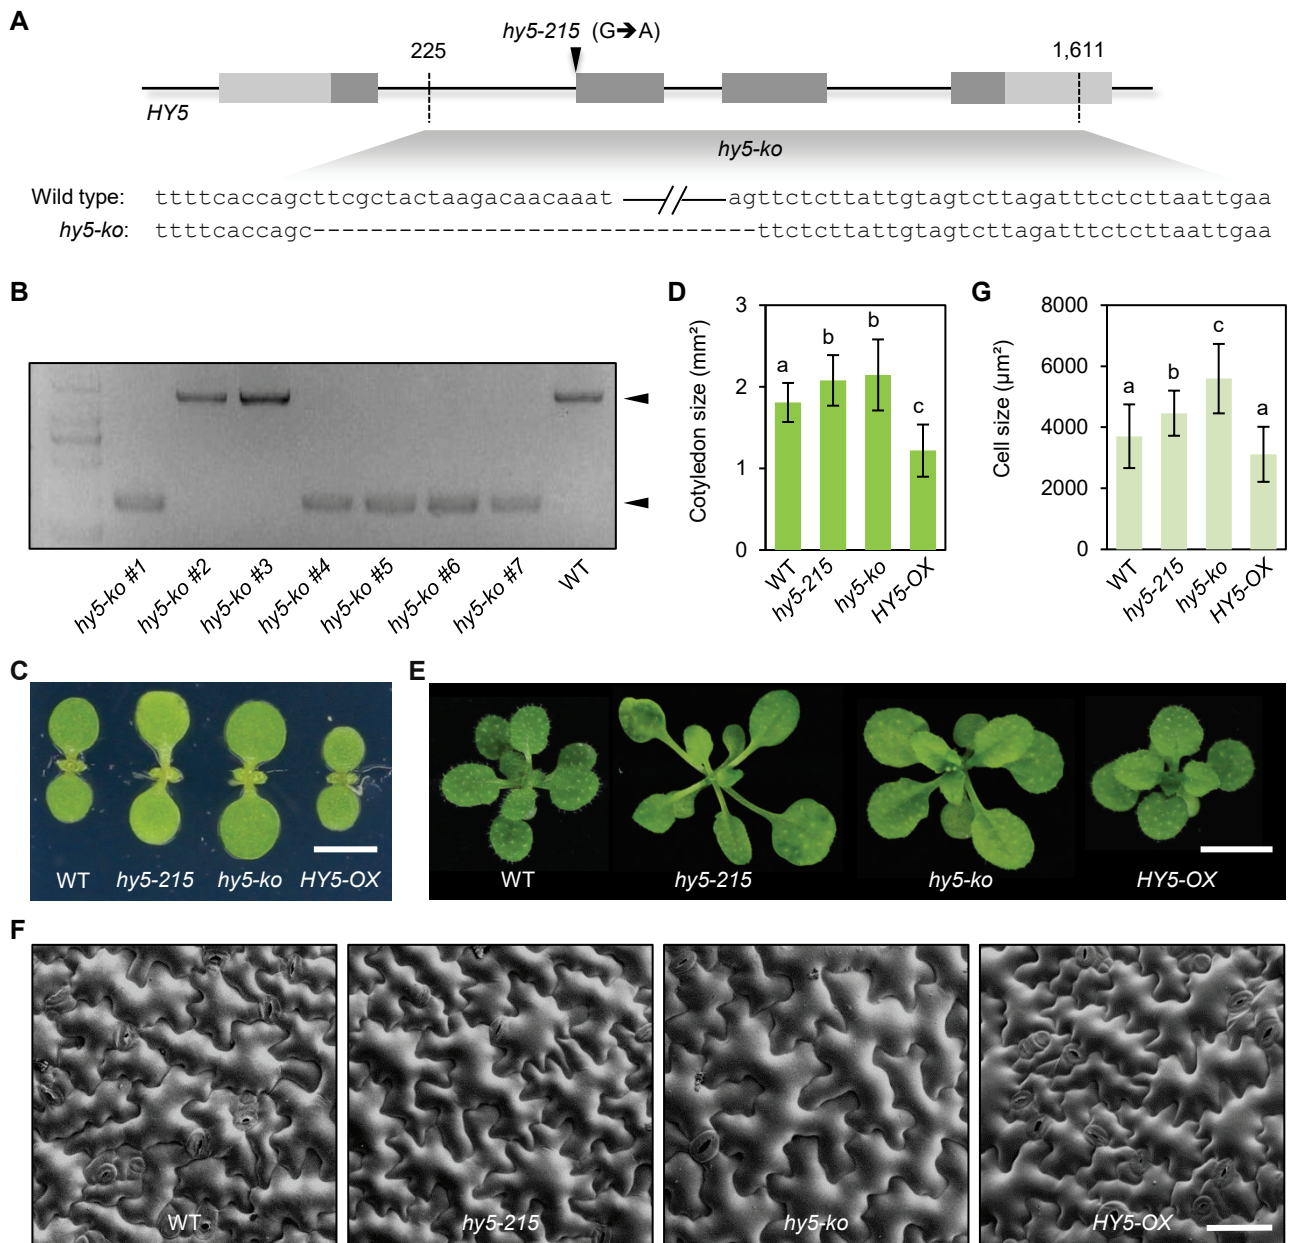

### Supplemental Figure 12. Generation and Characterization of Mutants for *HY5*.

(A) Scheme for generating the *hy5-ko* allele using CRISPR/Cas9. Two sgRNAs are designed to create paired cleavage sites resulting in a 1,386 bp deletion. The *hy5-215* allele harbors a point mutation near the end of the first intron that interferes splicing. (B) Genotyping result with PCR products according to the wild type and deletion alleles indicated. Lines #4 and #5 were selected for subsequent analyses. (C-D) Morphological comparison and quantification of cotyledon size. Data are mean  $\pm$  SD from 10 individual seedlings. Different letters denote genotypes with significant difference (Student's *t*-test,  $p < 0.05$ ). Bar, 2 mm. (E) Morphological comparison of adult plants. Bar, 5 mm. (F-G) SEM analysis of the cotyledon epidermal cells. Bar, 100  $\mu$ m. (G) Quantification of the cotyledon epidermal cell size. Data are mean  $\pm$  SD from 100 individual cells from three seedlings. Different letters denote genotypes with significant difference (Student's *t*-test,  $p < 0.05$ ). Supports Figures 11 and 12 in the main manuscript.

## Parsed Citations

- Addo-Quaye, C., Miller, W., and Axtell, M.J. (2009).** CleaveLand: a pipeline for using degradome data to find cleaved small RNA targets. *Bioinformatics* 25, 130-131.  
Google Scholar: [Author Only](#) [Title Only](#) [Author and Title](#)
- Alves, L., Jr., Niemeier, S., Hauenschield, A., Rehmsmeier, M., and Merkle, T. (2009).** Comprehensive prediction of novel microRNA targets in *Arabidopsis thaliana*. *Nucleic Acids Res* 37, 4010-4021.  
Google Scholar: [Author Only](#) [Title Only](#) [Author and Title](#)
- Andres-Robin, A., Reymond, M.C., Dupire, A., Battu, V., Dubrulle, N., Mouille, G., Lefebvre, V., Pelloux, J., Boudaoud, A., Traas, J., Scutt, C.P., and Monéger, F. (2018).** Evidence for the regulation of gynoecium morphogenesis by ETTIN via cell wall dynamics. *Plant Physiol* 178, 1222-1232.  
Google Scholar: [Author Only](#) [Title Only](#) [Author and Title](#)
- Atmodjo, M.A., Hao, Z.Y., and Mohnen, D. (2013).** Evolving views of pectin biosynthesis. *Annu Rev Plant Biol*, 64, 747-779.  
Google Scholar: [Author Only](#) [Title Only](#) [Author and Title](#)
- Bogre, L., Magyar, Z., and Lopez-Juez, E. (2008).** New clues to organ size control in plants. *Genome Biol* 9, 226.  
Google Scholar: [Author Only](#) [Title Only](#) [Author and Title](#)
- Bouton, S., Leboeuf, E., Mouille, G., Leydecker, M.T., Talbotec, J., Granier, F., Lahaye, M., Hofte, H., and Truong, H.N. (2002).** Quasimodo1 encodes a putative membrane-bound glycosyltransferase required for normal pectin synthesis and cell adhesion in *Arabidopsis*. *Plant Cell* 14, 2577-2590.  
Google Scholar: [Author Only](#) [Title Only](#) [Author and Title](#)
- Braybrook, S.A., and Kuhlemeier, C. (2010).** How a plant builds leaves. *Plant Cell* 22, 1006-1018.  
Google Scholar: [Author Only](#) [Title Only](#) [Author and Title](#)
- Brown, B.A., and Jenkins, G.I. (2008).** UV-B signaling pathways with different fluence-rate response profiles are distinguished in mature *Arabidopsis* leaf tissue by requirement for UVR8, HY5, and HYH. *Plant Physiol* 146, 576-588.  
Google Scholar: [Author Only](#) [Title Only](#) [Author and Title](#)
- Burko, Y., Seluzicki, A., Zander, M., Pedmale, U.V., Ecker, J.R., and Chory, J. (2020).** Chimeric activators and repressors define HY5 activity and reveal a light-regulated feedback mechanism. *Plant Cell* 32, 967-983.  
Google Scholar: [Author Only](#) [Title Only](#) [Author and Title](#)
- Caffall, K.H., and Mohnen, D. (2009).** The structure, function, and biosynthesis of plant cell wall pectic polysaccharides. *Carbohydr Res* 344, 1879-1900.  
Google Scholar: [Author Only](#) [Title Only](#) [Author and Title](#)
- Cosgrove, D.J. (2005).** Growth of the plant cell wall. *Nat Rev Mol Cell Biol* 6, 850-861.  
Google Scholar: [Author Only](#) [Title Only](#) [Author and Title](#)
- Czesnick, H., and Lenhard, M. (2015).** Size control in plants - lessons from leaves and flowers. *Cold Spring Harb Perspect Biol* 7, a019190.  
Google Scholar: [Author Only](#) [Title Only](#) [Author and Title](#)
- Dai, X.B., and Zhao, P.X. (2011).** psRNATarget: a plant small RNA target analysis server. *Nucleic Acids Res* 39, W155-W159.  
Google Scholar: [Author Only](#) [Title Only](#) [Author and Title](#)
- Du, L., Li, N., Chen, L.L., Xu, Y.X., Li, Y., Zhang, Y.Y., Li, C.Y., and Li, Y.H. (2014).** The ubiquitin receptor DA1 regulates seed and organ size by modulating the stability of the ubiquitin-specific protease UBP15/SOD2 in *Arabidopsis*. *Plant Cell* 26, 665-677.  
Google Scholar: [Author Only](#) [Title Only](#) [Author and Title](#)
- Efroni, I., Blum, E., Goldshmidt, A., and Eshed, Y. (2008).** A protracted and dynamic maturation schedule underlies *Arabidopsis* leaf development. *Plant Cell* 20, 2293-2306.  
Google Scholar: [Author Only](#) [Title Only](#) [Author and Title](#)
- Efroni, I., Eshed, Y., and Lifschitz, E. (2010).** Morphogenesis of simple and compound leaves: a critical review. *Plant Cell* 22, 1019-1032.  
Google Scholar: [Author Only](#) [Title Only](#) [Author and Title](#)
- Esch, J.J., Chen, M.A., Hillestad, M., and Marks, M.D. (2004).** Comparison of TRY and the closely related At1g01380 gene in controlling *Arabidopsis* trichome patterning. *Plant J* 40, 860-869.  
Google Scholar: [Author Only](#) [Title Only](#) [Author and Title](#)
- Felippes, F.F., Schneeberger, K., Dezulian, T., Huson, D.H., and Weigel, D. (2008).** Evolution of *Arabidopsis thaliana* microRNAs from random sequences. *RNA* 14, 2455-2459.  
Google Scholar: [Author Only](#) [Title Only](#) [Author and Title](#)
- Ferjani, A., Horiguchi, G., Yano, S., and Tsukaya, H. (2007).** Analysis of leaf development in fugu mutants of *Arabidopsis* reveals three compensation modes that modulate cell expansion in determinate organs. *Plant Physiol* 144, 988-999.  
Google Scholar: [Author Only](#) [Title Only](#) [Author and Title](#)

**Gao, Z., Li, J., Li, L., Yang, Y., Li, J., Fu, C., Zhu, D., He, H., Cai, H., and Li, L. (2020). Structural and functional analyses of hub microRNAs in an integrated gene regulatory network of Arabidopsis. Genomics Proteomics Bioinformatics. In press.**

Google Scholar: [Author Only Title Only Author and Title](#)

**Geitmann, A., and Ortega, J.K. (2009). Mechanics and modeling of plant cell growth. Trends Plant Sci 14, 467-478.**

Google Scholar: [Author Only Title Only Author and Title](#)

**German, M.A., Luo, S.J., Schroth, G., Meyers, B.C., and Green, P.J. (2009). Construction of Parallel Analysis of RNA Ends (PARE) libraries for the study of cleaved miRNA targets and the RNA degradome. Nat Protoc 4, 356-362.**

Google Scholar: [Author Only Title Only Author and Title](#)

**German, M.A., Pillay, M., Jeong, D.H., Hetawal, A., Luo, S.J., Janardhanan, P., Kannan, V., Rymarquis, L.A., Nobuta, K., German, R., De Paoli, E., Lu, C., Schroth, G., Meyers, B.C., and Green, P.J. (2008). Global identification of microRNA-target RNA pairs by parallel analysis of RNA ends. Nat Biotechnol 26, 941-946.**

Google Scholar: [Author Only Title Only Author and Title](#)

**Gierlinger, N., Keplinger, T., and Harrington, M. (2012). Imaging of plant cell walls by confocal Raman microscopy. Nat Protoc 7, 1694-1708.**

Google Scholar: [Author Only Title Only Author and Title](#)

**Gonzalez, N., Vanhaeren, H., and Inze, D. (2012). Leaf size control: complex coordination of cell division and expansion. Trends Plant Sci 17, 332-340.**

Google Scholar: [Author Only Title Only Author and Title](#)

**Gruber, A.R., Lorenz, R., Bernhart, S.H., Neuböck, R., and Hofacker, I.L. (2008). The Vienna RNA websuite. Nucleic Acids Res 36, W70-W74.**

Google Scholar: [Author Only Title Only Author and Title](#)

**Guo, Z., Kuang, Z., Wang, Y., Zhao, Y., Tao, Y., Cheng, C., Yang, J., Lu, X., Hao, C., Wang, T., Cao, X., Wei, J., Li, L., and Yang, X. (2020). PmiREN: a comprehensive encyclopedia of plant miRNAs. Nucleic Acids Res 48, D1114-D1121.**

Google Scholar: [Author Only Title Only Author and Title](#)

**Haas, K.T., Wightman, R., Meyerowitz, E.M., and Peaucelle, A. (2020). Pectin homogalacturonan nanofilament expansion drives morphogenesis in plant epidermal cells. Science 367, 1003-1007.**

Google Scholar: [Author Only Title Only Author and Title](#)

**Harholt, J., Suttangkakul, A., and Scheller, H.V. (2010). Biosynthesis of pectin. Plant Physiol 153, 384-395.**

Google Scholar: [Author Only Title Only Author and Title](#)

**Hepworth, J., and Lenhard, M. (2014). Regulation of plant lateral-organ growth by modulating cell number and size. Curr Opin Plant Biol 17, 36-42.**

Google Scholar: [Author Only Title Only Author and Title](#)

**Hirayama, T., Kieber, J.J., Hirayama, N., Kogan, M., Guzman, P., Nourizadeh, S., Alonso, J.M., Dailey, W.P., Dancis, A., and Ecker, J.R. (1999). RESPONSIVE-TO-ANTAGONIST1, a Menkes/Wilson disease-related copper transporter, is required for ethylene signaling in Arabidopsis. Cell 97, 383-393.**

Google Scholar: [Author Only Title Only Author and Title](#)

**Hong, L.L., Dumond, M., Zhu, M.Y., Tsugawa, S., Li, C.B., Boudaoud, A., Hamant, O., and Roeder, A.H.K. (2018). Heterogeneity and robustness in plant morphogenesis: from cells to organs. Annu Rev Plant Biol, 69, 469-495.**

Google Scholar: [Author Only Title Only Author and Title](#)

**Huang, L., Li, X.H., Zhang, W.W., Ung, N., Liu, N.N., Yin, X.L., Li, Y., Mcewan, R.E., Dilkes, B., Dai, M.J., Hicks, G.R., Raikhel, N.V., Staiger, C.J., and Zhang, C.H. (2020). Endosidin20 targets the cellulose synthase catalytic domain to inhibit cellulose biosynthesis. Plant Cell 32, 2141-2157.**

Google Scholar: [Author Only Title Only Author and Title](#)

**Johnson, K., and Lenhard, M. (2011). Genetic control of plant organ growth. New Phytol 191, 319-333.**

Google Scholar: [Author Only Title Only Author and Title](#)

**Kant, S., Peng, M.S., and Rothstein, S.J. (2011). Genetic regulation by NLA and microRNA827 for maintaining nitrate-dependent phosphate homeostasis in Arabidopsis. PLoS Genet 7, e1002021.**

Google Scholar: [Author Only Title Only Author and Title](#)

**Kawade, K., Horiguchi, G., and Tsukaya, H. (2010). Non-cell-autonomously coordinated organ size regulation in leaf development. Development 137, 4221-4227.**

Google Scholar: [Author Only Title Only Author and Title](#)

**Kozomara, A., Birgaoanu, M., and Griffiths-Jones, S. (2018). miRBase: from microRNA sequences to function. Nucleic Acids Res 47, D155-D162.**

Google Scholar: [Author Only Title Only Author and Title](#)

**Langmead, B., and Salzberg, S.L. (2012). Fast gapped-read alignment with Bowtie 2. Nat Methods 9, 357-359.**

Google Scholar: [Author Only](#) [Title Only](#) [Author and Title](#)

Li, J., Yu, M.A., Geng, L.L., and Zhao, J. (2010). The fasciclin-like arabinogalactan protein gene, FLA3, is involved in microspore development of *Arabidopsis*. *Plant J.* 64, 482-497.

Google Scholar: [Author Only](#) [Title Only](#) [Author and Title](#)

Liu, Q.K., Wang, F., and Axtell, M.J. (2014). Analysis of complementarity requirements for plant microRNA targeting using a *Nicotiana benthamiana* quantitative transient assay. *Plant Cell* 26, 741-753.

Google Scholar: [Author Only](#) [Title Only](#) [Author and Title](#)

Liu, S., Li, J.H., Wu, J., Zhou, K.R., Zhou, H., Yang, J.H., and Qu, L.H. (2015). StarScan: a web server for scanning small RNA targets from degradome sequencing data. *Nucleic Acids Res* 43, W480-W486.

Google Scholar: [Author Only](#) [Title Only](#) [Author and Title](#)

Llave, C., Xie, Z.X., Kasschau, K.D., and Carrington, J.C. (2002). Cleavage of Scarecrow-like mRNA targets directed by a class of *Arabidopsis* miRNA. *Science* 297, 2053-2056.

Google Scholar: [Author Only](#) [Title Only](#) [Author and Title](#)

Ma, Z.R., Coruh, C., and Axtell, M.J. (2010). *Arabidopsis lyrata* small RNAs: transient MIRNA and small interfering RNA loci within the *Arabidopsis* genus. *Plant Cell* 22, 1090-1103.

Google Scholar: [Author Only](#) [Title Only](#) [Author and Title](#)

Mallory, A.C., and Vaucheret, H. (2006). Functions of microRNAs and related small RNAs in plants. *Nat Genet* 38, S31-36.

Google Scholar: [Author Only](#) [Title Only](#) [Author and Title](#)

Mao, Y., Zhang, H., Xu, N., Zhang, B., Gou, F., and Zhu, J.K. (2013). Application of the CRISPR-Cas system for efficient genome engineering in plants. *Mol Plant* 6, 2008-2011.

Google Scholar: [Author Only](#) [Title Only](#) [Author and Title](#)

Mizukami, Y., and Fischer, R.L. (2000). Plant organ size control: ANTEGUMENTA regulates growth and cell numbers during organogenesis. *Proc Natl Acad Sci USA* 97, 942-947.

Google Scholar: [Author Only](#) [Title Only](#) [Author and Title](#)

Obayashi, T., Aoki, Y., Tadaka, S., Kagaya, Y., and Kinoshita, K. (2018). ATTED-II in 2018: a plant coexpression database based on investigation of the statistical property of the mutual rank index. *Plant Cell Physiol* 59, e3.

Google Scholar: [Author Only](#) [Title Only](#) [Author and Title](#)

Ori, N., Cohen, A.R., Etzioni, A., Brand, A., Yanai, O., Shleizer, S., Menda, N., Ansellem, Z., Efroni, I., Pekker, I., Alvarez, J.P., Blum, E., Zamir, D., and Eshed, Y. (2007). Regulation of LANCEOLATE by miR319 is required for compound-leaf development in tomato. *Nat Genet* 39, 787-791.

Google Scholar: [Author Only](#) [Title Only](#) [Author and Title](#)

Oyama, T., Shimura, Y., and Okada, K. (1997). The *Arabidopsis* HY5 gene encodes a bZIP protein that regulates stimulus-induced development of root and hypocotyl. *Gene Dev* 11, 2983-2995.

Google Scholar: [Author Only](#) [Title Only](#) [Author and Title](#)

Palatnik, J.F., Allen, E., Wu, X.L., Schommer, C., Schwab, R., Carrington, J.C., and Weigel, D. (2003). Control of leaf morphogenesis by microRNAs. *Nature* 425, 257-263.

Google Scholar: [Author Only](#) [Title Only](#) [Author and Title](#)

Palin, R., and Geitmann, A. (2012). The role of pectin in plant morphogenesis. *Biosystems* 109, 397-402.

Google Scholar: [Author Only](#) [Title Only](#) [Author and Title](#)

Pan, J.W., Huang, D.H., Guo, Z.L., Kuang, Z., Zhang, H., Xie, X.Y., Ma, Z.F., Gao, S.P., Lerda, M.T., Chu, C.C., and Li, L. (2018). Overexpression of microRNA408 enhances photosynthesis, growth, and seed yield in diverse plants. *J Integr Plant Biol* 60, 323-340.

Google Scholar: [Author Only](#) [Title Only](#) [Author and Title](#)

Parsons, H.T., Christiansen, K., Knierim, B., Carroll, A., Ito, J., Batth, T.S., Smith-Moritz, A.M., Morrison, S., McInerney, P., Hadi, M.Z., Auer, M., Mukhopadhyay, A., Petzold, C.J., Scheller, H.V., Loque, D., and Heazlewood, J.L. (2012). Isolation and proteomic characterization of the *Arabidopsis* Golgi defines functional and novel components involved in plant cell wall biosynthesis. *Plant Physiol* 159, 12-26.

Google Scholar: [Author Only](#) [Title Only](#) [Author and Title](#)

Peaucelle, A., Wightman, R., and Hofte, H. (2015). The control of growth symmetry breaking in the *Arabidopsis* hypocotyl. *Cur Biol* 25, 1746-1752.

Google Scholar: [Author Only](#) [Title Only](#) [Author and Title](#)

Powell, A.E., and Lenhard, M. (2012). Control of organ size in plants. *Curr Biol* 22, R360-367.

Google Scholar: [Author Only](#) [Title Only](#) [Author and Title](#)

Qi, J.Y., Wu, B.B., Feng, S.L., Lu, S.Q., Guan, C.M., Zhang, X., Qiu, D.L., Hu, Y.C., Zhou, Y.H., Li, C.Y., Long, M., and Jiao, Y.L. (2017). Mechanical regulation of organ asymmetry in leaves. *Nat Plants* 3, 724-733.

Google Scholar: [Author Only](#) [Title Only](#) [Author and Title](#)

- Qin, L.X., Chen, Y., Zeng, W., Li, Y., Gao, L., Li, D.D., Bacic, A., Xu, W.L., and Li, X.B. (2017). The cotton beta-galactosyltransferase 1 (GalT1) that galactosylates arabinogalactan proteins participates in controlling fiber development. *Plant J* 89, 957-971.  
Google Scholar: [Author Only Title Only Author and Title](#)
- Qu, Y., Egelund, J., Gilson, P.R., Houghton, F., Gleeson, P.A., Schultz, C.J., and Bacic, A. (2008). Identification of a novel group of putative *Arabidopsis thaliana* beta-(1,3)-galactosyltransferases. *Plant Mol Biol* 68, 43-59.  
Google Scholar: [Author Only Title Only Author and Title](#)
- Rajagopalan, R., Vaucheret, H., Trejo, J., and Bartel, D.P. (2006). A diverse and evolutionarily fluid set of microRNAs in *Arabidopsis thaliana*. *Gene Dev* 20, 3407-3425.  
Google Scholar: [Author Only Title Only Author and Title](#)
- Rhee, S.Y., and Somerville, C.R. (1998). Tetrad pollen formation in quartet mutants of *Arabidopsis thaliana* is associated with persistence of pectic polysaccharides of the pollen mother cell wall. *Plant J* 15, 79-88.  
Google Scholar: [Author Only Title Only Author and Title](#)
- Rodriguez, R.E., Mecchia, M.A., Debernardi, J.M., Schommer, C., Weigel, D., and Palatnik, J.F. (2010). Control of cell proliferation in *Arabidopsis thaliana* by microRNA miR396. *Development* 137, 103-112.  
Google Scholar: [Author Only Title Only Author and Title](#)
- Rodriguez, R.E., Schommer, C., and Palatnik, J.F. (2016). Control of cell proliferation by microRNAs in plants. *Curr Opin Plant Biol* 34, 68-76.  
Google Scholar: [Author Only Title Only Author and Title](#)
- Rogers, K., and Chen, X.M. (2013). Biogenesis, turnover, and mode of action of plant micrnas. *Plant Cell* 25, 2383-2399.  
Google Scholar: [Author Only Title Only Author and Title](#)
- Salvador-Guirao, R., Baldrich, P., Weigel, D., Rubio-Somoza, I., and San Segundo, B. (2018). The microRNA miR773 is involved in the *Arabidopsis* immune response to fungal pathogens. *Mol Plant Microbe Interact* 31, 249-259.  
Google Scholar: [Author Only Title Only Author and Title](#)
- Schommer, C., Debernardi, J.M., Bresso, E.G., Rodriguez, R.E., and Palatnik, J.F. (2014). Repression of cell proliferation by miR319-regulated TCP4. *Mol Plant* 7, 1533-1544.  
Google Scholar: [Author Only Title Only Author and Title](#)
- Sibout, R., Sukumar, P., Hettiarachchi, C., Holm, M., Muday, G.K., and Hardtke, C.S. (2006). Opposite root growth phenotypes of hy5 versus hy5 hyh mutants correlate with increased constitutive auxin signaling. *PLoS Genet* 2, e202.  
Google Scholar: [Author Only Title Only Author and Title](#)
- Somerville, C. (2006). Cellulose synthesis in higher plants. *Annu Rev Cell Dev Biol* 22, 53-78.  
Google Scholar: [Author Only Title Only Author and Title](#)
- Somerville, C., Bauer, S., Brininstool, G., Facette, M., Hamann, T., Milne, J., Osborne, E., Paredez, A., Persson, S., Raab, T., Vorwerk, S., and Youngs, H. (2004). Toward a systems approach to understanding plant cell walls. *Science* 306, 2206-2211.  
Google Scholar: [Author Only Title Only Author and Title](#)
- Song, Y.H., Yoo, C.M., Hong, A.P., Kim, S.H., Jeong, H., Shin, S.Y., Kim, H.J., Yun, D.J., Lim, C.O., Bahk, J.D., Lee, S.Y., Nagao, R.T., Key, J.L., and Hong, J.C. (2008). DNA-binding study identifies C-box and hybrid C/G-box or C/A-box motifs as high-affinity binding sites for STF1 and LONG HYPOCOTYL5 proteins. *Plant Physiol* 146, 1862-1877.  
Google Scholar: [Author Only Title Only Author and Title](#)
- Stief, A., Altmann, S., Hoffmann, K., Pant, B.D., Scheible, W.R., and Baurle, I. (2014). *Arabidopsis* miR156 regulates tolerance to recurring environmental stress through SPL transcription factors. *Plant Cell* 26, 1792-1807.  
Google Scholar: [Author Only Title Only Author and Title](#)
- Tan, L., Eberhard, S., Pattathil, S., Warder, C., Glushka, J., Yuan, C.H., Hao, Z.Y., Zhu, X., Avci, U., Miller, J.S., Baldwin, D., Pham, C., Orlando, R., Darvill, A., Hahn, M.G., Kieliszewski, M.J., and Mohnen, D. (2013). An *Arabidopsis* cell wall proteoglycan consists of pectin and arabinoxylan covalently linked to an arabinogalactan protein. *Plant Cell* 25, 270-287.  
Google Scholar: [Author Only Title Only Author and Title](#)
- Tang, J., and Chu, C. (2017). MicroRNAs in crop improvement: fine-tuners for complex traits. *Nat Plants* 3, 17077.  
Google Scholar: [Author Only Title Only Author and Title](#)
- Taylor, K.A.C.C. (1993). Protocols in biotechnology - a colorimetric method for the quantitation of galacturonic acid. *Appl Biochem Biotech* 43, 51-54.  
Google Scholar: [Author Only Title Only Author and Title](#)
- Tumaneng, K., Russell, R.C., and Guan, K.L. (2012). Organ size control by Hippo and TOR pathways. *Curr Biol* 22, R368-R379.  
Google Scholar: [Author Only Title Only Author and Title](#)
- Velasquez, S.M., Ricardi, M.M., Dorosz, J.G., Fernandez, P.V., Nadra, A.D., Pol-Fachin, L., Egelund, J., Gille, S., Harholt, J., Ciancia, M., Verli, H., Pauly, M., Bacic, A., Olsen, C.E., Ulvskov, P., Petersen, B.L., Somerville, C., Iusem, N.D., and Estevez, J.M. (2011). O-glycosylated cell wall proteins are essential in root hair growth. *Science* 332, 1401-1403.  
Google Scholar: [Author Only Title Only Author and Title](#)



- Verherbruggen, Y., Marcus, S.E., Haeger, A., Ordaz-Ortiz, J.J., and Knox, J.P. (2009). An extended set of monoclonal antibodies to pectic homogalacturonan. *Carbohydr Res* 344, 1858-1862.**  
Google Scholar: [Author Only](#) [Title Only](#) [Author and Title](#)
- Vogel, J.P., Raab, T.K., Schiff, C., and Somerville, S.C. (2002). PMR6, a pectate lyase-like gene required for powdery mildew susceptibility in *Arabidopsis*. *Plant Cell* 14, 2095-2106.**  
Google Scholar: [Author Only](#) [Title Only](#) [Author and Title](#)
- Voinnet, O. (2009). Origin, Biogenesis, and Activity of Plant MicroRNAs. *Cell* 136, 669-687.**  
Google Scholar: [Author Only](#) [Title Only](#) [Author and Title](#)
- Wang, T., Park, Y.B., Cosgrove, D.J., and Hong, M. (2015). Cellulose-pectin spatial contacts are inherent to Never-Dried *Arabidopsis* primary cell walls: evidence from solid-state nuclear magnetic resonance. *Plant Physiol* 168, 871-884.**  
Google Scholar: [Author Only](#) [Title Only](#) [Author and Title](#)
- Wolf, S., Mravec, J., Greiner, S., Mouille, G., and Hofte, H. (2012). Plant cell wall homeostasis is mediated by Brassinosteroid feedback signaling. *Curr Biol* 22, 1732-1737.**  
Google Scholar: [Author Only](#) [Title Only](#) [Author and Title](#)
- Wu, H.J., Ma, Y.K., Chen, T., Wang, M., and Wang, X.J. (2012). PsRobot: a web-based plant small RNA meta-analysis toolbox. *Nucleic Acids Res* 40, W22-W28.**  
Google Scholar: [Author Only](#) [Title Only](#) [Author and Title](#)
- Xi, X.N., Kim, S.H., and Tittmann, B. (2015). Atomic force microscopy based nanoindentation study of onion abaxial epidermis walls in aqueous environment. *J Appl Phys* 117, 024703.**  
Google Scholar: [Author Only](#) [Title Only](#) [Author and Title](#)
- Xiao, C., Somerville, C., and Anderson, C.T. (2014). POLYGALACTURONASE INVOLVED IN EXPANSION1 functions in cell elongation and flower development in *Arabidopsis*. *Plant Cell* 26, 1018-1035.**  
Google Scholar: [Author Only](#) [Title Only](#) [Author and Title](#)
- Yadav, V., Kundu, S., Chattopadhyay, D., Negi, P., Wei, N., Deng, X.W., and Chattopadhyay, S. (2002). Light regulated modulation of Z-box containing promoters by photoreceptors and downstream regulatory components, COP1 and HY5, in *Arabidopsis*. *Plant J* 31, 741-753.**  
Google Scholar: [Author Only](#) [Title Only](#) [Author and Title](#)
- Yakubov, G.E., Bonilla, M.R., Chen, H., Doblin, M.S., Bacic, A., Gidley, M.J., and Stokes, J.R. (2016). Mapping nano-scale mechanical heterogeneity of primary plant cell walls. *J Exp Bot* 67, 2799-2816.**  
Google Scholar: [Author Only](#) [Title Only](#) [Author and Title](#)
- Yang, T., Wang, Y., Teotia, S., Zhang, Z., and Tang, G. (2018). The making of leaves: how small rna networks modulate leaf development. *Front Plant Sci* 9, 824.**  
Google Scholar: [Author Only](#) [Title Only](#) [Author and Title](#)
- Yang, X., Zhang, H., and Li, L. (2012). Alternative mRNA processing increases the complexity of microRNA-based gene regulation in *Arabidopsis*. *Plant J* 70, 421-431.**  
Google Scholar: [Author Only](#) [Title Only](#) [Author and Title](#)
- Yuan, N., Balasubramanian, V.K., Chopra, R., and Mendu, V. (2019). The photoperiodic flowering time regulator FKF1 negatively regulates cellulose biosynthesis. *Plant Physiol* 180, 2240-2253.**  
Google Scholar: [Author Only](#) [Title Only](#) [Author and Title](#)
- Zeng, Y.N., Yarbrough, J.M., Mittal, A., Tucker, M.P., Vinzant, T.B., Decker, S.R., and Himmel, M.E. (2016). In situ label-free imaging of hemicellulose in plant cell walls using stimulated Raman scattering microscopy. *Biotechnol Biofuels* 9, 256.**  
Google Scholar: [Author Only](#) [Title Only](#) [Author and Title](#)
- Zhang, H., He, H., Wang, X., Wang, X., Yang, X., Li, L., and Deng, X.W. (2011). Genome-wide mapping of the HY5-mediated gene networks in *Arabidopsis* that involve both transcriptional and post-transcriptional regulation. *Plant J* 65, 346-358.**  
Google Scholar: [Author Only](#) [Title Only](#) [Author and Title](#)
- Zhang, H., Zhao, X., Li, J., Cai, H., Deng, X.W., and Li, L. (2014). MicroRNA408 is critical for the HY5-SPL7 gene network that mediates the coordinated response to light and copper. *Plant Cell* 26, 4933-4953.**  
Google Scholar: [Author Only](#) [Title Only](#) [Author and Title](#)
